# Supplementary material for: Mild and selective transformations of amines and alcohols through bioinspired oxidation with nitrous oxide or oxygen
Source: Royal Society of Chemistry journal article supplement (doi:10.1039/d3cy01635h), 2024-01-01
Supplement: d3cy01635h1.pdf [file d3cy01635h1.pdf]

## SUPPORTING INFORMATION

Mild and Selective Transformations of Amines and Alcohols Through Bioinspired Oxidation with Nitrous Oxide or Oxygen

Bruce A. Lobo Sacchelli,<sup>a,b</sup> Ruben S. M. Almeida,<sup>a</sup> Abdallah G. Mahmoud,<sup>a</sup> Dmytro S. Nesterov,<sup>a</sup> Leandro H. Andrade,<sup>b</sup> Ana M. M. Faisca Phillips,<sup>a,\*</sup> Elisabete C. B. A. Alegria,<sup>a,c\*</sup> Martin H. G. Prechtl,<sup>a,\*</sup>

<sup>a</sup>*Centro de Química Estrutural, Instituto Superior Técnico, Universidade de Lisboa, Av. Rovisco Pais 1, 1049-001, Lisboa, Portugal. <http://www.h2.bio> <https://cqe.tecnico.ulisboa.pt>*

<sup>b</sup>*Departamento de Química Fundamental, Instituto de Química, Universidade de São Paulo, Av. Prof. Lineu Prestes, 748 – Butantã, São Paulo – SP, 05508-900, Brasil.*

<sup>c</sup>*Departamento de Engenharia Química, Instituto Superior de Engenharia de Lisboa, Instituto Politécnico de Lisboa, 1959-007 Lisbon, Portugal.*

\*Correspondence: [martin.prechtl@tecnico.ulisboa.pt](mailto:martin.prechtl@tecnico.ulisboa.pt), [elisabete.alegria@isel.pt](mailto:elisabete.alegria@isel.pt),  
[ana.faiscaphillips@tecnico.ulisboa.pt](mailto:ana.faiscaphillips@tecnico.ulisboa.pt)

### Table of contents

|                                                                                                                                                                                                                                                                                      |    |
|--------------------------------------------------------------------------------------------------------------------------------------------------------------------------------------------------------------------------------------------------------------------------------------|----|
| <b>1. General experimental proceedings</b> .....                                                                                                                                                                                                                                     | 2  |
| 1.1. General procedure for the synthesis of the ruthenium complex [RuCl <sub>2</sub> ( <i>p</i> -cymene)] <sub>2</sub> ( <b>Ru-I</b> ; <b>Ru<sub>2</sub></b> ) .....                                                                                                                 | 3  |
| 1.2. General procedure for the synthesis of the ruthenium complex {[( <i>p</i> -cymene)Ru]( $\mu$ -H)( $\mu$ -Cl)( $\mu$ -HCO <sub>2</sub> )[Ru( <i>p</i> -cymene)]}BF <sub>4</sub> ( <b>Ru-II</b> ) .....                                                                           | 3  |
| <b>2. Oxidation of Benzylamines</b> .....                                                                                                                                                                                                                                            | 3  |
| 2.1. Optimisation of the benzylamine oxidation with ruthenium complexes <b>Ru-I</b> ([RuCl <sub>2</sub> ( <i>p</i> -cymene)] <sub>2</sub> and <b>Ru-II</b> {[( <i>p</i> -cymene)Ru]( $\mu$ -H)( $\mu$ -Cl)( $\mu$ -HCO <sub>2</sub> )[Ru( <i>p</i> -cymene)]}BF <sub>4</sub> ) ..... | 3  |
| 2.2. Procedure for the oxidation of benzylamines with <b>Ru-II</b> {[( <i>p</i> -cymene)Ru]( $\mu$ -H)( $\mu$ -Cl)( $\mu$ -HCO <sub>2</sub> )[Ru( <i>p</i> -cymene)]}BF <sub>4</sub> ) .....                                                                                         | 5  |
| 2.3. Selected GC chromatograms for benzylamine oxidation .....                                                                                                                                                                                                                       | 6  |
| <b>3. Benzylamine oxidation in a sealed vessel with nitrous oxide</b> .....                                                                                                                                                                                                          | 36 |

|           |                                                                                                                                                                                                                                                                                                                           |           |
|-----------|---------------------------------------------------------------------------------------------------------------------------------------------------------------------------------------------------------------------------------------------------------------------------------------------------------------------------|-----------|
| 3.1.      | Optimisation of the benzylamine oxidation with the ruthenium complex $\{[(p\text{-cymene})\text{Ru}](\mu\text{-H})(\mu\text{-Cl})(\mu\text{-HCO}_2)[\text{Ru}(p\text{-cymene})]\}\text{BF}_4$ ( <b>Ru-II</b> ; <b>RuBF<sub>4</sub></b> ) in sealed vessel with N <sub>2</sub> O(flask with high-vacuum teflon valve)..... | 36        |
| 3.2.      | <b>Selected <sup>1</sup>H NMR analysis of benzylamine oxidation in sealed vessel (Table 4)</b> .....                                                                                                                                                                                                                      | 37        |
| 3.3.      | <b>Selected GC-FID analysis of benzylamine oxidation (Table 4)</b> .....                                                                                                                                                                                                                                                  | 41        |
| 3.4.      | Procedure for the oxidation of benzylamines with <b>Ru-II</b> $\{[(p\text{-cymene})\text{Ru}](\mu\text{-H})(\mu\text{-Cl})(\mu\text{-HCO}_2)[\text{Ru}(p\text{-cymene})]\}\text{BF}_4$ in sealed vessel with N <sub>2</sub> O.....                                                                                        | 44        |
| 3.5.      | Selected <sup>1</sup> H-NMR and GC-FID analysis of benzylamine oxidation (Table 6) .....                                                                                                                                                                                                                                  | 45        |
| <b>4.</b> | <b>Oxidation of benzyl alcohols</b> .....                                                                                                                                                                                                                                                                                 | <b>50</b> |
| 4.1.      | Optimisation of benzyl alcohol oxidation with ruthenium complex <b>Ru-II</b> $\{[(p\text{-cymene})\text{Ru}](\mu\text{-H})(\mu\text{-Cl})(\mu\text{-HCO}_2)[\text{Ru}(p\text{-cymene})]\}\text{BF}_4$ .....                                                                                                               | 50        |
| 4.2.      | Procedure for the oxidation of benzyl alcohols with <b>Ru-II</b> $\{[(p\text{-cymene})\text{Ru}](\mu\text{-H})(\mu\text{-Cl})(\mu\text{-HCO}_2)[\text{Ru}(p\text{-cymene})]\}\text{BF}_4$ .....                                                                                                                           | 50        |
| 4.3.      | GC-MS for qualitative analysis of benzyl alcohols oxidation.....                                                                                                                                                                                                                                                          | 52        |
| 4.4.      | <b>NMR spectrum of control experiments</b> .....                                                                                                                                                                                                                                                                          | 67        |
| <b>5.</b> | <b>References</b> .....                                                                                                                                                                                                                                                                                                   | <b>68</b> |

## 1. General experimental proceedings

The oxidation of benzylamines was monitored using gas chromatography with flame-ionization detection (GC-FID) on a Clarus 500 gas chromatograph/mass spectrometer. The GC was equipped with a BP-20 (SGE) column measuring 30 m × 0.22 mm × 0.25 μm. An internal standard, hexadecane (11.7 μL, 40 μmol), was added to each analysis for quantification. The calibration curves for benzylamine and benzonitrile were established using GC-FID method **1**, involving a temperature program of 10 minutes: 1 minute at 100 °C, followed by a ramp of 20°C/min to 260 °C, and then holding at 260 °C for 1 minute. These calibration curves enabled the determination of benzylamine and benzonitrile quantities in the reactions. Distinct benzylamines with varying retention times were also analysed using different GC-FID methods: GC-FID method **2** (27 min.): 1 min. at 100 °C, 20°C/min. to 200 °C, hold at 200 °C for 0 min, followed by a ramp of 10°C/min. to 260 °C, and then holding at 260 °C for 15 min. GC-FID method **3** (35 min.): 1 min. at 100 °C, 20°C/min. to 200 °C, hold at 200 °C for 0 min, followed by a ramp of 10°C/min. to 260 °C, and then holding at 260 °C for 23 min. GC-FID method **4** (60 min.): 1 min. at 100 °C, followed by a ramp of 20°C/min. to 260 °C, and then holding at 260 °C for 51 min. The oxidation of benzyl alcohols was tracked through <sup>1</sup>H nuclear magnetic resonance (NMR) analysis on a Bruker 400 MHz Avance II NMR spectrometer with a 5 mm BBO probe (d1 time = 1s). Deuterated CDCl<sub>3</sub> was used as the solvent, and cyclohexane (20 μL, 0.184 mmol) served as an internal standard. For comprehensive analysis, all reactions underwent GC-MS analysis on a Clarus 600 (GC-MS) equipped with a Zebron ZB-5 (Phenomenex) column measuring 30 m × 0.25 mm × 0.25 μm. The applied method involved a 14-minute temperature

program: 2 minutes at 80 °C, followed by a ramp of 10°C/min. to 120 °C, holding for 0 minutes, further ramping at 30°C/min. to 300 °C, and then maintaining at 300 °C for 2 minutes. The complex  $[\text{RuCl}_2(p\text{-cymene})]_2$  was purchased from Sigma-Aldrich, while deuterated  $\text{CDCl}_3$  and tert-butanol, as well as benzylamines and benzyl alcohols, were purchased from Tokyo Chemical Industry (TCI, Japan) and used without additional purification. The oxygen and nitrous oxide cylinders were obtained from Air Liquide. Silica (200 mesh) were used for column chromatography and monitored with TLC.

### 1.1. General procedure for the synthesis of the ruthenium complex $[\text{RuCl}_2(p\text{-cymene})]_2$ (**Ru-I**; **Ru<sub>2</sub>**)

Adapted from Ref. 1, a 10 mL microwave vessel equipped with a stirring bar and a pressure cap with teflon-coated septa was charged with 0.0835 g (0.32 mmol) of ruthenium(III) trichloride hydrate, along with 10 equiv. of  $\alpha$ -phellandrene (3.2 mmol; 0.436 g) and 5.5 mL of ethanol. The reaction mixture was heated to 130 °C for 4 minutes. Afterwards the reaction mixture was cooled to -32°C. The resultant precipitated complex was separated by filtration and washed with n-pentane (10 mL), and air-dried. The complex yield is approx. 83%. The obtained analytical data are in agreement with the literature.

### 1.2. General procedure for the synthesis of the ruthenium complex $\{[(p\text{-cymene})\text{Ru}](\mu\text{-H})(\mu\text{-Cl})(\mu\text{-HCO}_2)[\text{Ru}(p\text{-cymene})]\}\text{BF}_4$ (**Ru-II**)

Adapted from Ref. 2, a 20 mL vial equipped with a stirring bar and screwcap was charged with 171 mg (279  $\mu\text{mol}$ ) of  $[\text{RuCl}_2(p\text{-cymene})]_2$ . Additionally, 40 mg (475  $\mu\text{mol}$ ) of  $\text{NaHCO}_3$  and 192 mg (4.2 mmol) of  $\text{HCO}_2\text{H}$  were introduced into the vial. Subsequently, 2,5 mL of distilled water was added to the solution. The resulting mixture was stirred for 20 minutes at 95°C (or alternatively, 60 minutes at 80°C). After cooling to room temperature, a solution containing 56 mg (510  $\mu\text{mol}$ ) of  $\text{NaBF}_4$  dissolved in 1 mL distilled water was added. The ensuing precipitate was separated through filtration and subsequently washed for 3 times with distilled water. The final product, a red-orange powder-like solid was dried on air. The typical yield of this process falls within the range of 80 to 85%. The NMR data are consistent with the findings reported in Ref. 2.

## 2. Oxidation of Benzylamines

### 2.1. Optimisation of the benzylamine oxidation with ruthenium complexes **Ru-I** ( $[\text{RuCl}_2(p\text{-cymene})]_2$ ) and **Ru-II** ( $\{[(p\text{-cymene})\text{Ru}](\mu\text{-H})(\mu\text{-Cl})(\mu\text{-HCO}_2)[\text{Ru}(p\text{-cymene})]\}\text{BF}_4$ )

General procedure: A 20 mL screw-cap vial with teflon-coated septa was loaded with 120  $\mu\text{L}$  (1 mmol) of benzylamine, 1 mL of the chosen solvent (if any) and 6.1 mg (0.01 mmol) of Ru complex **I** or 6.4 mg (0.01 mmol) of complex **II**. The mixture was stirred under  $\text{O}_2$  or  $\text{N}_2\text{O}$  atmosphere (balloons). The specific conditions of catalyst, solvent, oxidant, temperature and time are given on Table 1. Following the completion of the reaction, the reaction products were analysed by NMR spectroscopy, GC and GC-MS. Reactions with water as solvent were extracted (3x1.5mL) with DCM followed by microfiltration through a Pasteur pipette with glass wool and  $\text{MgSO}_4$ . To 0.9mL of this solution hexadecane as internal was added for GC and GC-MS analysis. For NMR analysis DCM was carefully evaporated, internal standard and  $\text{CDCl}_3$  added. The acquired product data were then cross-referenced with authentic samples or established literature data to ensure accuracy and reliability. The conversion was determined by GC (internal standard hexadecane) or NMR (internal standard cyclohexane) for quantification.

**Table 1.** Benzylamine oxidation optimisation parameters.

| Entry                 | Catalyst     | Solvent          | Oxidant          | T [°C] | t [h] | Con. [%] | <b>2 (3)*</b> [%] |
|-----------------------|--------------|------------------|------------------|--------|-------|----------|-------------------|
| <b>1</b>              | <b>Ru-I</b>  | <i>t</i> -BuOH   | O <sub>2</sub>   | 35     | 20    | 10       | 61 (39)           |
| <b>2</b>              |              | <i>t</i> -BuOH   | N <sub>2</sub> O | 35     | 20    | 6        | n.d               |
| <b>3</b>              |              | <i>t</i> -BuOH   | O <sub>2</sub>   | 65     | 20    | 20       | 55 (45)           |
| <b>4</b>              |              | <i>t</i> -BuOH   | N <sub>2</sub> O | 65     | 20    | 10       | 30 (70)           |
| <b>5</b>              | <b>Ru-II</b> | <i>t</i> -BuOH   | O <sub>2</sub>   | 35     | 20    | 17       | 55 (45)           |
| <b>6</b>              |              | <i>t</i> -BuOH   | N <sub>2</sub> O | 35     | 20    | 10       | 42 (58)           |
| <b>7</b>              |              | <i>t</i> -BuOH   | O <sub>2</sub>   | 65     | 20    | >99      | 71 (29)           |
| <b>8</b>              |              | <i>t</i> -BuOH   | N <sub>2</sub> O | 65     | 20    | >99      | 67 (33)           |
| <b>9</b>              |              | neat             | O <sub>2</sub>   | 65     | 70    | >99      | 40 (60)           |
| <b>10</b>             |              | neat             | N <sub>2</sub> O | 65     | 70    | >99      | 43 (57)           |
| <b>11</b>             |              | H <sub>2</sub> O | O <sub>2</sub>   | 65     | 70    | >99      | 41 (59)           |
| <b>12</b>             |              | H <sub>2</sub> O | N <sub>2</sub> O | 65     | 70    | >99      | 50 (50)           |
| <b>13</b>             |              | <i>t</i> -BuOH   | O <sub>2</sub>   | 65     | 70    | >99      | 91 (9)            |
| <b>14</b>             |              | <i>t</i> -BuOH   | N <sub>2</sub> O | 65     | 70    | >99      | 89 (11)           |
| <b>15</b>             | <b>Ru-II</b> | <i>t</i> -BuOH   | O <sub>2</sub>   | 65     | 4     | 26       | 67 (33)           |
| <b>16</b>             |              | <i>t</i> -BuOH   | N <sub>2</sub> O | 65     | 4     | 19       | 67 (33)           |
| <b>17<sup>1</sup></b> |              | <i>t</i> -BuOH   | O <sub>2</sub>   | 65     | 8     | 57       | 74 (26)           |
| <b>18</b>             |              | <i>t</i> -BuOH   | N <sub>2</sub> O | 65     | 8     | 21       | 67 (33)           |
| <b>19</b>             |              | <i>t</i> -BuOH   | O <sub>2</sub>   | 65     | 16    | >99      | 70 (30)           |
| <b>20</b>             |              | <i>t</i> -BuOH   | N <sub>2</sub> O | 65     | 16    | >99      | 69 (31)           |
| <b>21</b>             |              | <i>t</i> -BuOH   | O <sub>2</sub>   | 65     | 24    | >99      | 85 (15)           |
| <b>22</b>             |              | <i>t</i> -BuOH   | N <sub>2</sub> O | 65     | 24    | >99      | 77 (23)           |
| <b>23</b>             |              | <i>t</i> -BuOH   | O <sub>2</sub>   | 65     | 48    | >99      | 74 (26)           |
| <b>24</b>             |              | <i>t</i> -BuOH   | N <sub>2</sub> O | 65     | 48    | >99      | 67 (33)           |

Reaction conditions: Benzylamine (1 mmol, except neat conditions; 4.5 mmol), solvent (1mL, except neat conditions, no solvent added), 65°C, time varying, [Ru] = [(*p*-cymene)Ru]( $\mu$ -H)( $\mu$ -Cl)( $\mu$ -HCO<sub>2</sub>)[Ru(*p*-cymene)]BF<sub>4</sub> (RuBF<sub>4</sub>, 0.01 mmol), oxidant gas varying (balloon). Conversions and yields were determined by GC and GC-MS analysis with

hexadecane as internal standard. Imine quantities and benzylamine conversions were also checked by <sup>1</sup>H NMR analysis with cyclohexane as internal standard. \*Nitrile **2** yield, the side-product is the secondary imine **3** (in brackets).

## 2.2. Procedure for the oxidation of benzylamines with **Ru-II** $\{[(p\text{-cymene})\text{Ru}](\mu\text{-H})(\mu\text{-Cl})(\mu\text{-HCO}_2)[\text{Ru}(p\text{-cymene})])\}\text{BF}_4$

A 20 mL screw-cap vial was loaded with 1 mmol of benzylamine, 1 mL of *tert*-butanol (*t*-BuOH), and 6.4 mg (0.01 mmol) of the complex  $\{[(p\text{-cymene})\text{Ru}](\mu\text{-H})(\mu\text{-Cl})(\mu\text{-HCO}_2)[\text{Ru}(p\text{-cymene})])\}\text{BF}_4$ . The mixture was stirred for 24 hours at 65 °C under O<sub>2</sub> atmosphere (balloon). The resulting products were identified through NMR and GC-MS analyses and compared to authentic samples or literature data. Conversions were quantified using either GC or NMR with internal standard (*vide supra*). Results are summarized in Table 5 of the manuscript.

The following products were exemplary isolated by column chromatography with silica.

- Benzonitrile: 73 mg (0.71 mmol), yellowish liquid, 71% yield, R<sub>f</sub>=0.6 (1:4, EtOAc:hexane).
- 3-Bromobenzonitrile: 131 mg (0.72 mmol), yellowish liquid, 72% yield, R<sub>f</sub>=0.71 (1:4, EtOAc:hexane).
- 2,4-dimethoxybenzonitrile: 119 mg (0.89 mmol), light yellowish liquid, 89% yield, R<sub>f</sub>=0.66 (1:1, EtOAc:hexane).

### 2.3. Selected GC chromatograms for benzylamine oxidation

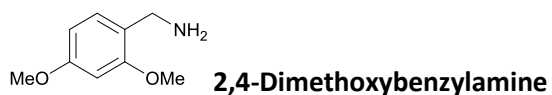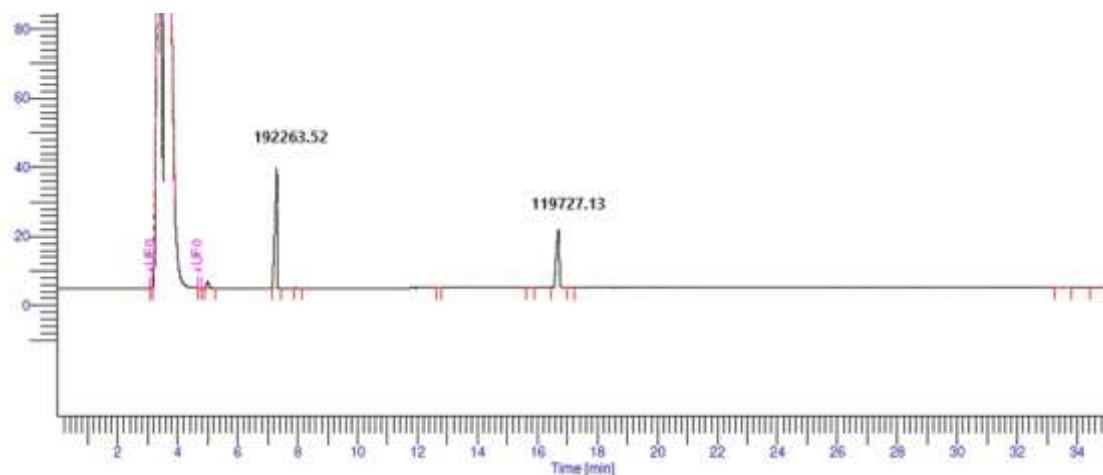

Figure 1: **GC-FID**, 3 – 4.7 min.: solvents (chloroform and <sup>t</sup>BuOH), 4.99 min.: *p*-cymene (from catalyst), 7.3 min.: hexadecane (internal standard), 16.7 min.: 2,4-dimethoxybenzonitrile

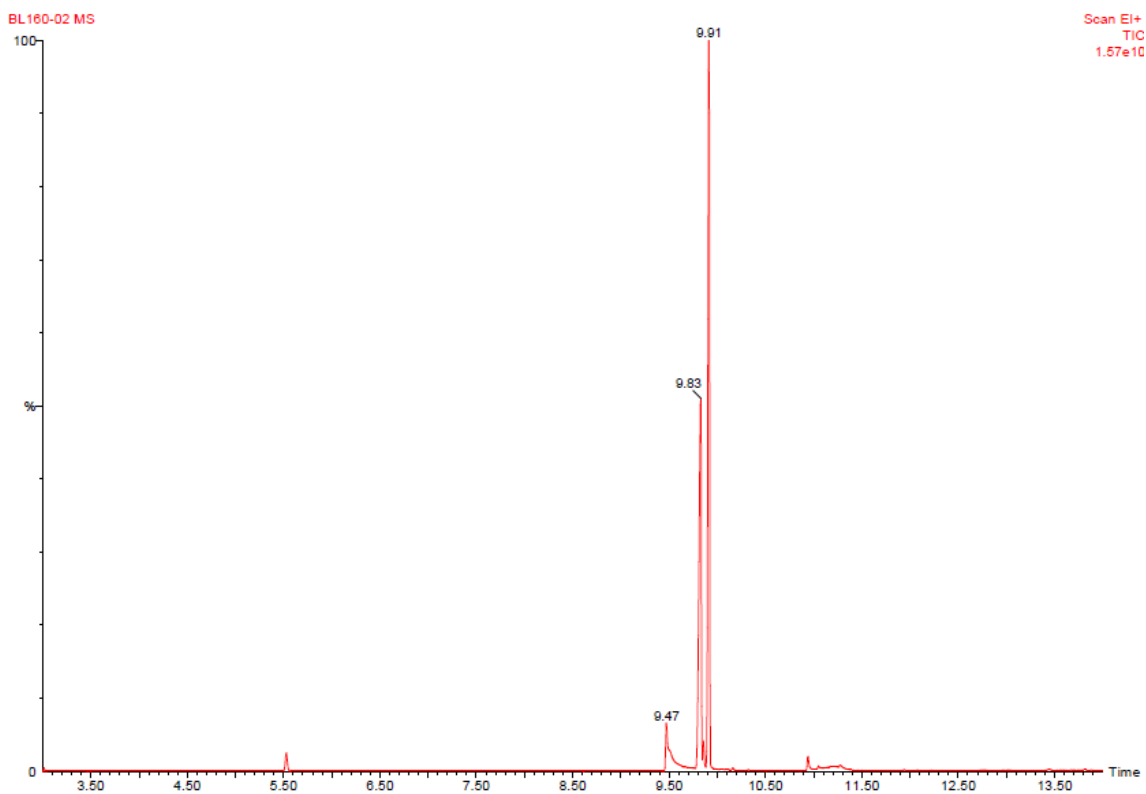

Figure 2 **GC-MS**, Ca. 5.5 min.: *p*-cymene (from catalyst), 9.47 min.: 2,4-dimethoxybenzylamine, 9.83 min.: 2,4-dimethoxybenzonitrile, 9.91 min.: hexadecane (internal standard), 10.5-11 min.: 2,4 dimethoxybenzamide.

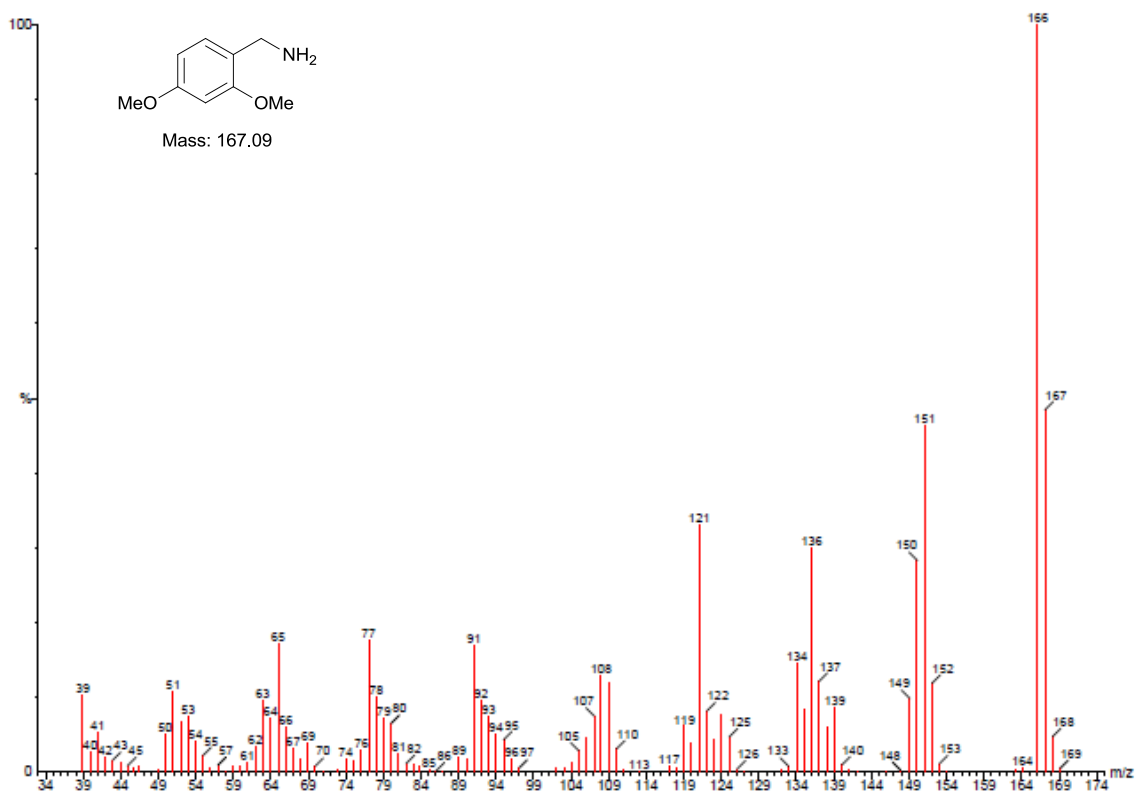

Figure 3: MS of 2,4-dimethoxybenzylamine

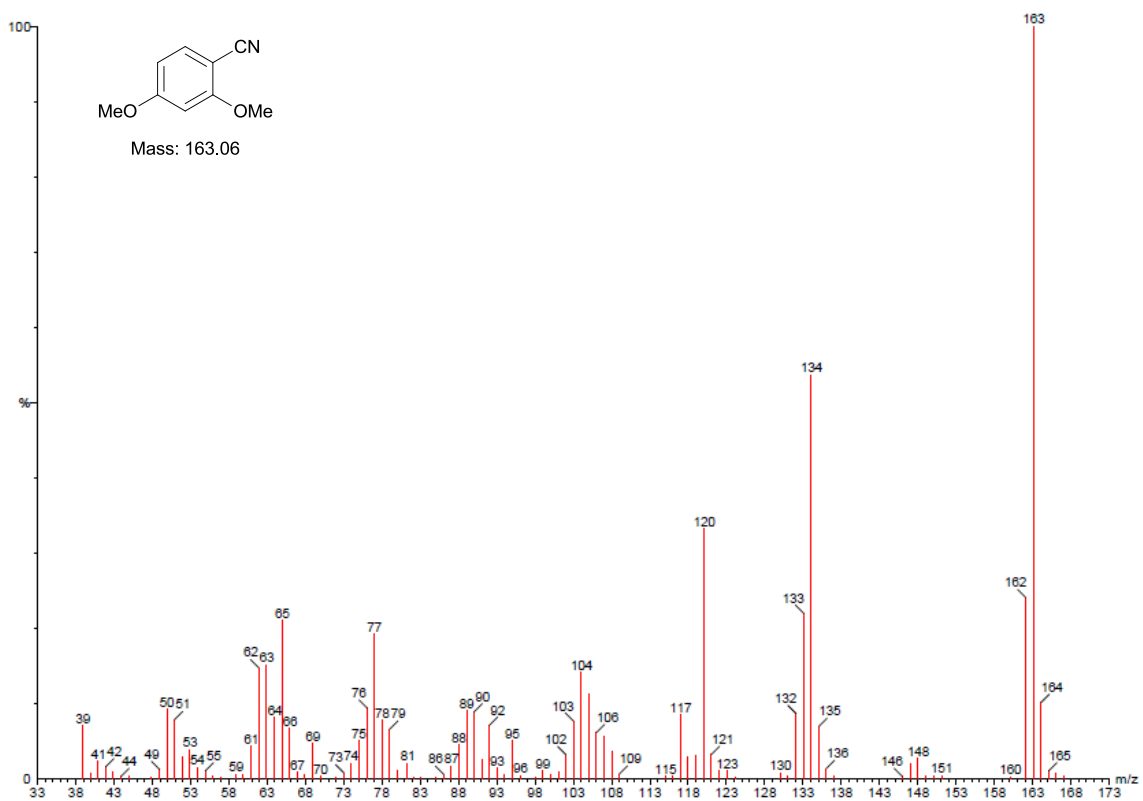

Figure 4 MS of 2,4-dimethoxybenzotrile

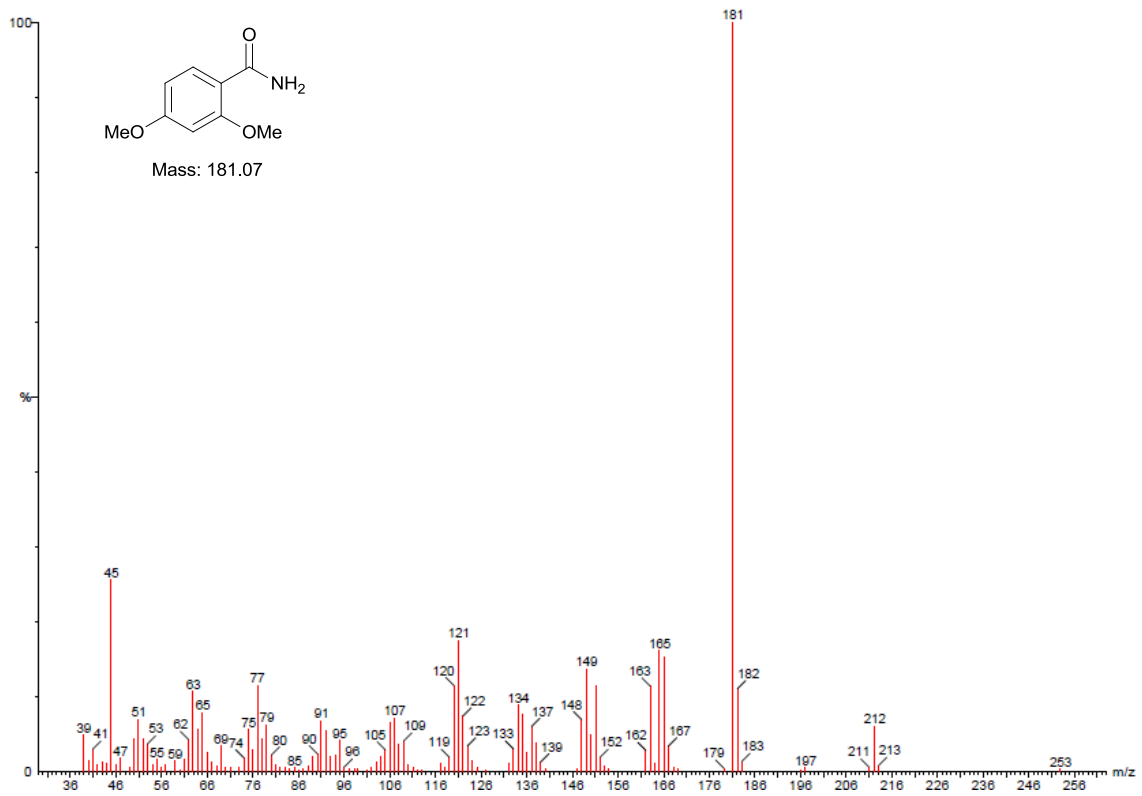

Figure 5 MS of 2,4-dimethoxybenzamide



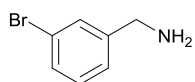

**3-Bromobenzylamine**

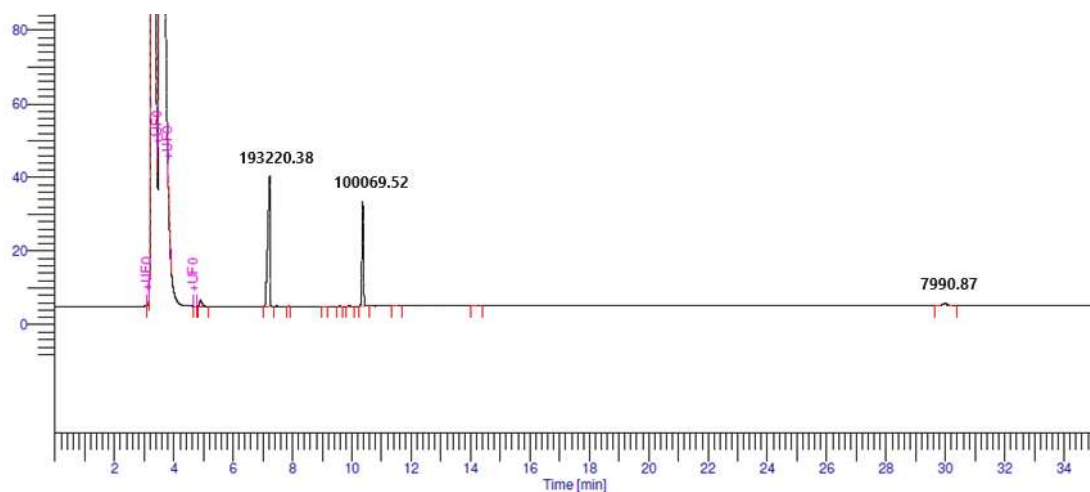

Figure 6 **GC-FID**, 3 – 4.7 min.: solvents (chloroform and <sup>t</sup>BuOH), 4.99 min.: *p*-cymene (from catalyst), 7.2 min.: hexadecane (internal standard), 10.4 min.: 3-bromobenzonitrile, 30 min.: imine

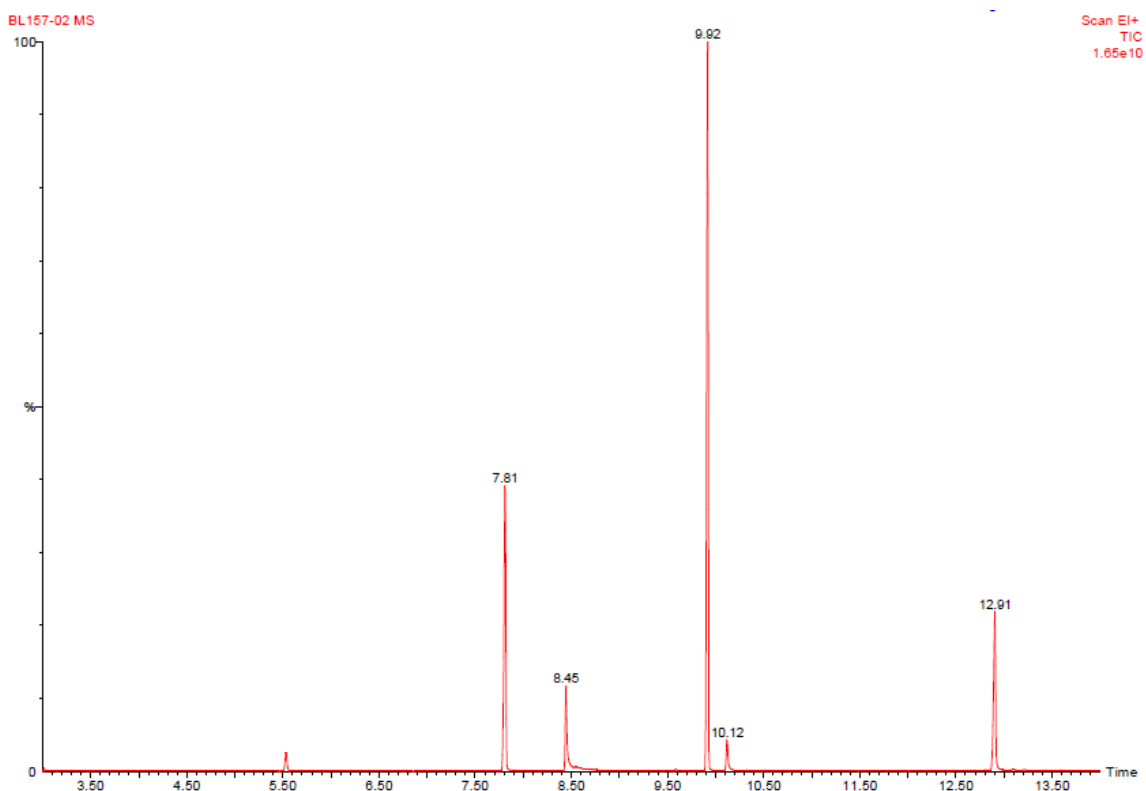

Figure 7 **GC-MS**, Ca. 5.5 min.: *p*-cymene (from catalyst), 7.81 min.: 3-bromobenzonitrile, 8.45 min.: 3-bromobenzylamine, 9.92 min.: hexadecane (internal standard), 10.12 min.: 3-bromobenzamide, 12.91 min.: *N*-(3-bromobenzyl)-1-(3-bromophenyl)methanimine

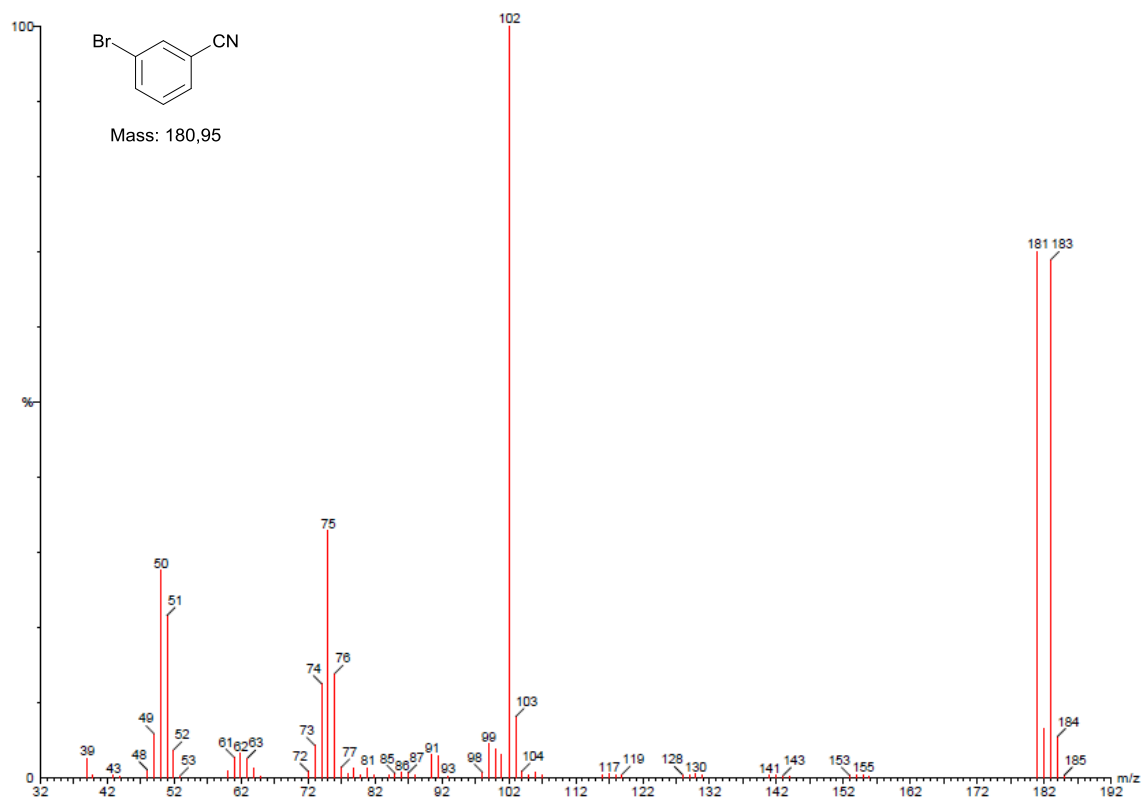

Figure 8 MS of 3-bromobenzonitrile

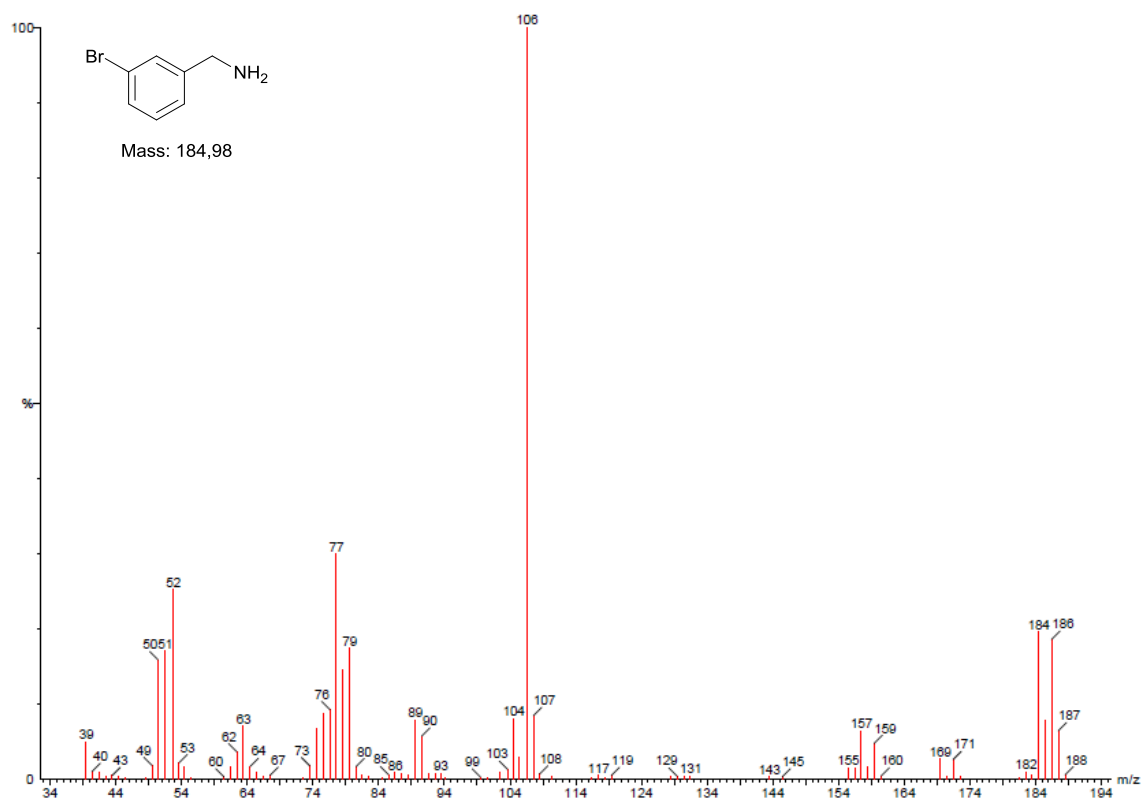

Figure 9 MS of 8.45 min.: 3-Bromobenzylamine

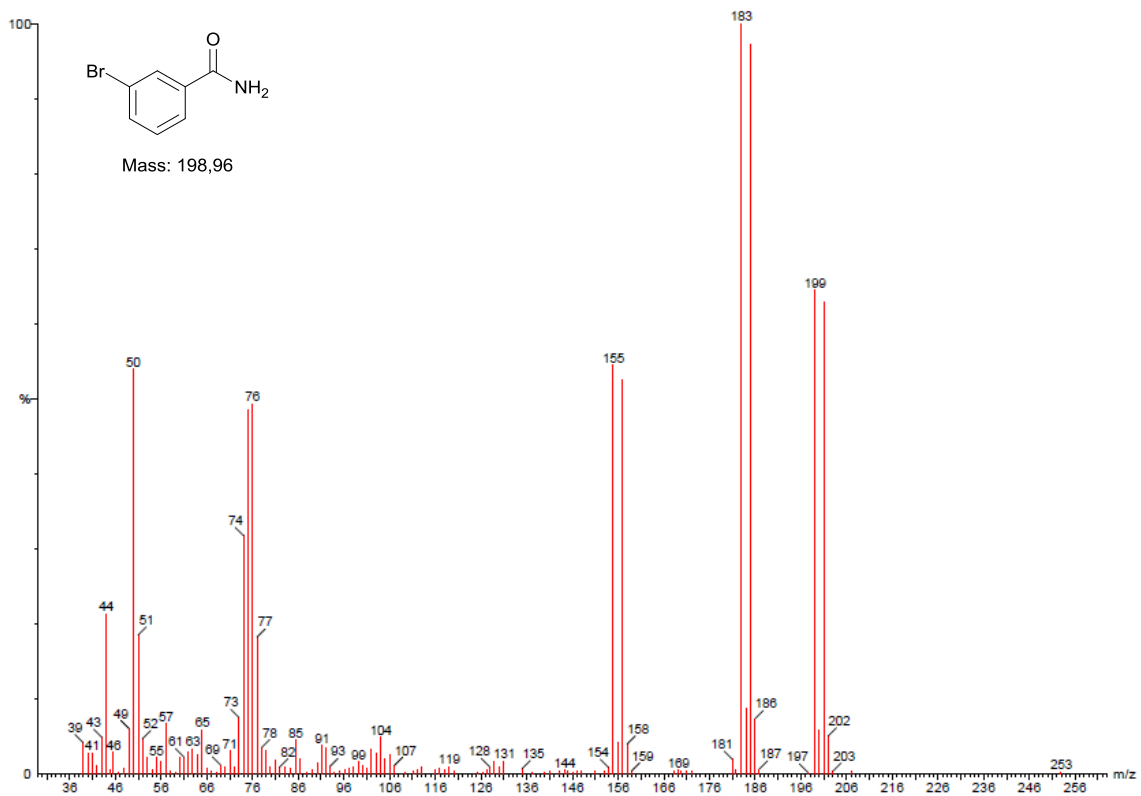

Figure 10 MS of 3-bromobenzamide

12.91 min.: *N*-(3-bromobenzyl)-1-(3-bromophenyl)methanimine

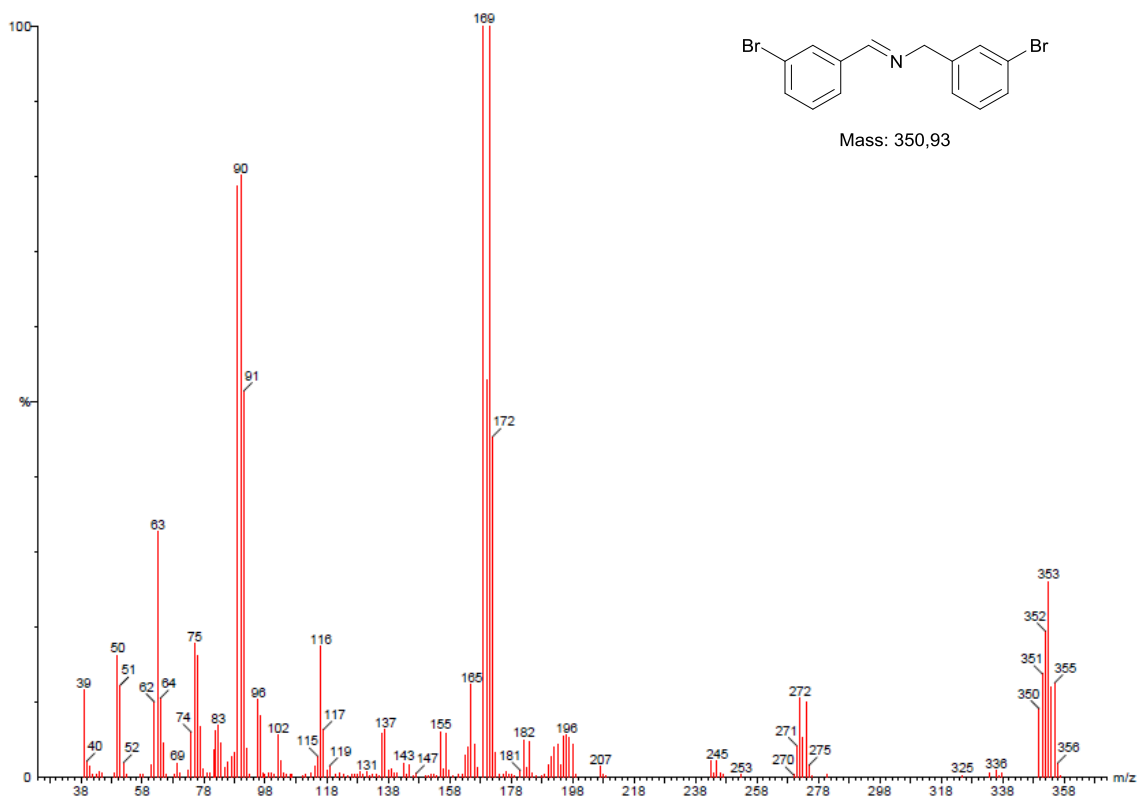

Figure 11 MS of *N*-(3-bromobenzyl)-1-(3-bromophenyl)methanimine

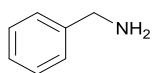

**Benzylamine**

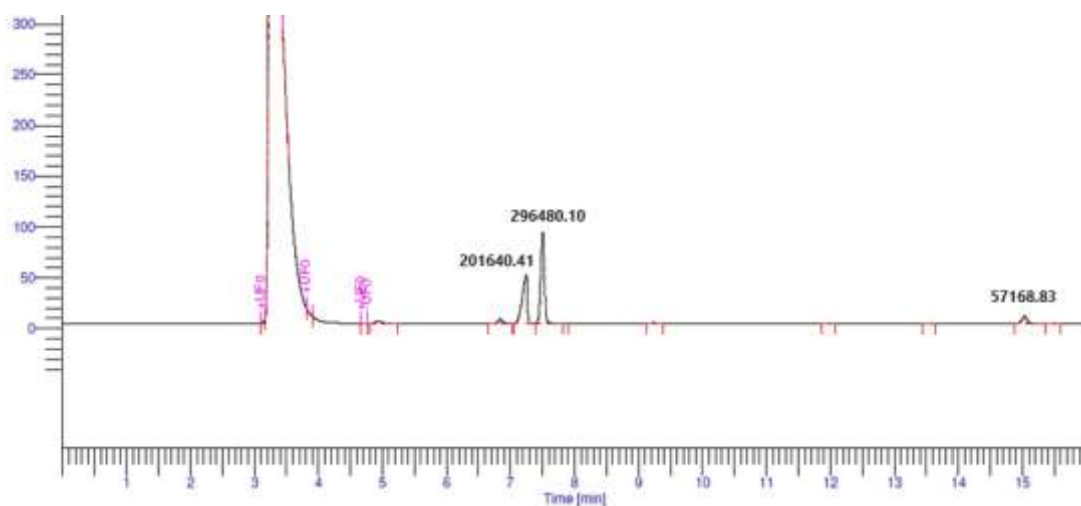

Figure 12 **GC-FID**, 3 – 4.7 min.: Solvents (Chloroform and <sup>t</sup>BuOH), 4.99 min.: *p*-cymene (from catalyst), 7.3 min.: hexadecane (internal standard), 7.5 min.: benzonitrile, 15 min.: imine

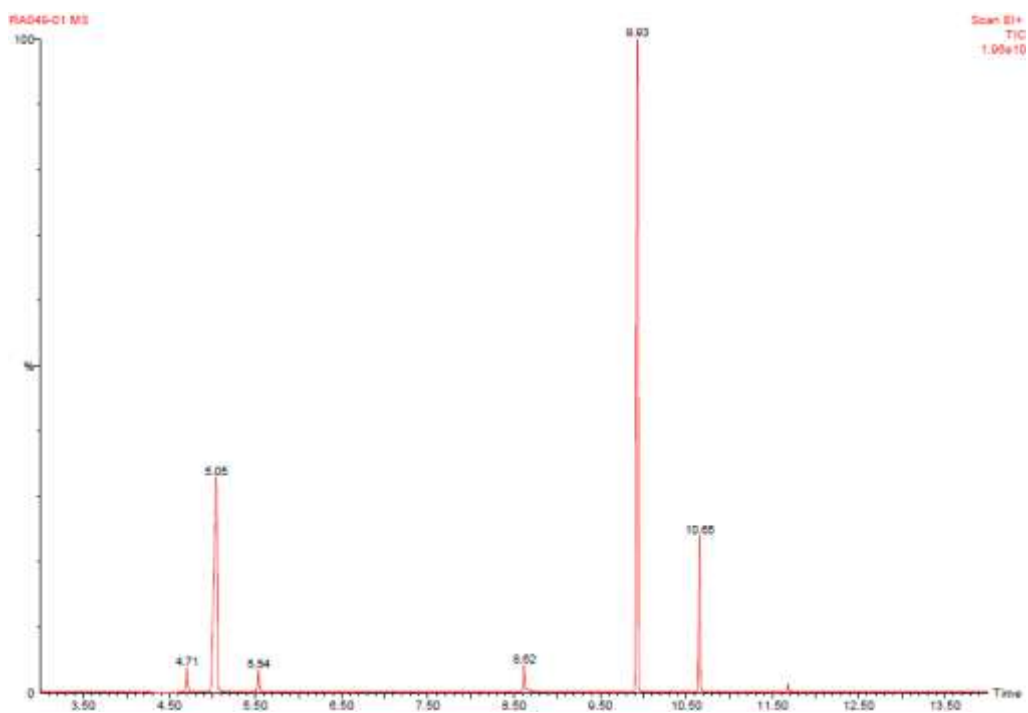

Figure 13 **GC-MS**, ), 4.71 min.: benzylamine, 5.05 min.: benzonitrile, 5.54 min.: *p*-cymene (from catalyst), 8.62 min. benzylamide, 9.92 min.: hexadecane (internal standard), 10.65 min.: *N*-benzyl-1-phenylmethanimine,

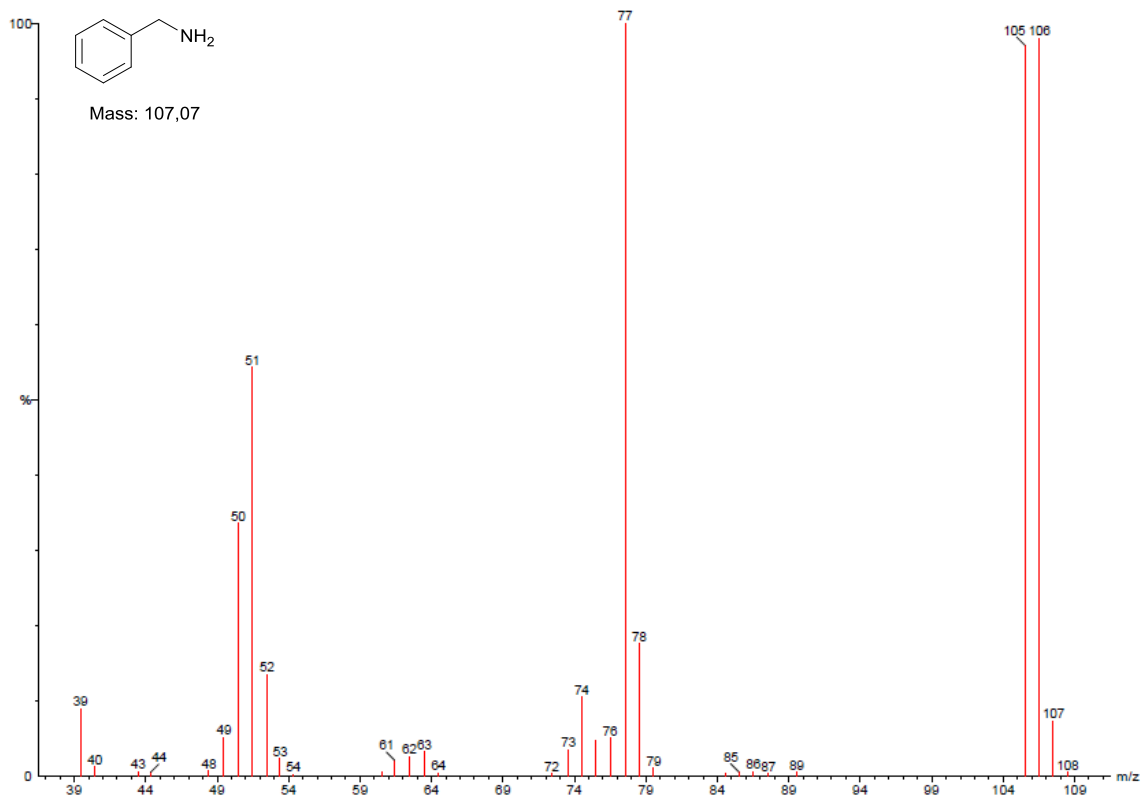

Figure 14 MS of benzylamine

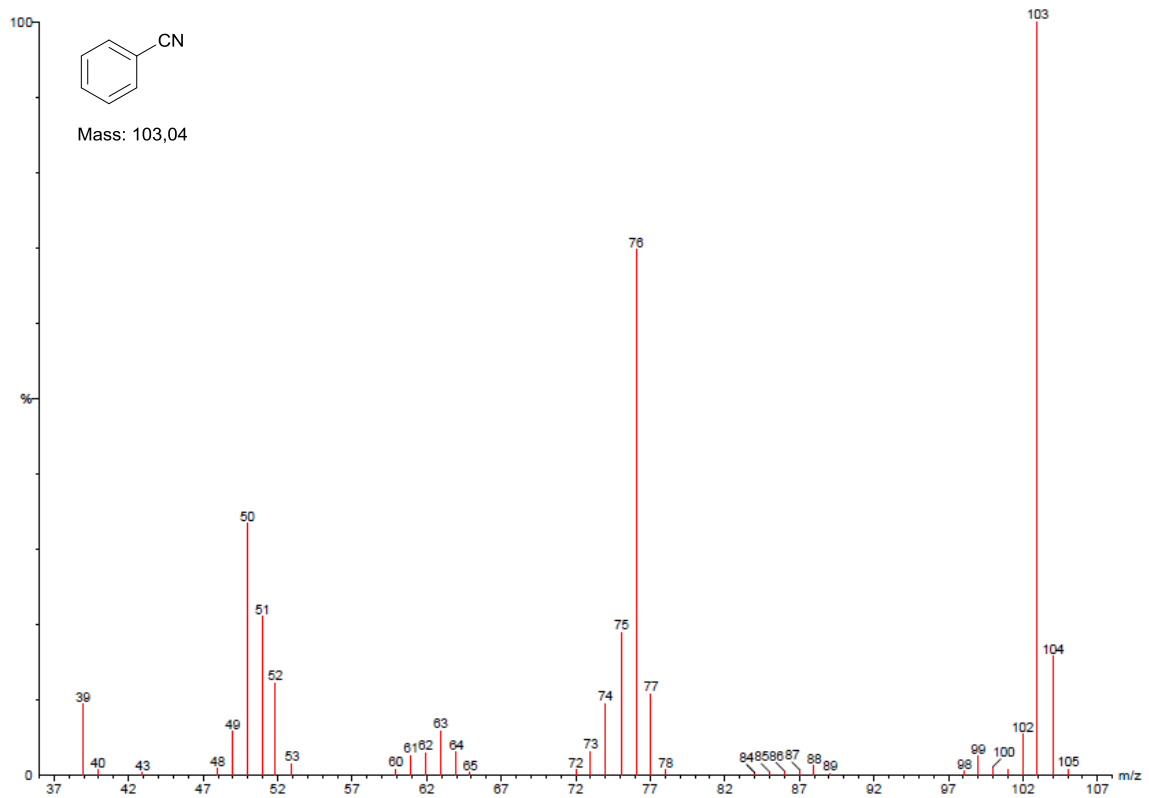

Figure 15 MS of benzonitrile

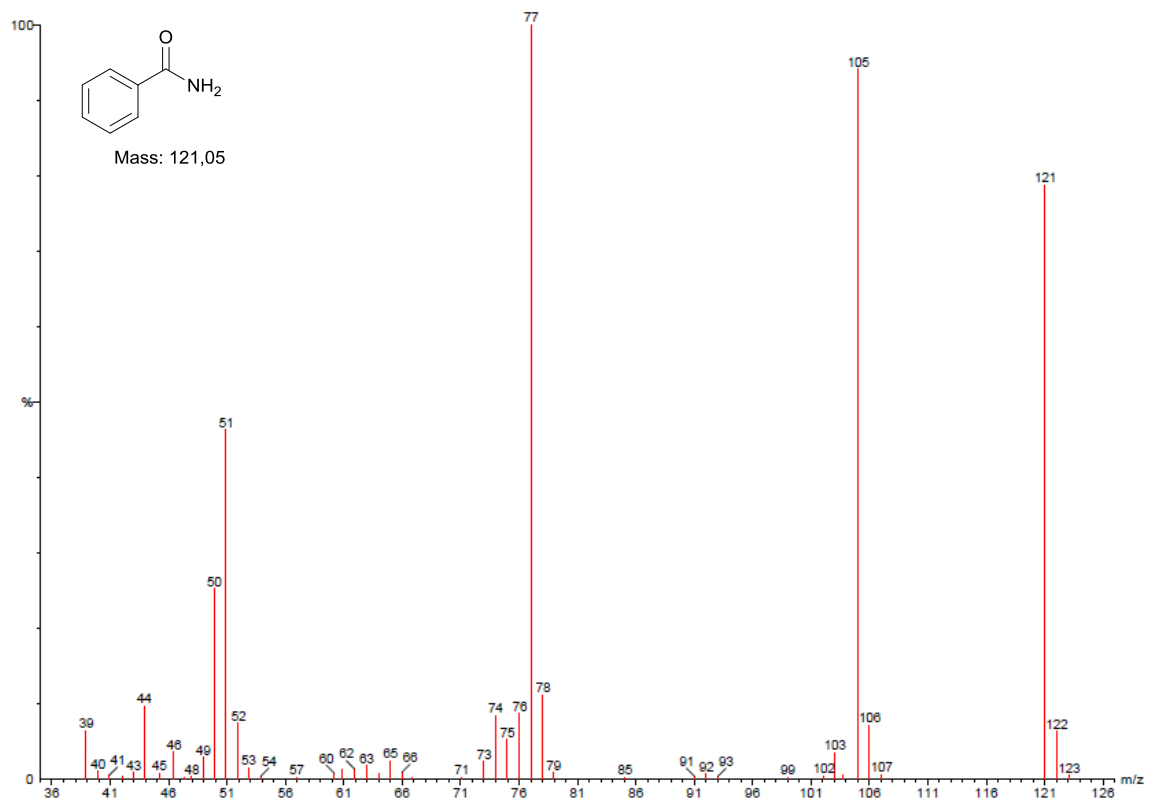

Figure 16 MS of benzamide

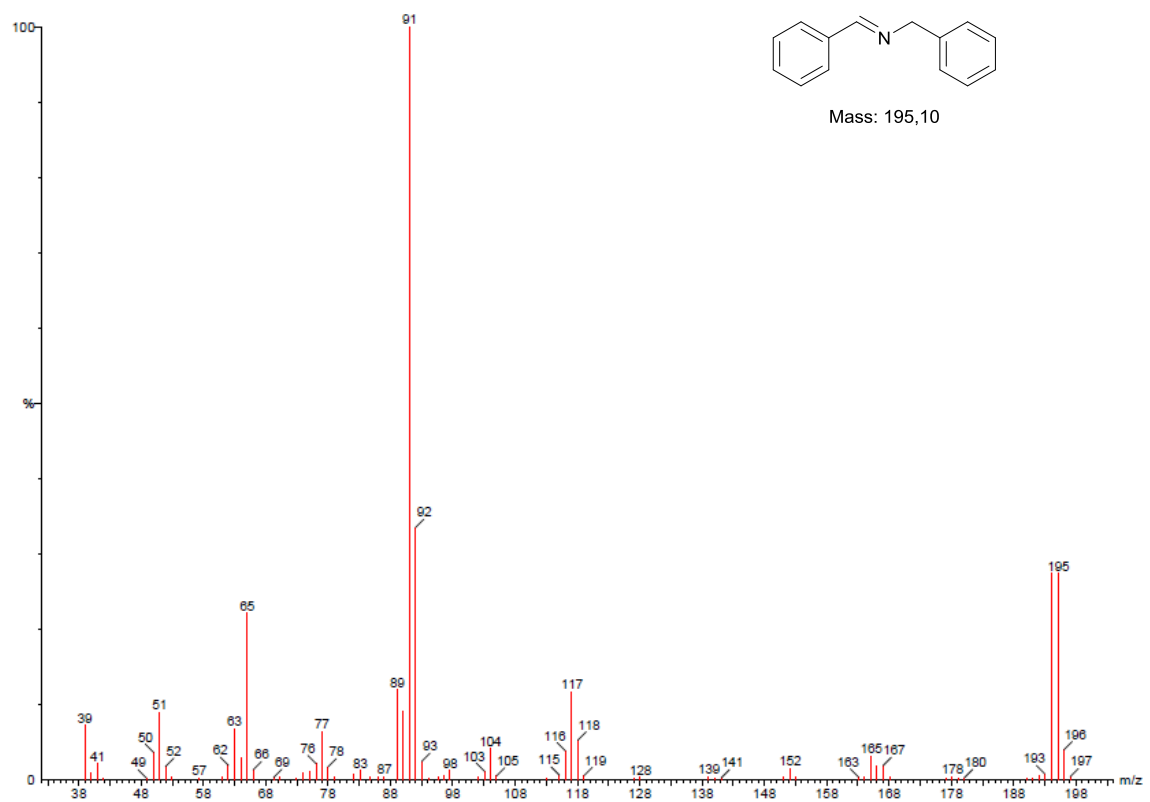

Figure 17 MS of N-benzyl-1-phenylmethanimine

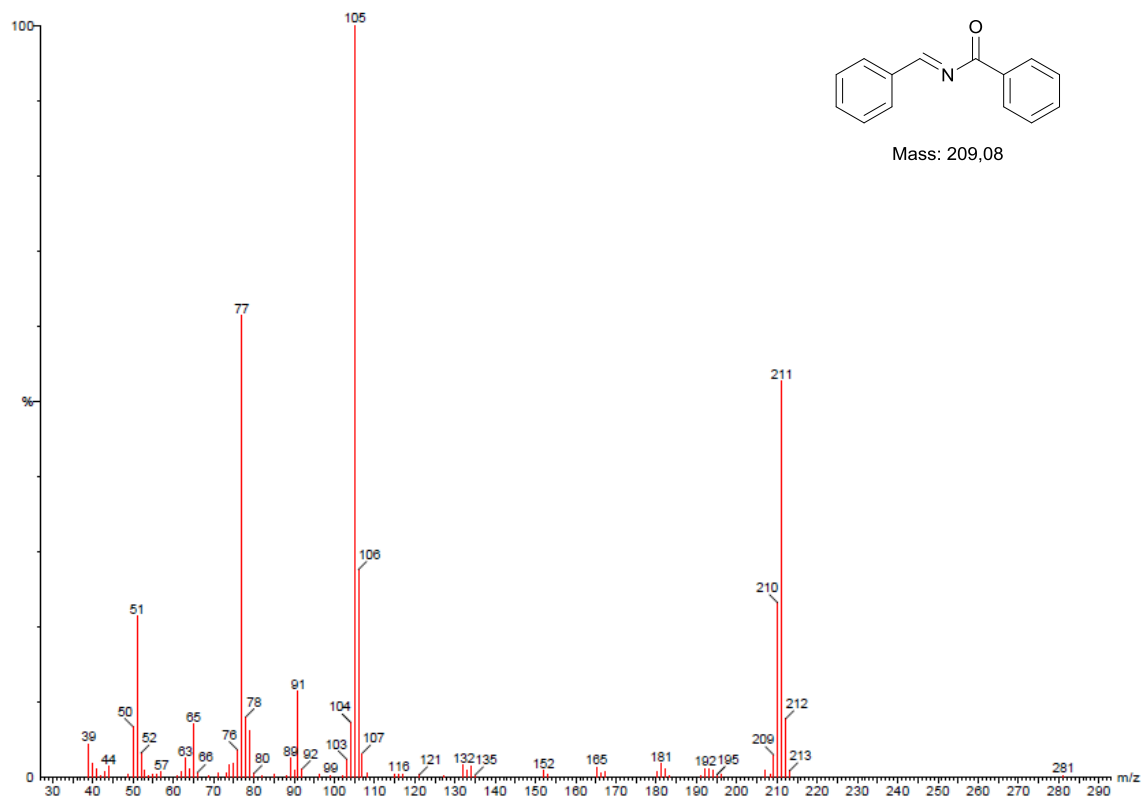

Figure 18 MS of *N*-benzylidenebenzamide

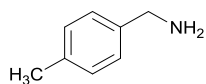

**4-methylbenzylamine**

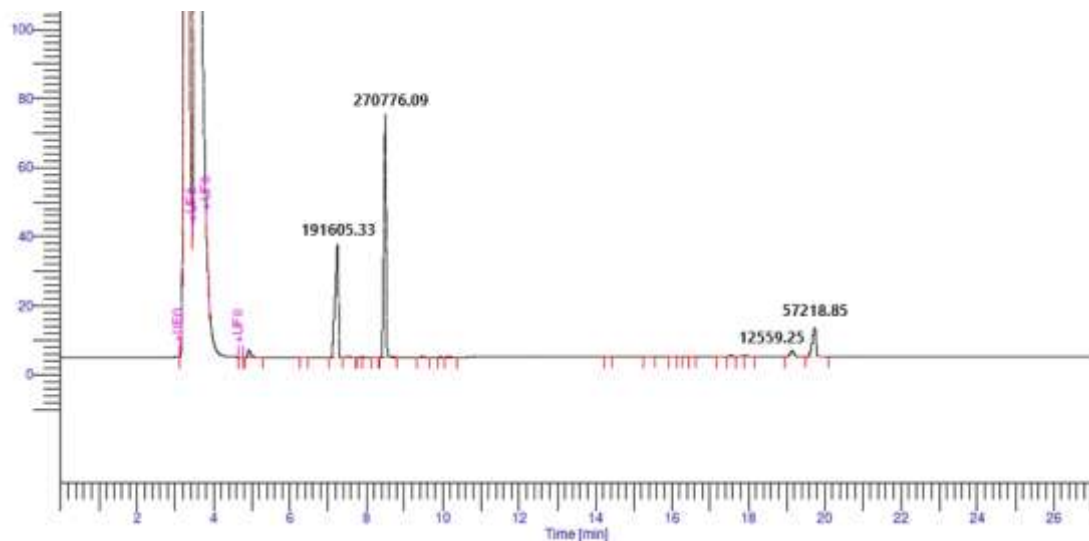

Figure 19 **GC-FID**, 3 – 4.7 min.: solvents (chloroform and <sup>t</sup>BuOH), 4.99 min.: *p*-cymene (from catalyst), 7.3 min.: hexadecane (internal standard), 8.5 min.: benzonitrile, 19.2 min.: amide, 19.7 min.: imine

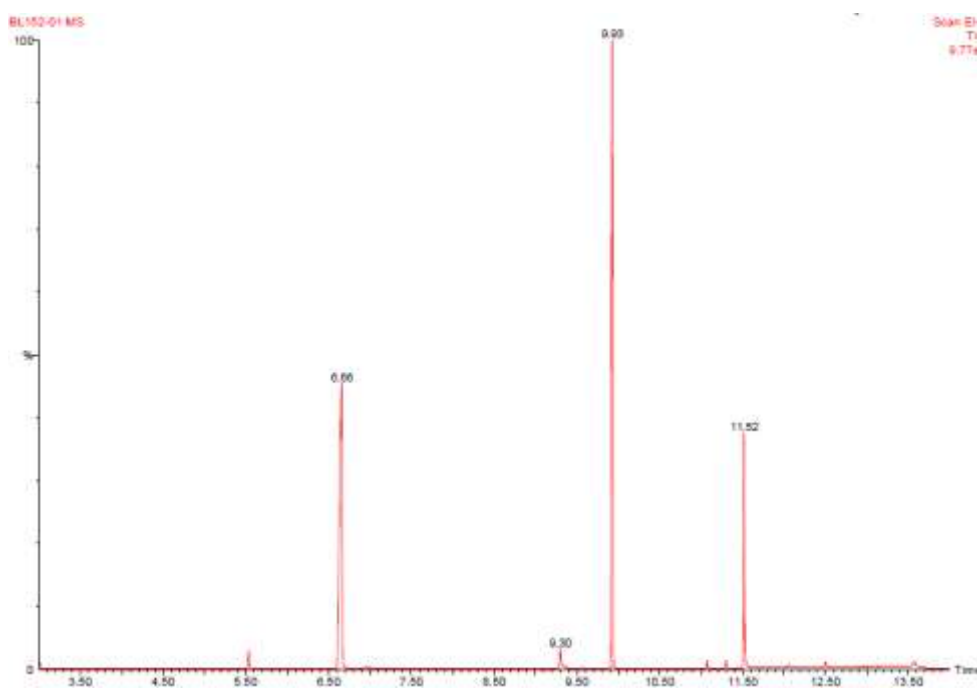

Figure 20 **GC-MS**, Ca. 5.5 min.: *p*-cymene (from catalyst), 6.66 min.: 4-methylbenzonitrile, 9.3 min.: 4-Methylbenzamide, 9.92 min.: hexadecane (internal standard), 11.52 min.: *N*-(4-methylbenzyl)-1-(*p*-tolyl)methanimine



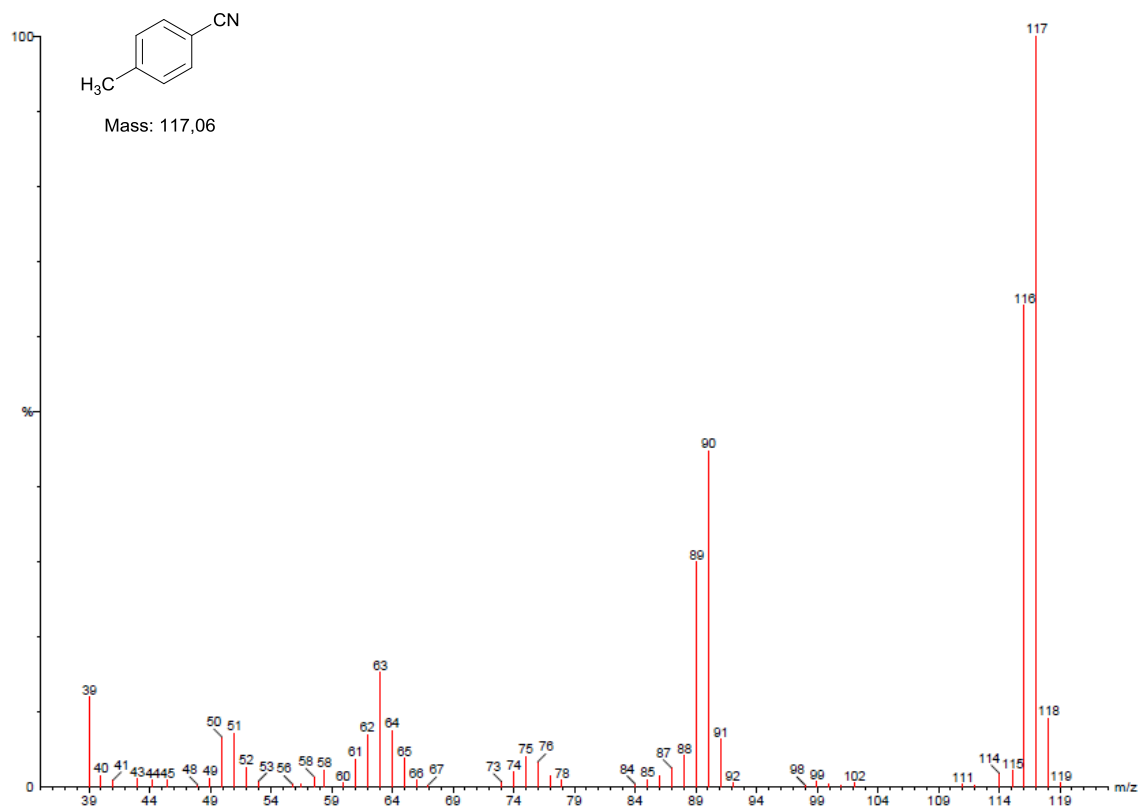

Figure 21 MS of 4-methylbenzonitrile

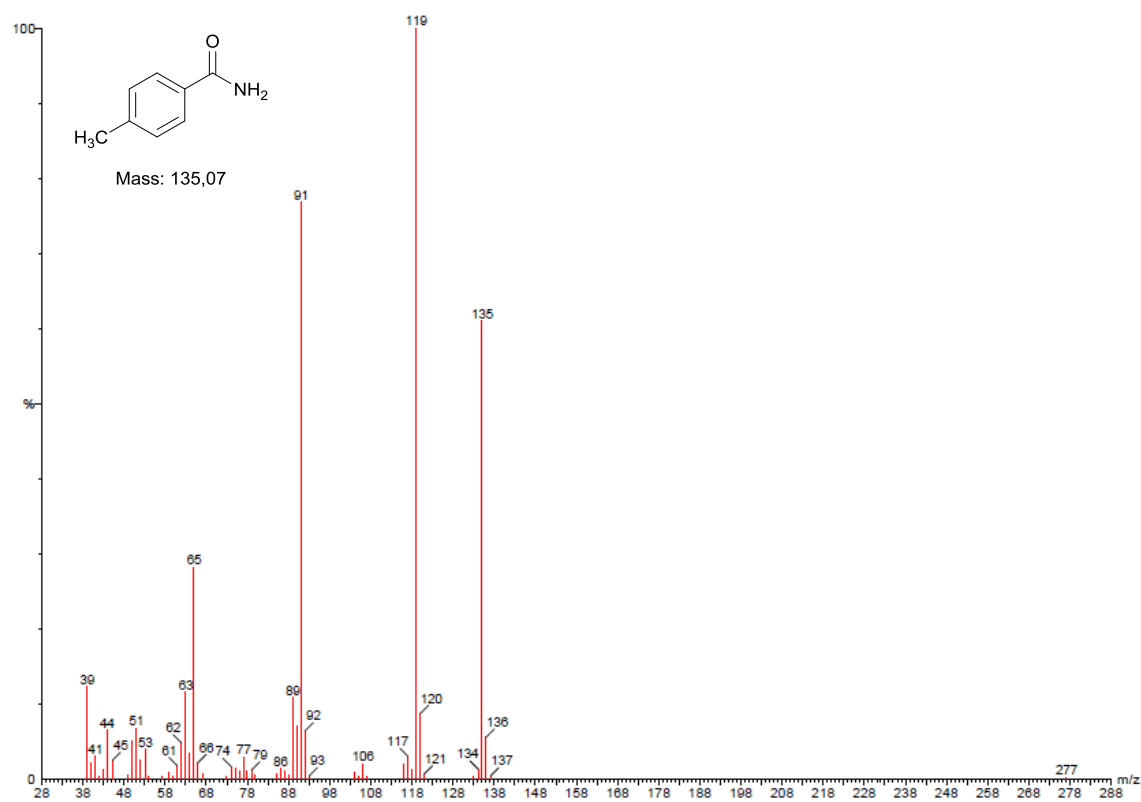

Figure 22 4-methylbenzamide

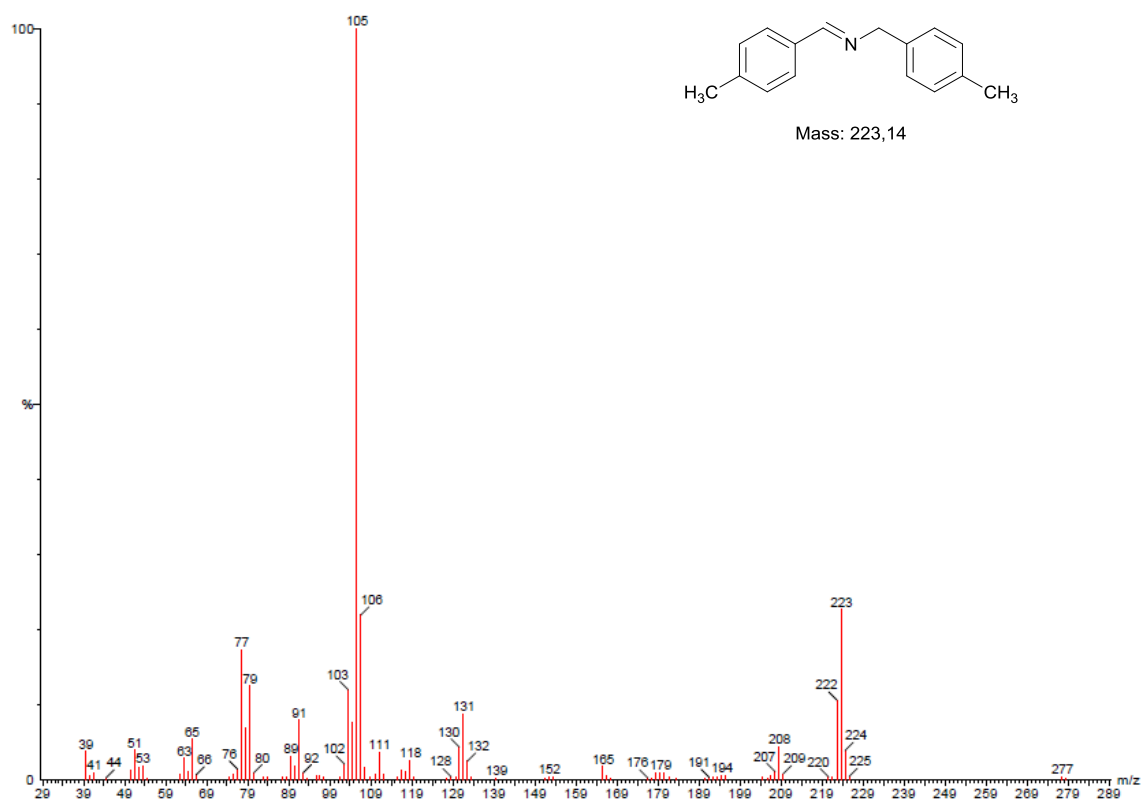

Figure 23 *N*-(4-methylbenzyl)-1-(*p*-tolyl)methanimine

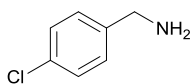

**4-Chlorobenzylamine**

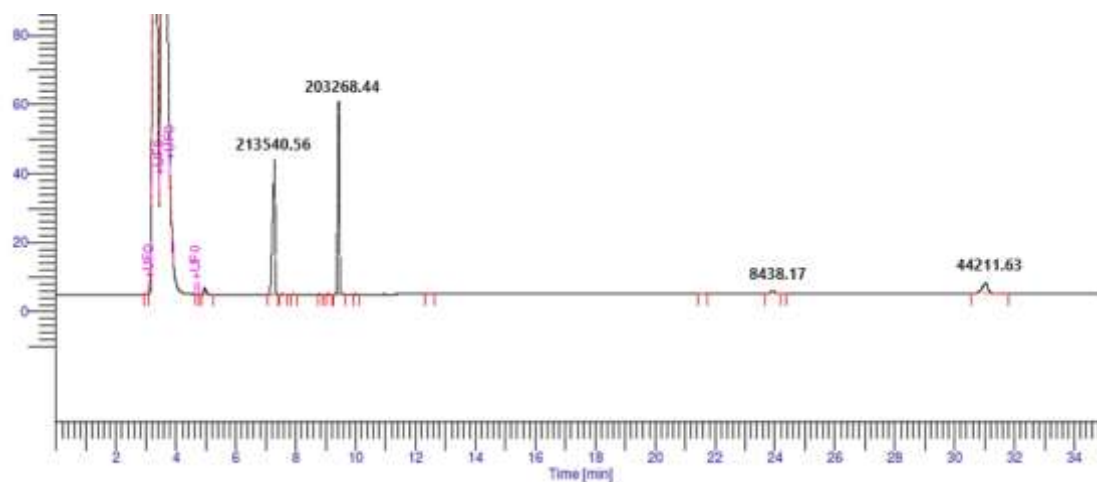

Figure 24 **GC-FID**, 3 – 4.7 min.: solvents (chloroform and <sup>t</sup>BuOH), 4.99 min.: *p*-cymene (from catalyst), 7.3 min.: hexadecane (Internal Standard), 9.4 min.: benzonitrile, 23.9 min.: amide, 31 min.: imine

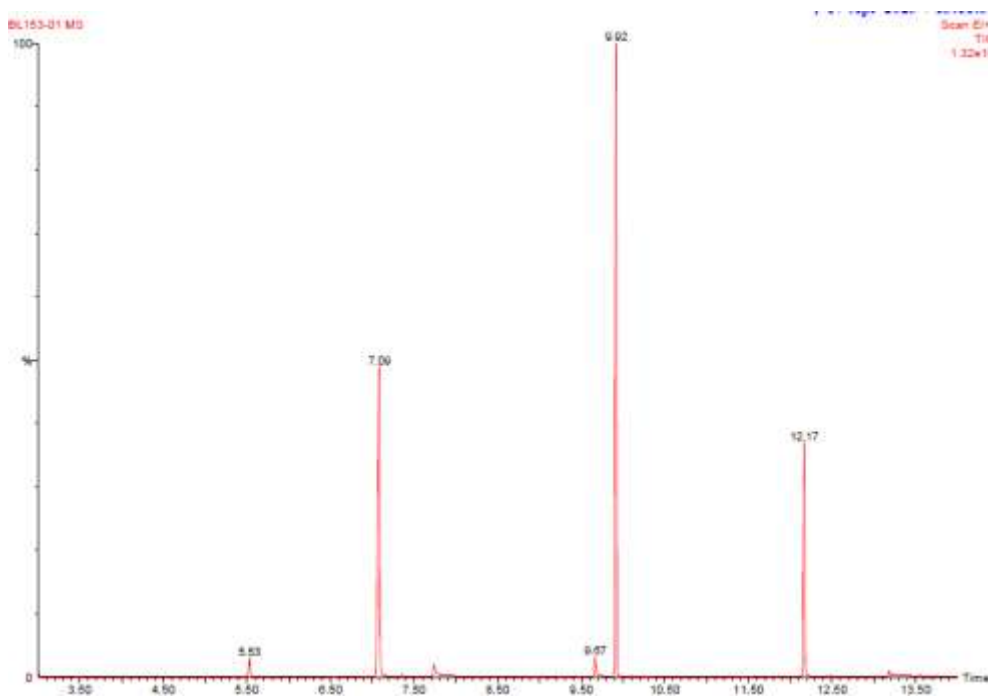

Figure 25 **GC-MS**, Ca. 5.5 min.: *p*-cymene (from catalyst), 7.09 min.: 4-chlorobenzonitrile, 7.74 min.: 4-chlorobenzylamine, 9.67 min.: 4-chlorobenzamide, 9.92 min.: hexadecane (internal standard), 12.17 min.: *N*-(4-chlorobenzyl)-1-(4-chlorophenyl)methanimine

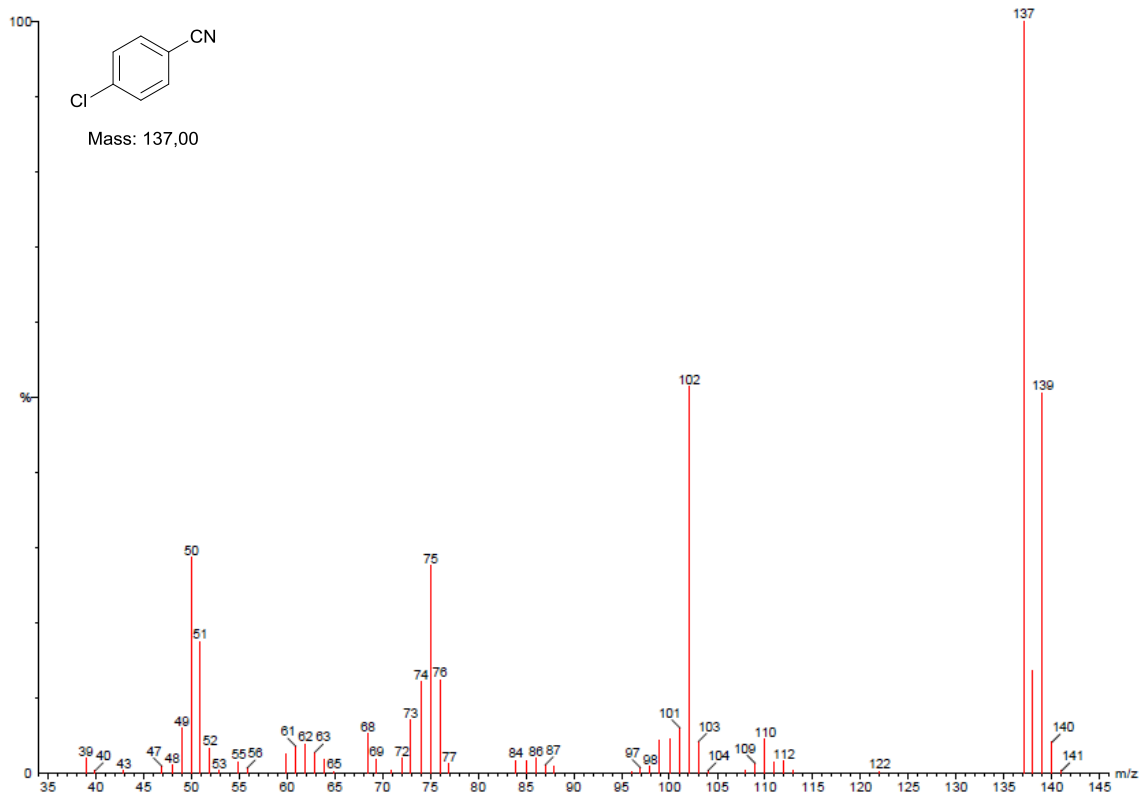

Figure 26 4-MS of chlorobenzonitrile

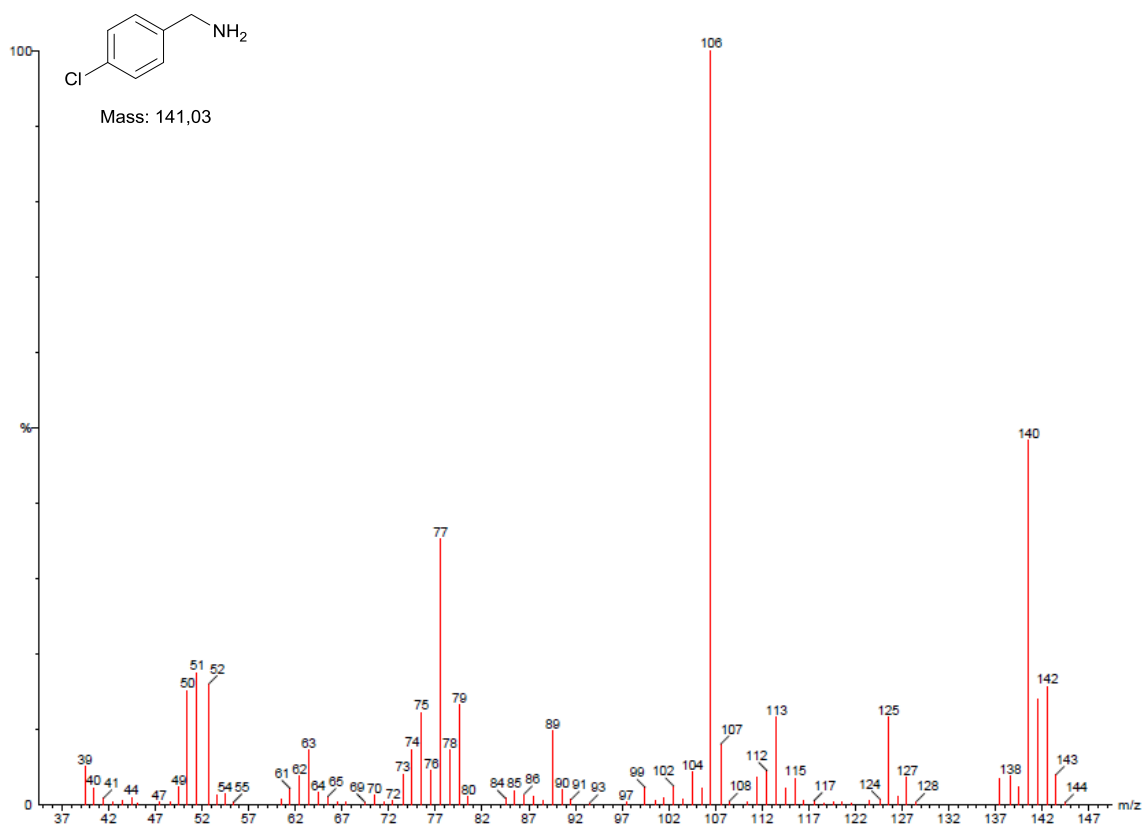

Figure 27 MS of -chlorobenzylamine

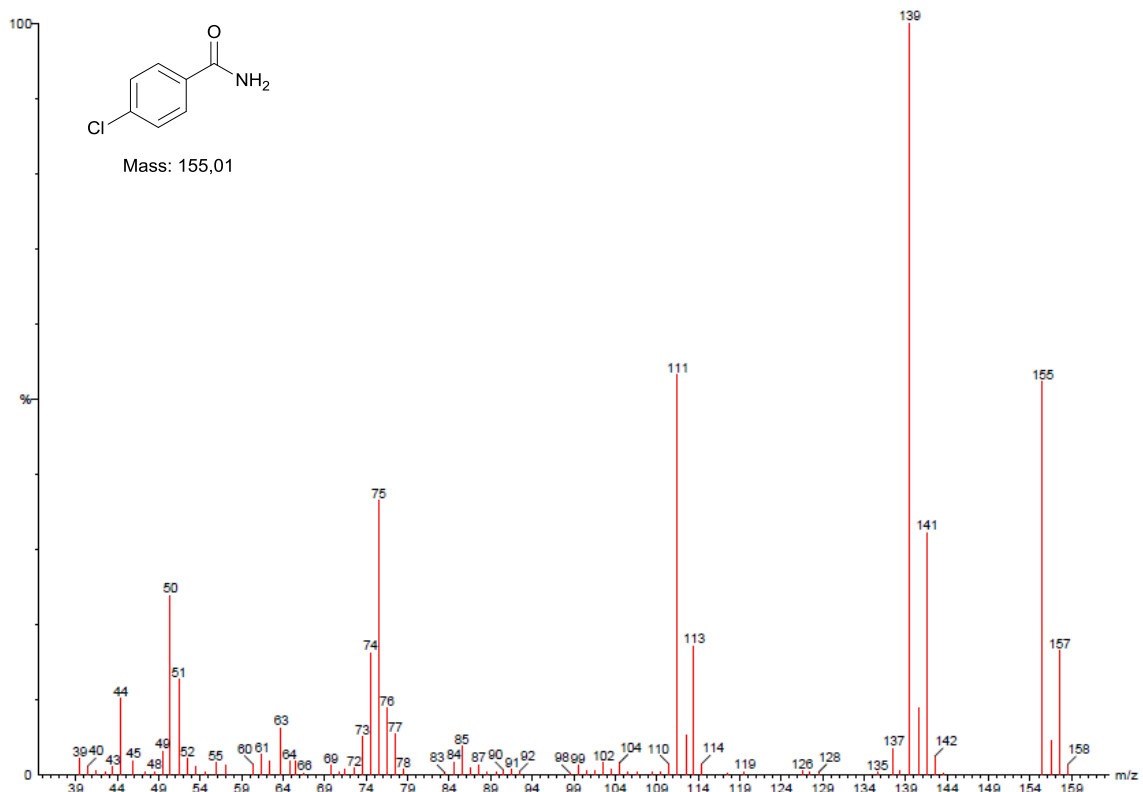

Figure 28 MS of 4-chlorobenzamide

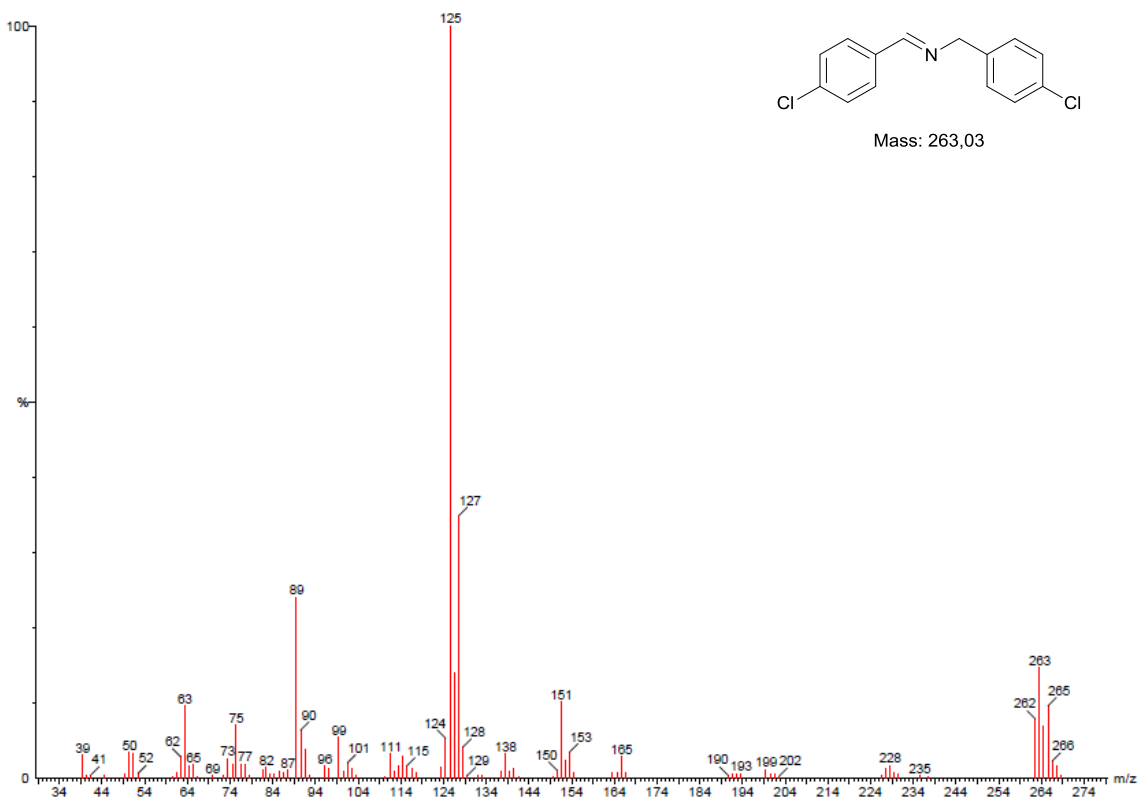

Figure 29 MS of -(4-chlorobenzyl)-1-(4-chlorophenyl)methanimine

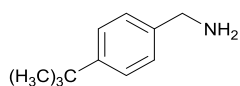

**4-Tertbutylbenzylamine**

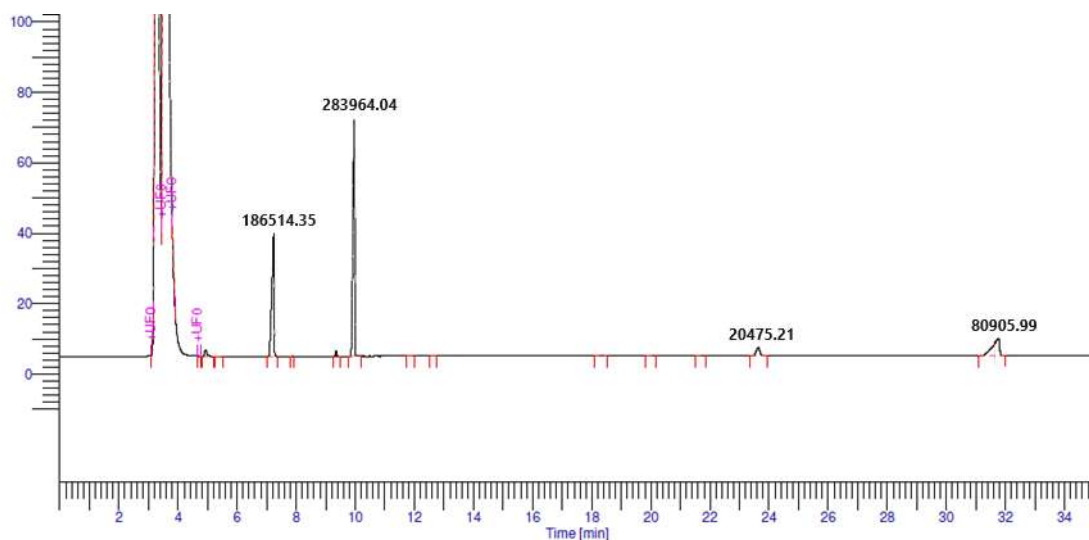

Figure 30 **GC-FID**, 3 – 4.7 min.: Solvents (Chloroform and <sup>t</sup>BuOH), 4.9 min.: *p*-cymene (from catalyst), 7.2 min.: hexadecane (internal standard), 9.34 min.: benzylamine, 9.95 min.: benzonitrile, 23.6 min.: benzamide, 31.7 min.: imine

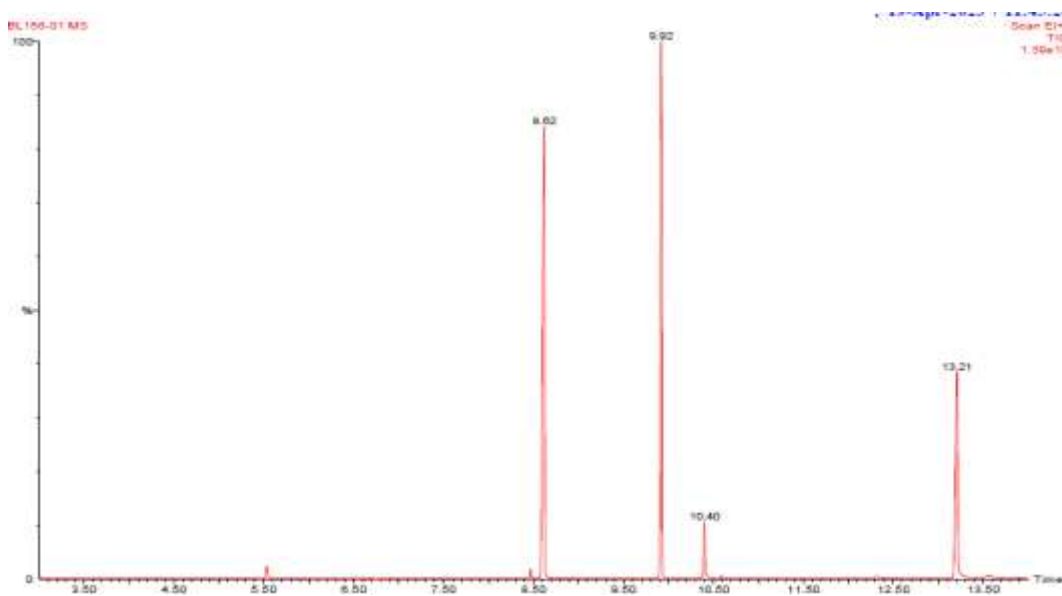

Figure 31 **GC-MS**, Ca. 5.5 min.: *p*-cymene (from catalyst), 8.47 min.: 4-tertbutylbenzylamine, 8.62 min.: 4-tertbutylbenzonitrile, 9.92 min.: hexadecane (internal standard), 10.4 min.: 4-tertbutylbenzamide, 13.21 min.: *N*-(4-(tert-butyl)benzyl)-1-(4-(tert-butyl)phenyl)methanimine

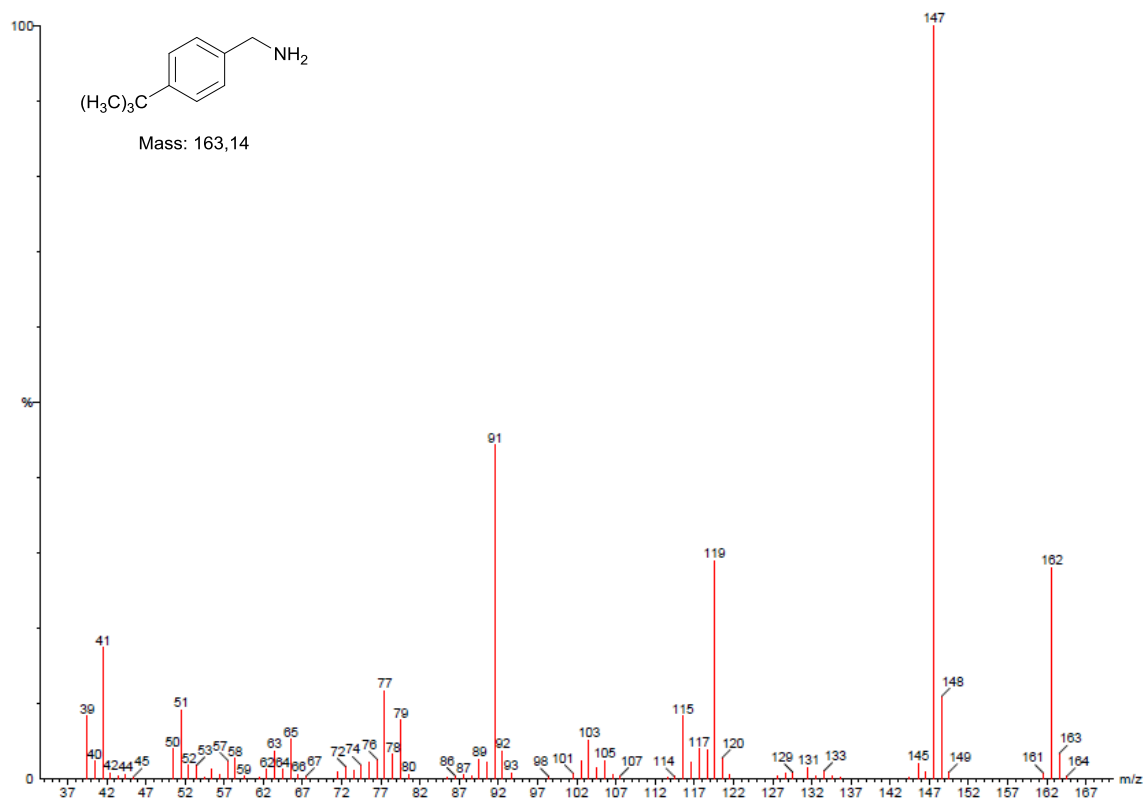

Figure 32 MS of 4-tertbutylbenzylamine

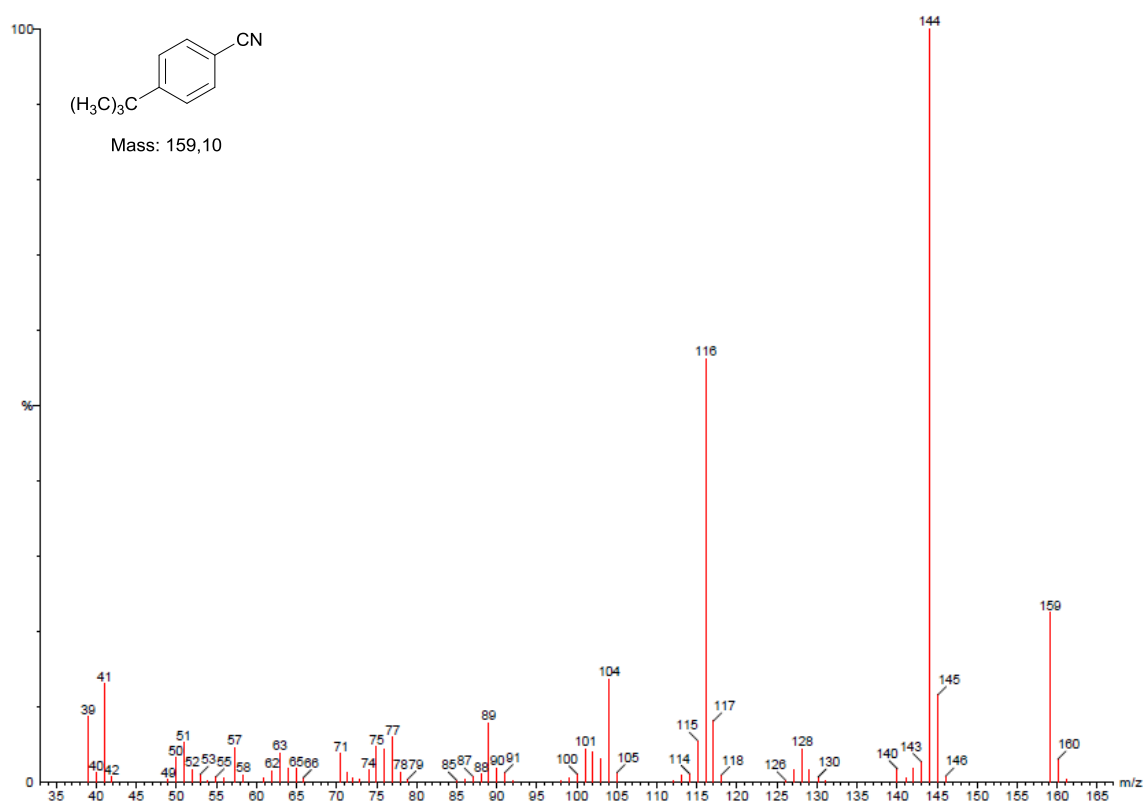

Figure 33 MS of 4-tertbutylbenzotrile

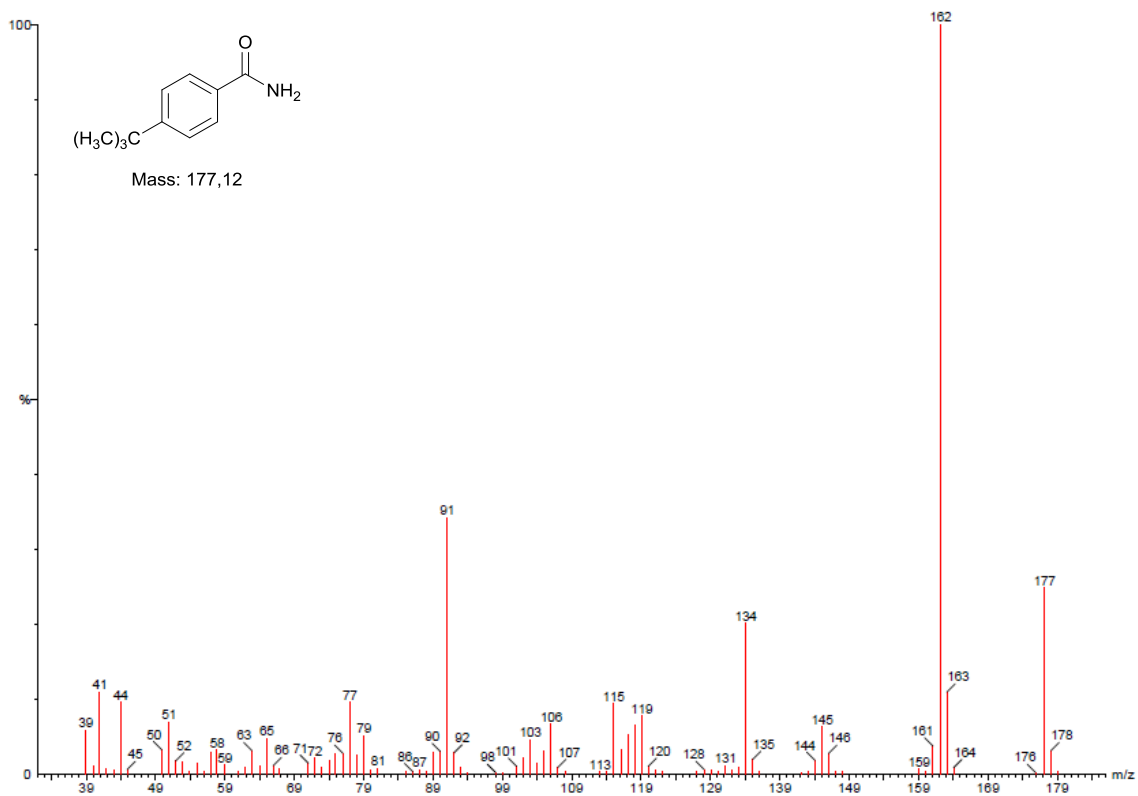

Figure 34 MS of 4-tertbutylbenzamide

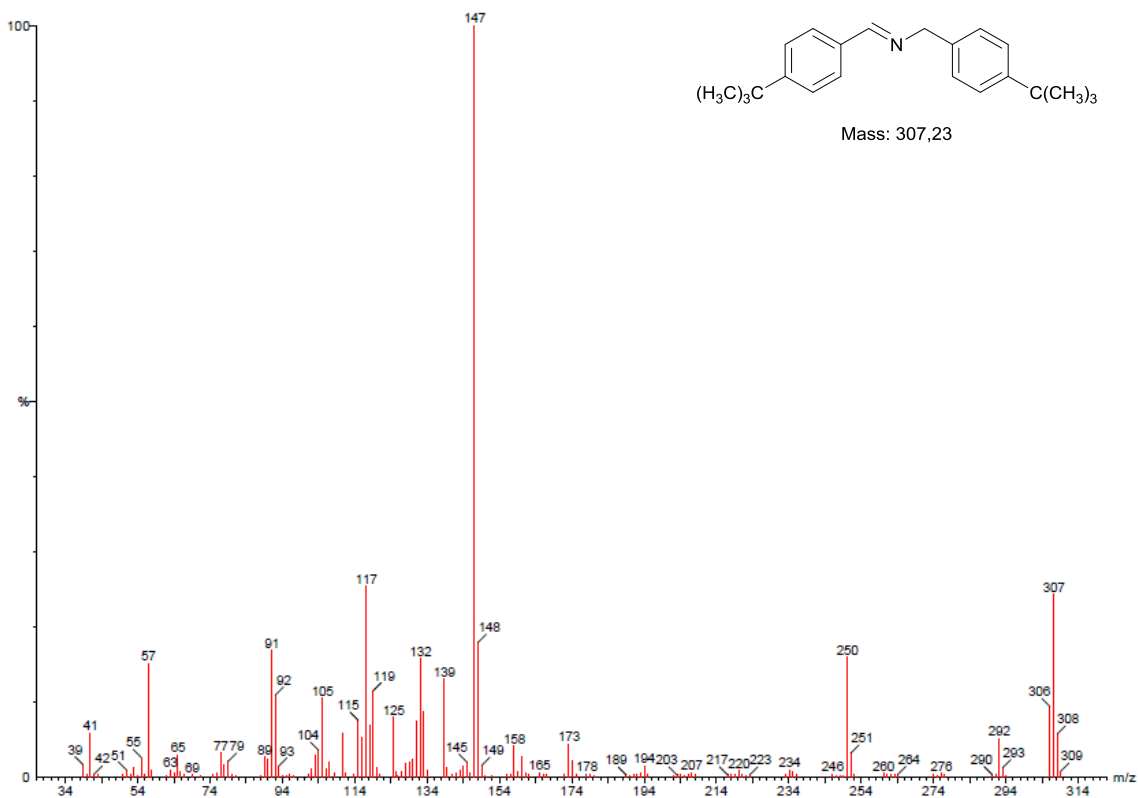

Figure 35 MS of *N*-(4-(tert-butyl)benzyl)-1-(4-(tert-butyl)phenyl)methanimine



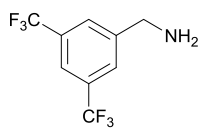

**3,5-Bis(trifluoromethyl)benzylamine**

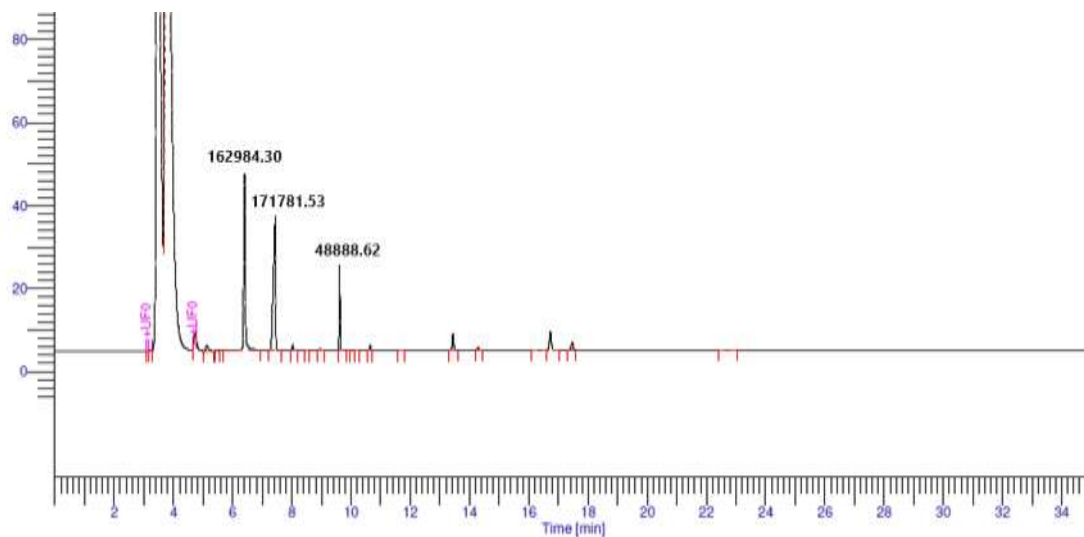

Figure 36 **GC-FID**, 3 – 4.7 min.: solvents (chloroform and <sup>t</sup>BuOH), 5.1 min.: *p*-cymene (from catalyst), 6.4 min.: 3,5-bis(trifluoromethyl)benzonitrile, 7.4 min.: hexadecane (internal standard), 9.6 min.: 3,5-bis(trifluoromethyl)benzylamine. The small signals of 4.7 min., 8 min. and between 10.6 and 17.5 min. were neglected.

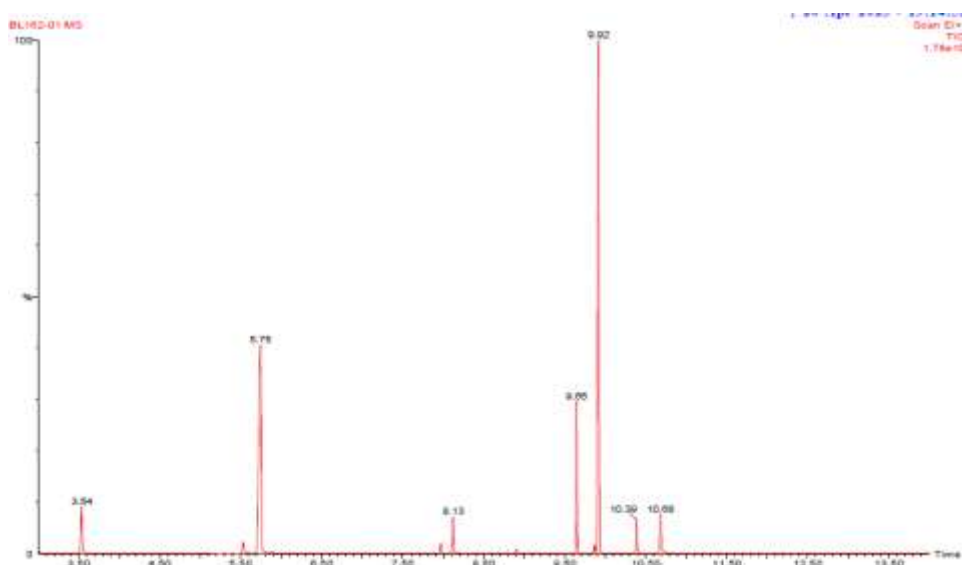

Figure 37 **GC-MS**, ca. 5.5 min.: *p*-cymene (from catalyst), 3.54 min.: 3,5-bis(trifluoromethyl)benzonitrile, 5.75 min.: 3,5-Bis(trifluoromethyl)benzylamine, 8.13 min.: 3,5-Bis(trifluoromethyl)benzylamide, 9.65 min.: *N*-(3,5-bis(trifluoromethyl)benzyl)-1-(3,5-bis(trifluoromethyl)phenyl)methanimine, 9.92 min.: hexadecane (internal standard), 10.39 min.: *N*-(3,5-bis(trifluoromethyl)benzylidene)-3,5-bis(trifluoromethyl)benzamide, 10.68 min.: *N*-(3,5-bis(trifluoromethyl)benzyl)-3,5-bis(trifluoromethyl)benzimidic acid.

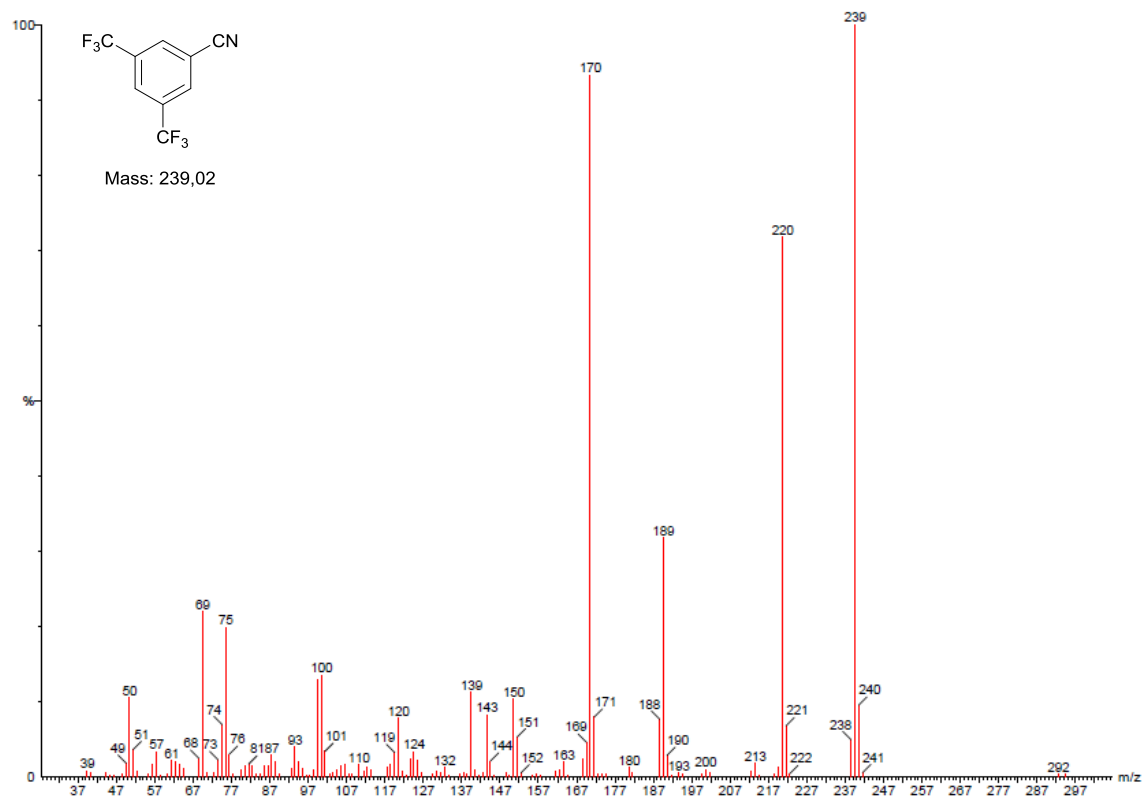

Figure 38 MS of 3,5-bis(trifluoromethyl)benzonitrile

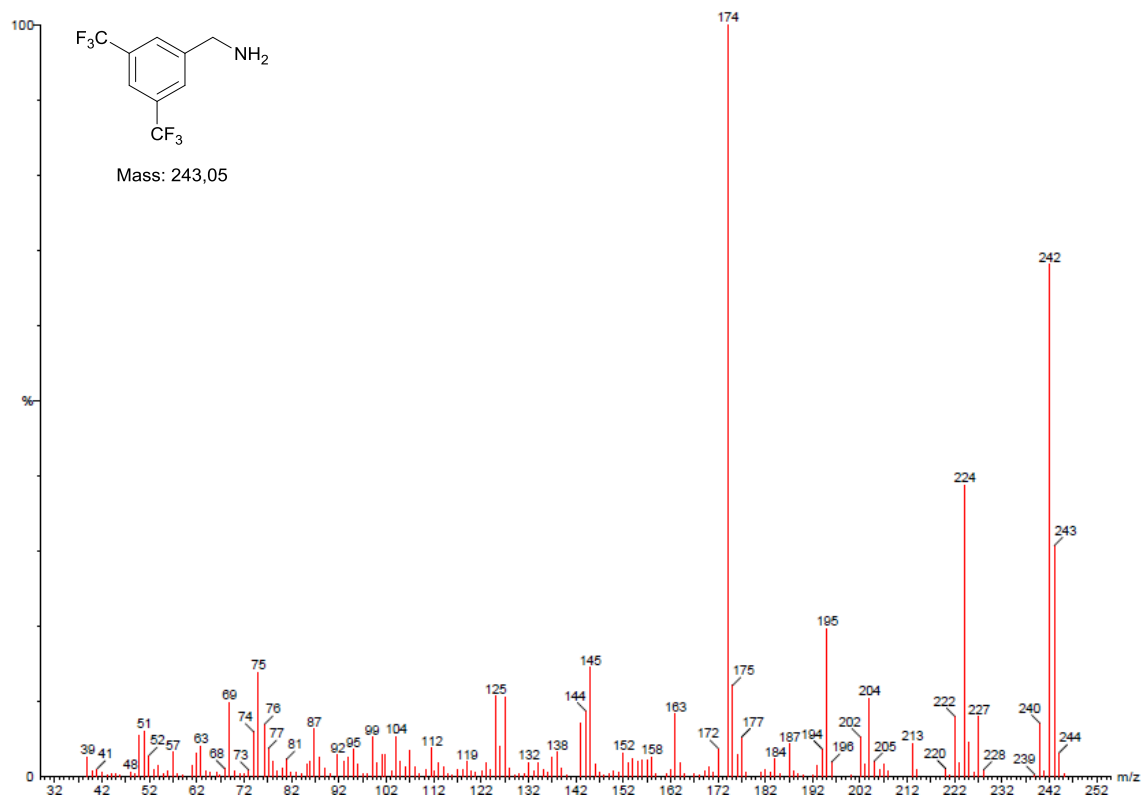

Figure 39 MS of 3,5-Bis(trifluoromethyl)benzylamine

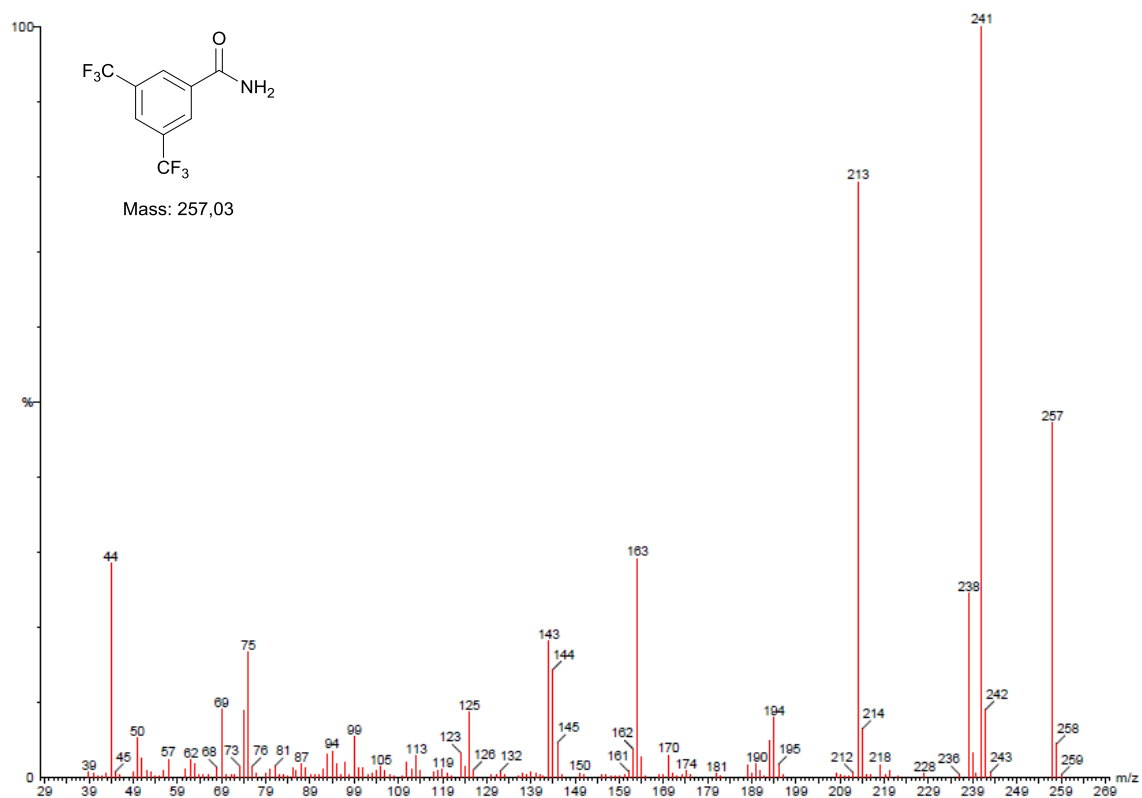

Figure 40 MS of 3,5-bis(trifluoromethyl)benzamide

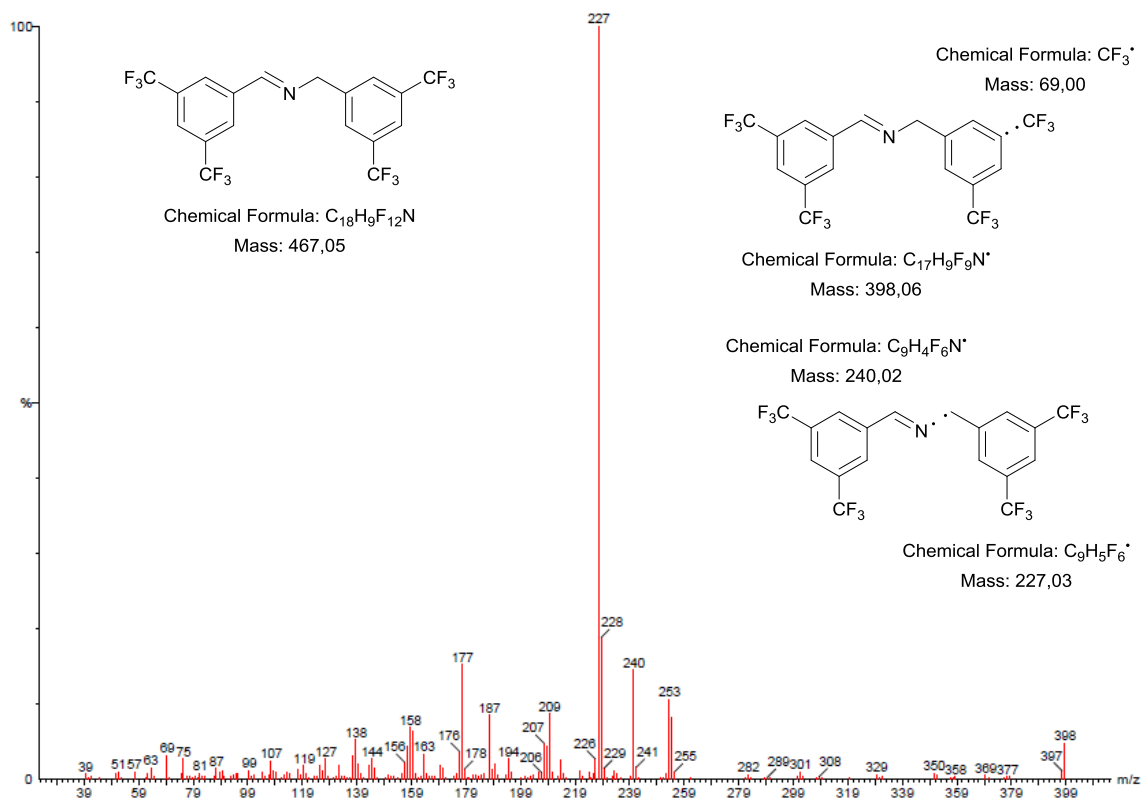

Figure 41. MS of N-(3,5-bis(trifluoromethyl)benzyl)-1-(3,5-bis(trifluoromethyl)phenyl) methanimine

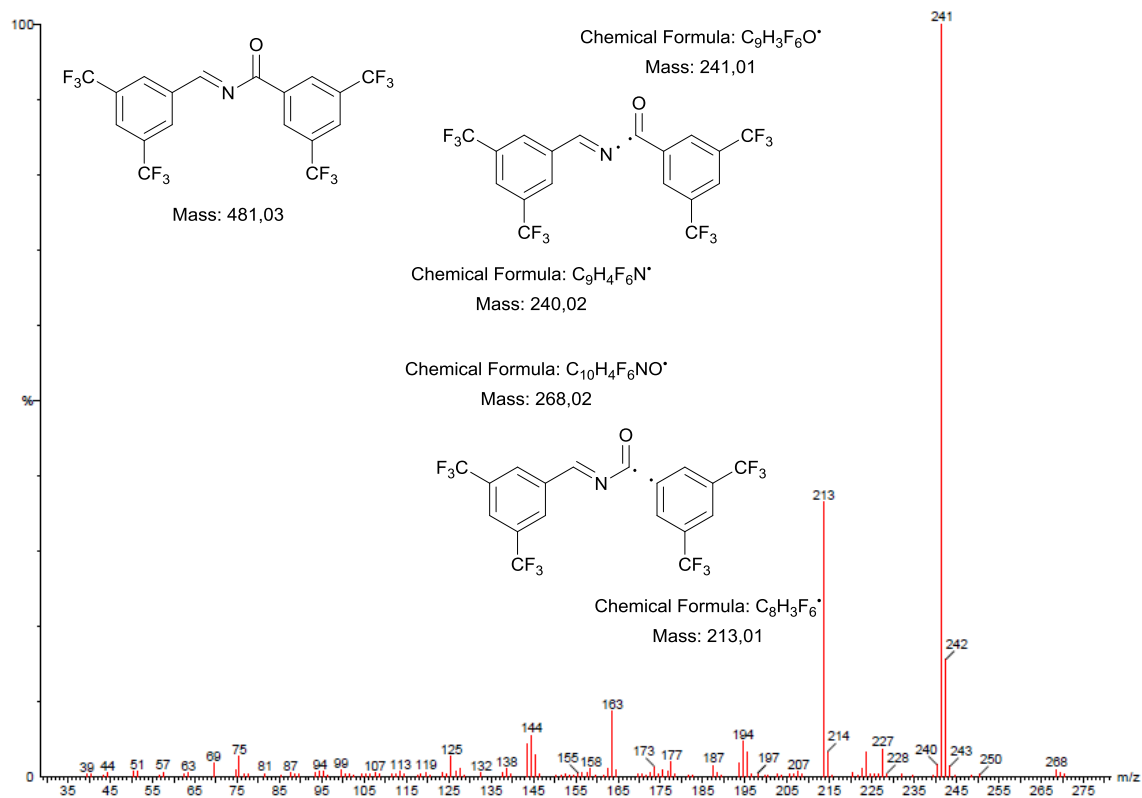

Figure 42. MS of N-(3,5-bis(trifluoromethyl)benzylidene)-3,5-bis(trifluoromethyl)benzamide

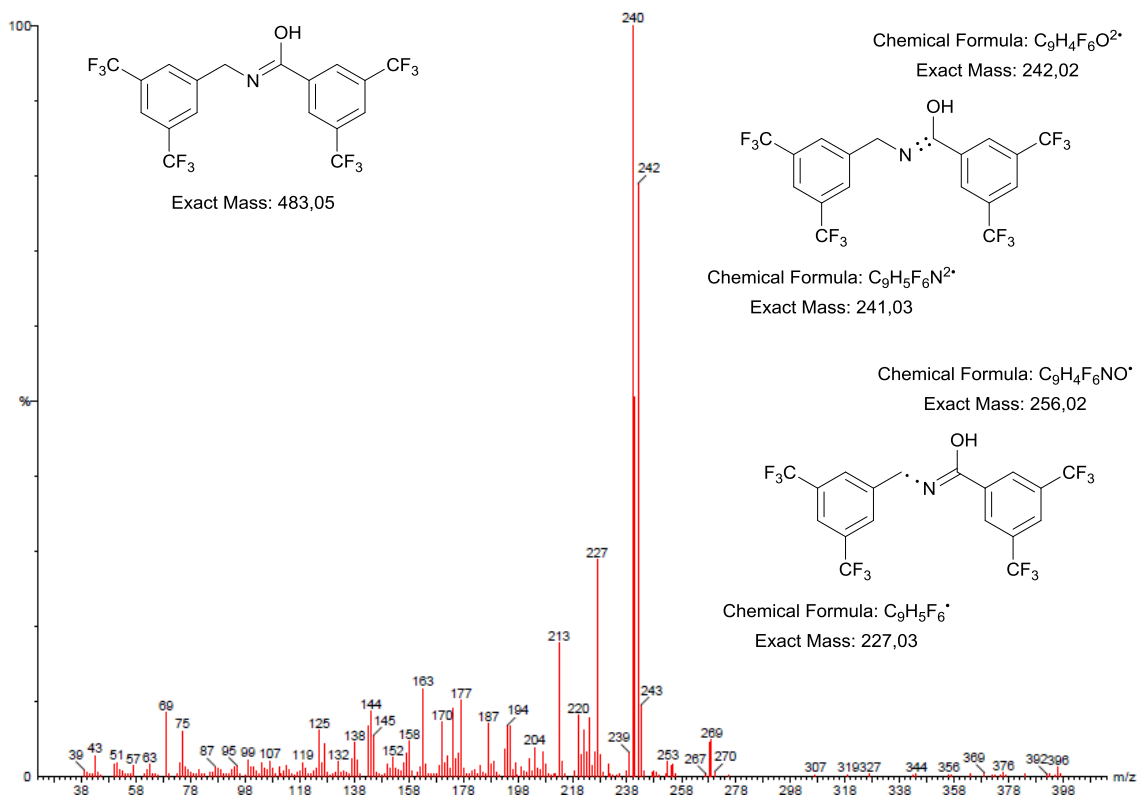

Figure 43. MS of N-(3,5-bis(trifluoromethyl)benzyl)-3,5-bis(trifluoromethyl)benzimidic acid

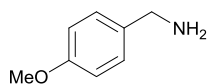

**4-methoxybenzylamine**

**GC-FID**

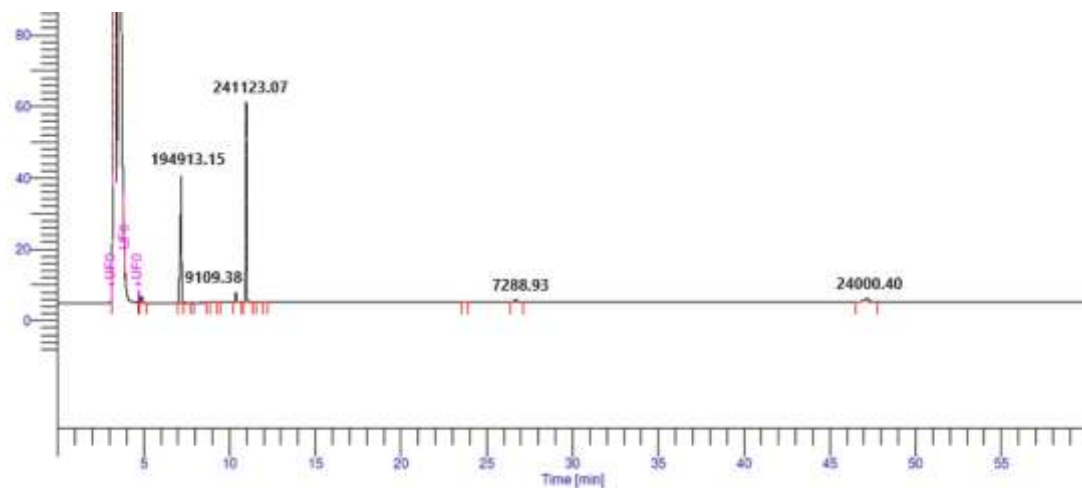

Figure 44 **GC-FID**, 3 – 4.7 min.: solvents (chloroform and <sup>t</sup>BuOH), 4.9 min.: *p*-cymene (from catalyst), 7.2 min.: hexadecane (internal standard), 10.4 min.: 4-methoxybenzylamine, 11 min.: 4-methoxybenzotrile, 26.7 min.: 4-methoxybenzamide, 47.2 min.: *N*-(4-methoxybenzyl)-1-(4-methoxyphenyl)methanimine

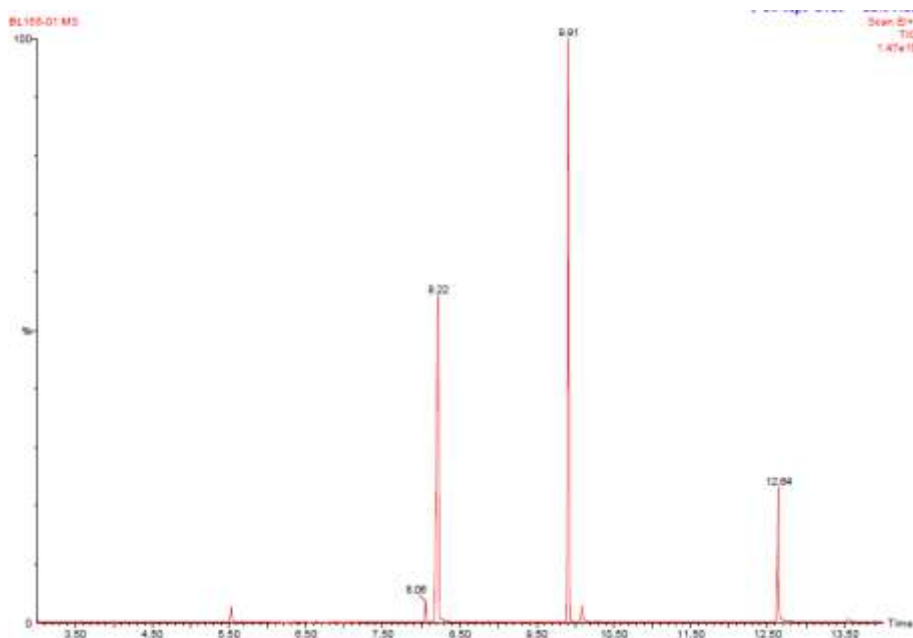

Figure 45 **GC-MS**, ca. 5.5 min.: *p*-cymene (from catalyst), 8.06 min.: 4-methoxybenzylamine, 8.22 min.: 4-methoxybenzotrile, 9.92 min.: hexadecane (internal standard), 10.09 min.: 4-methoxybenzylamide, 12.64 min.: *N*-(4-methoxybenzyl)-1-(4-methoxyphenyl)methanimine

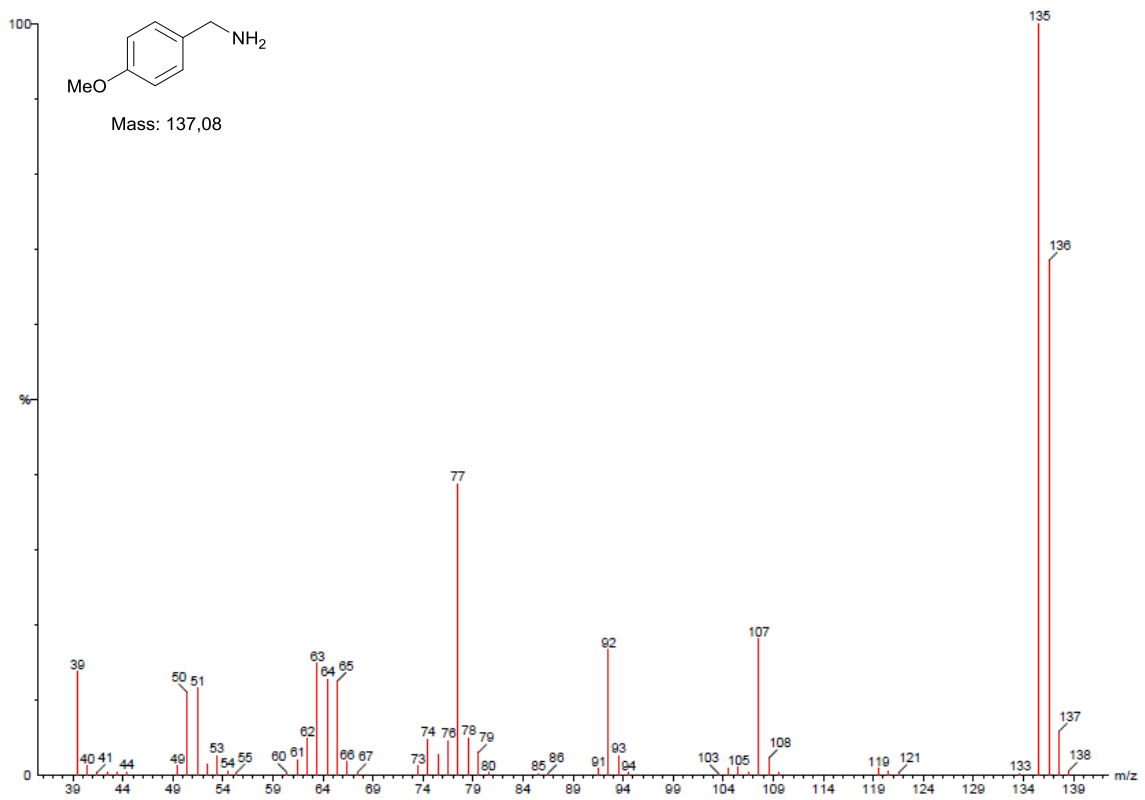

Figure 46 MS of 4-methoxybenzylamine

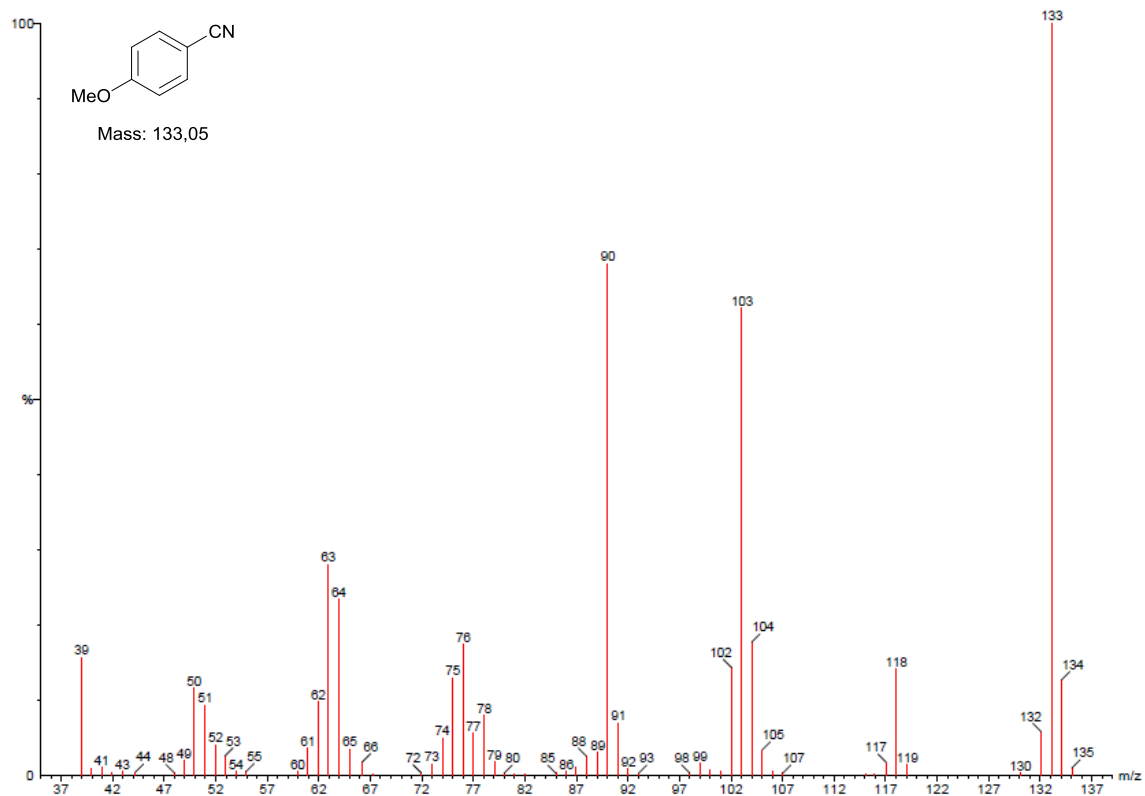

Figure 47 MS of 4-methoxybenzonitrile

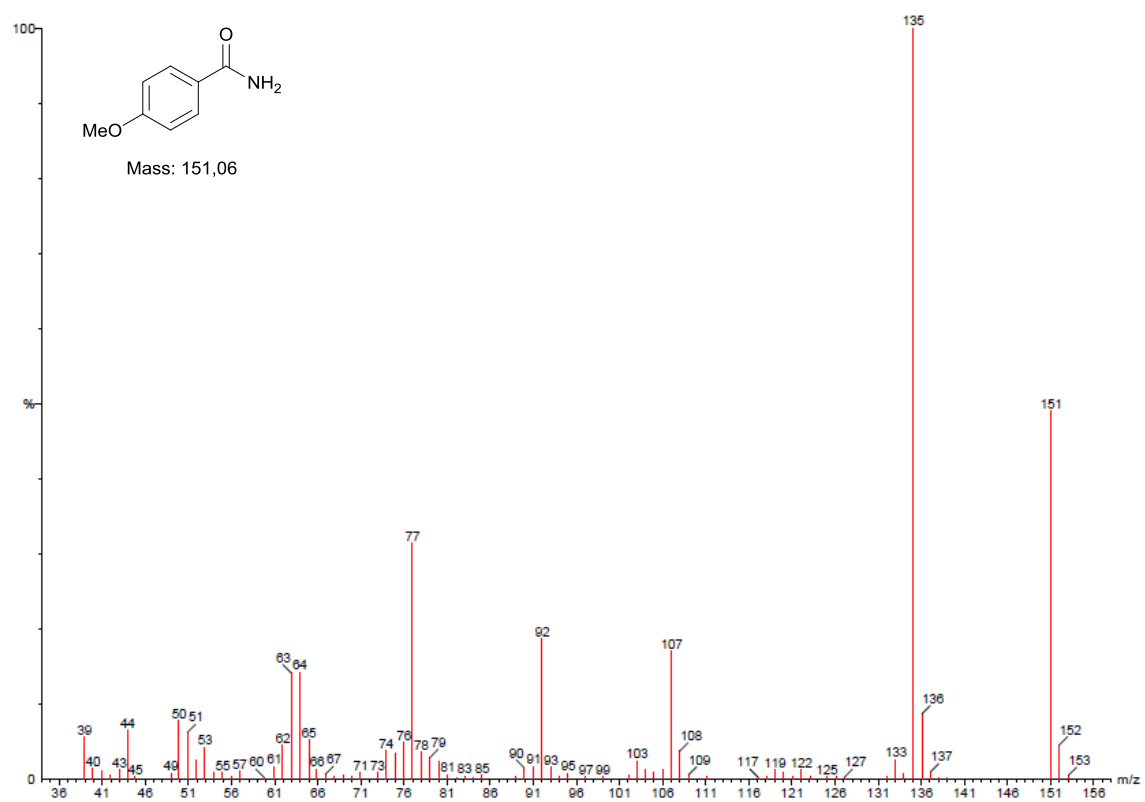

Figure 48 MS of 4-methoxybenzamide



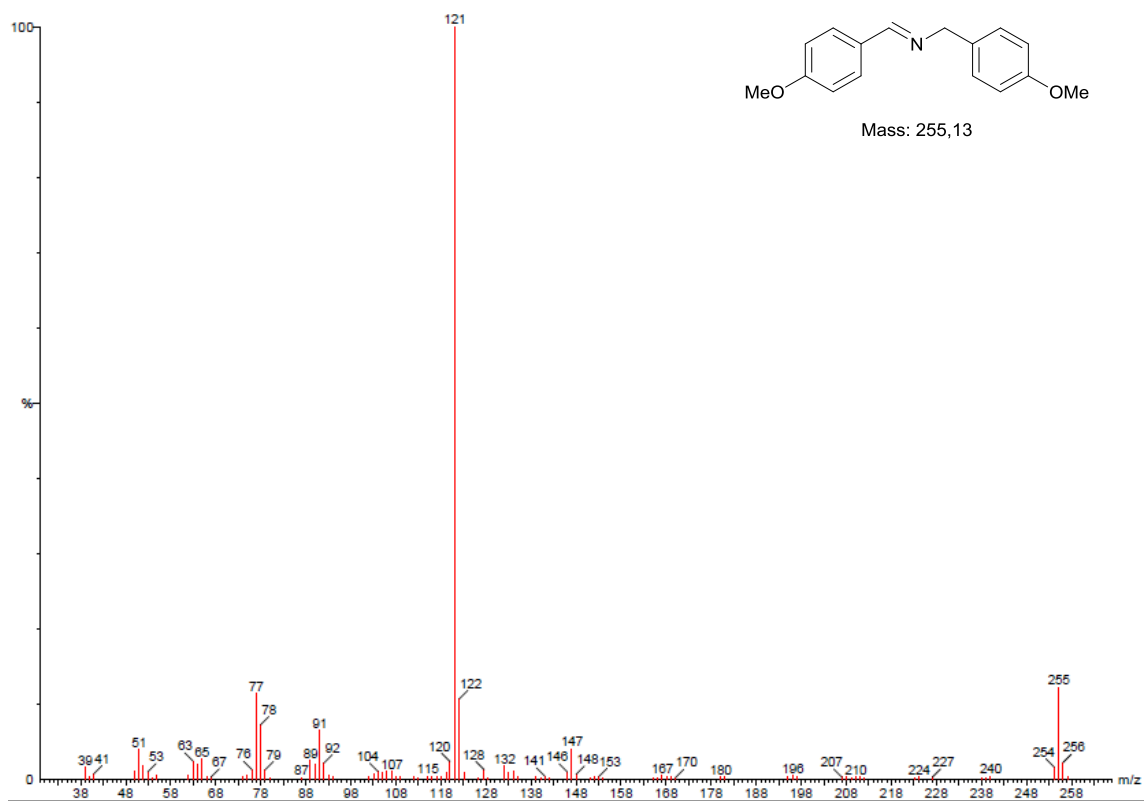

Figure 49 MS of *N*-(4-methoxybenzyl)-1-(4-methoxyphenyl)methanimine

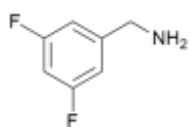

**3,5-Difluorobenzylamine**

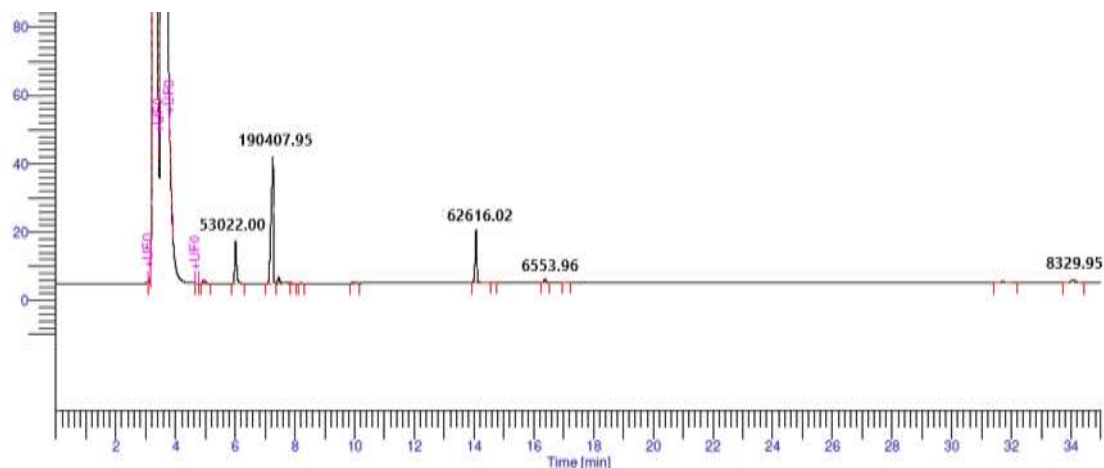

Figure 50 GC-FID, 3 – 4.7 min.: solvents (chloroform and <sup>t</sup>BuOH), 4.99 min.: p-cymene (from catalyst), 6.0 min.: 3,5-difluorobenzylamine, 7.3 min.: hexadecane (internal standard), 13.9 min.: 3,5-difluorobenzonitrile, 16.4 min.: 3,5-difluorobenzamide, 34 min.: N-(3,5-difluorobenzyl)-1-(3,5-difluorophenyl)methanimine

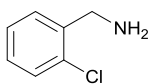

**2-Chlorobenzylamine**

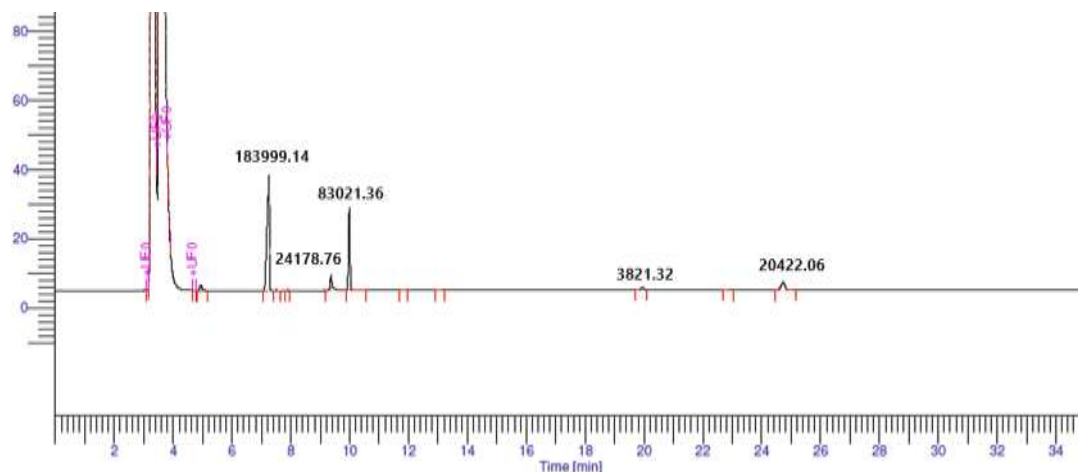

Figure 51 GC-FID, 3 – 4.7 min.: Solvents (Chloroform and <sup>t</sup>BuOH), 4.99 min.: p-cymene (from catalyst), 7.3 min.: hexadecane (internal standard), 9.4 min.: 2-chlorobenzylamine, 10 min.: 2-chlorobenzonitrile, 20 min.: 2-chlorobenzamide, 24.7 min.: N-(2-chlorobenzylidene)-2-chlorobenzylamine

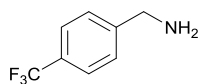

**4-Trifluorobenzylamine**

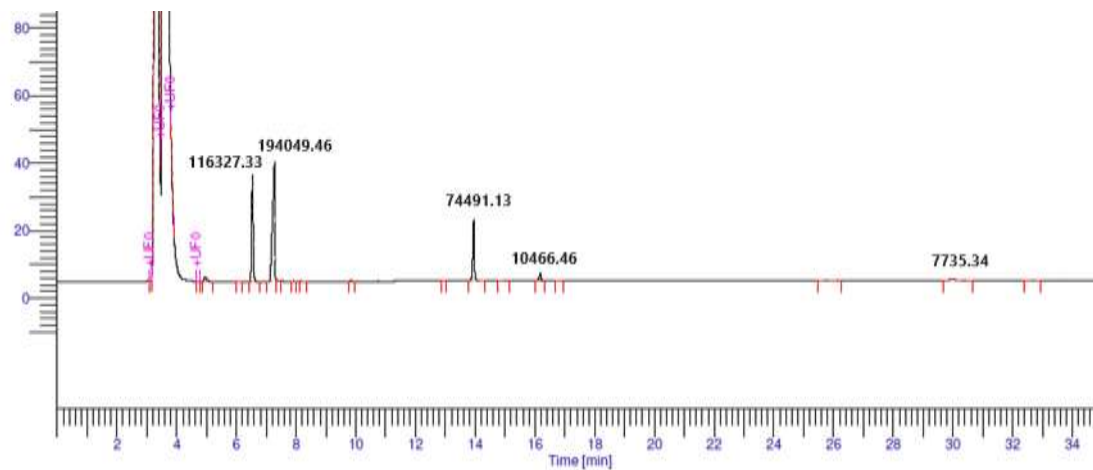

Figure 52 GC-FID, 3 – 4.7 min.: Solvents (Chloroform and <sup>t</sup>BuOH), 4.99 min.: p-cymene (from catalyst), 6.5 min.: benzylamine, 7.3 min.: hexadecane (internal standard), 13.9 min.: **4-trifluorobenzylamine**, 16.2 min.: **4-trifluorobenzamide**, 30 min.: N-(4-(trifluoromethyl)benzyl)-1-(4-(trifluoromethyl)phenyl)methanimine

### 3. Benzylamine oxidation in a sealed vessel with nitrous oxide

3.1. Optimisation of the benzylamine oxidation with the ruthenium complex  $\{[(p\text{-cymene})\text{Ru}](\mu\text{-H})(\mu\text{-Cl})(\mu\text{-HCO}_2)[\text{Ru}(p\text{-cymene})]\}\text{BF}_4$  (**Ru-II**; **RuBF<sub>4</sub>**) in sealed vessel with N<sub>2</sub>O (flask with high-vacuum teflon valve)

A 50 mL tube equipped with high-vacuum teflon valve was charged with 120  $\mu\text{L}$  (1 mmol) of benzylamine and 1 or 2 mL of tert-butanol. 3.2, 6.4 or 12.8 mg (0.005, 0.01 or 0.02 mmol) of complex **RuBF<sub>4</sub>** was employed as catalyst. The mixture was stirred under N<sub>2</sub>O. 100 mL of N<sub>2</sub>O was condensed into to the tube at -196°C. The specific conditions of catalyst, solvent, oxidant, temperature and time are given in Table 4 of the manuscript. The reaction products were identified by NMR spectroscopy and gas chromatography-mass spectrometry (GC-MS) and compared with authentic samples or literature data. The product selectivity was determined with GC-FID with hexadecane as internal standard. In addition, benzylamine and imine were also quantified by NMR with cyclohexane as an internal standard. Results are summarized in Table 4 of the manuscript.

### 3.2. Selected $^1\text{H}$ NMR analysis of benzylamine oxidation in sealed vessel (Table 4)

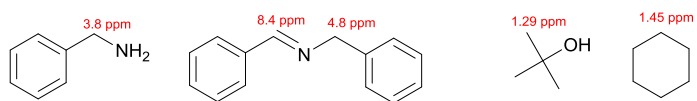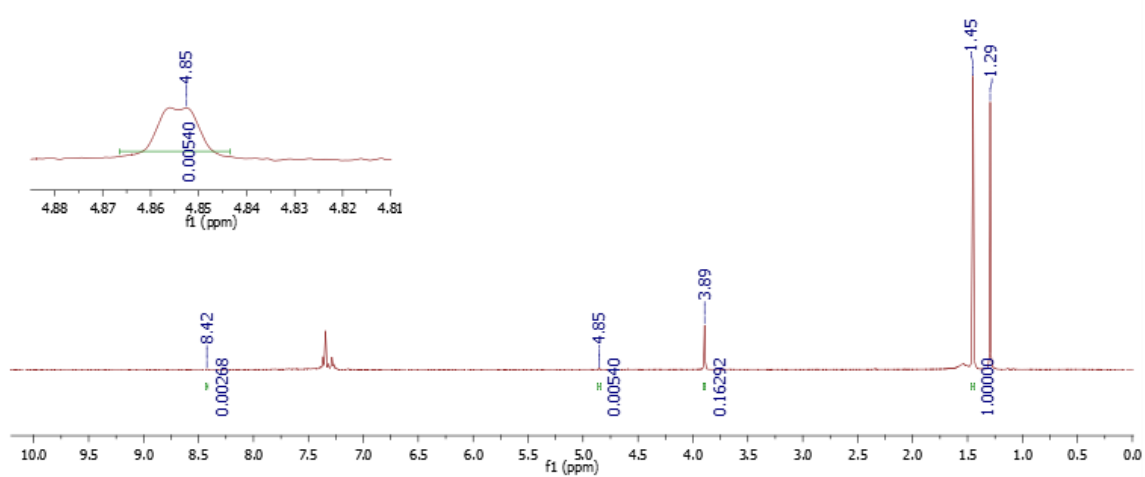

Figure 53 Entry 1

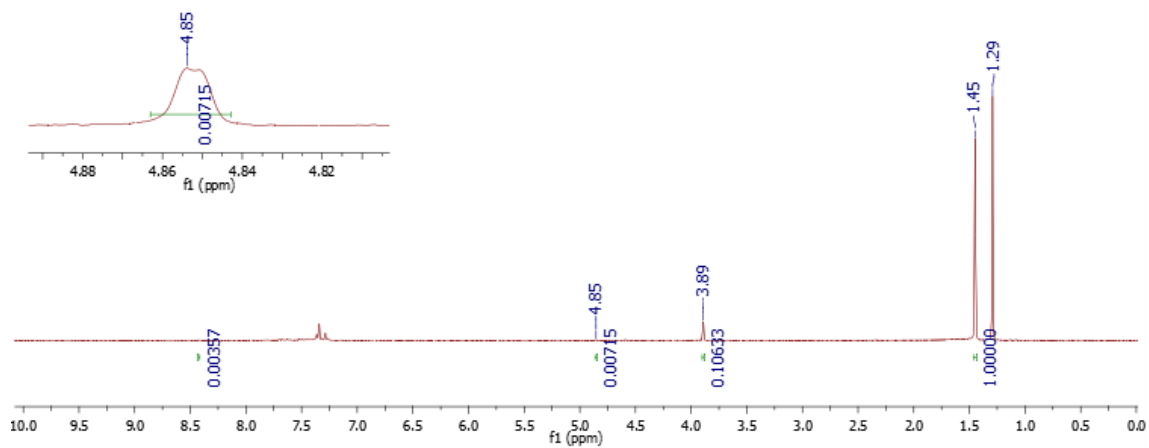

Figure 54 Entry 2

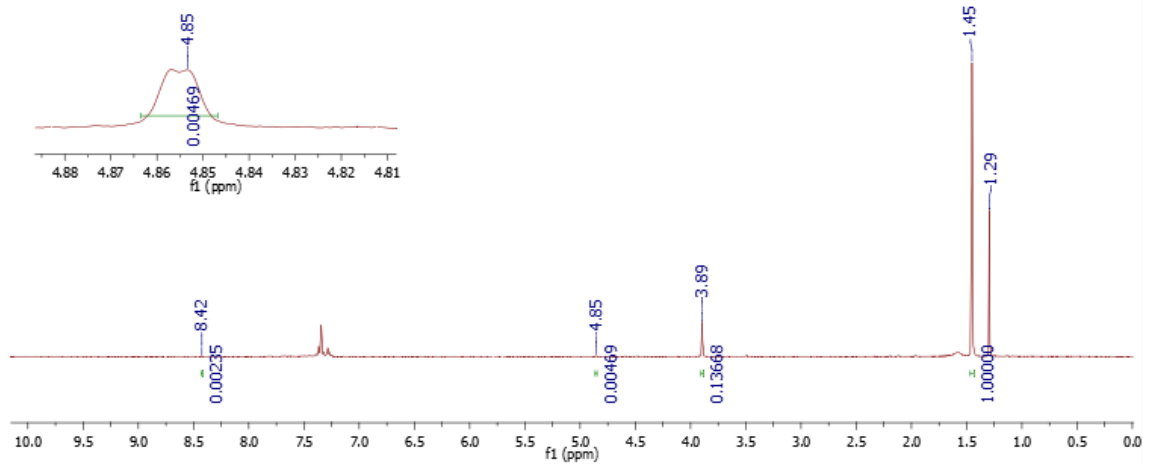

Figure 55 Entry 3

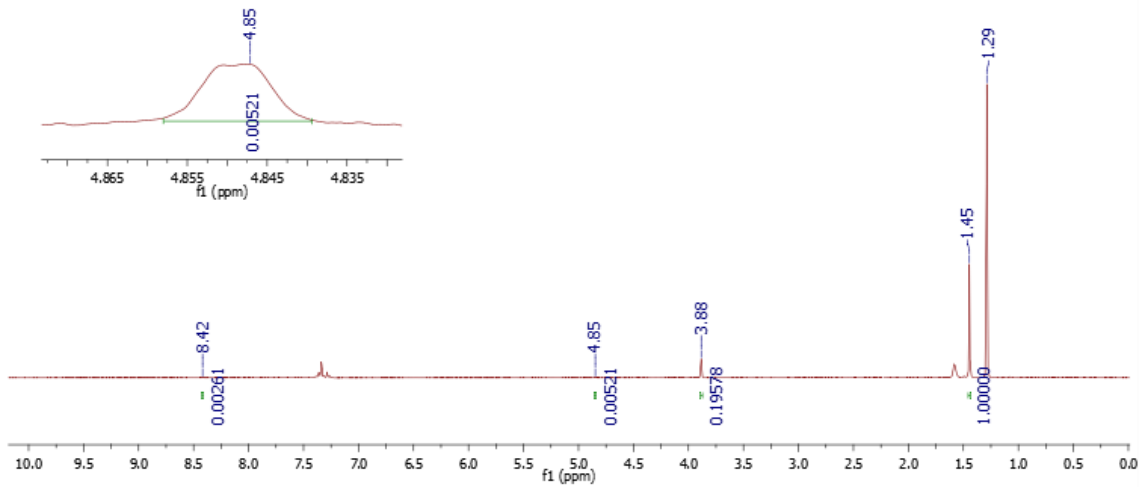

Figure 56 Entry 4

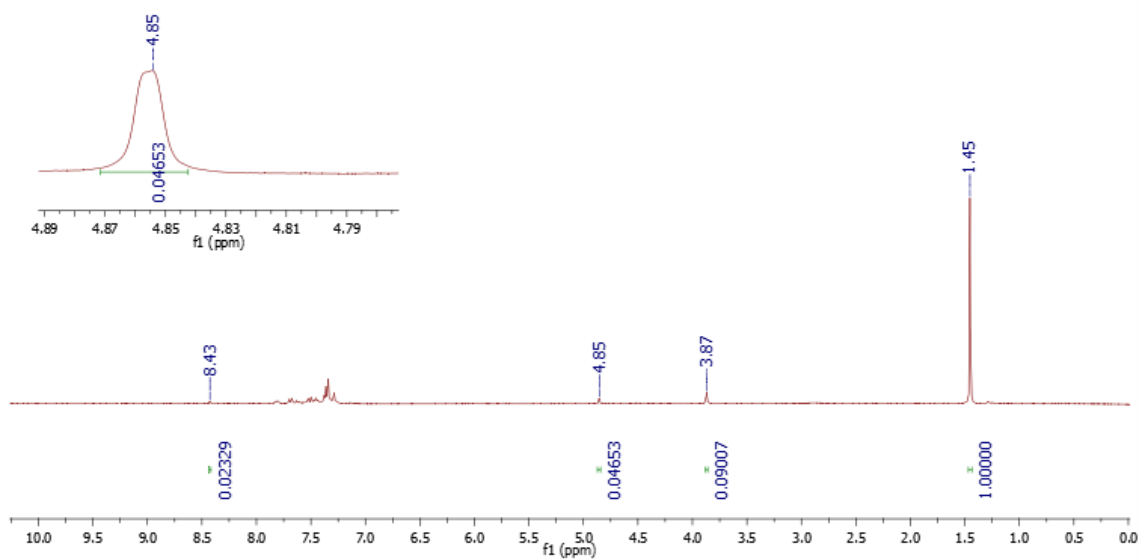

Figure 57 Entry 5

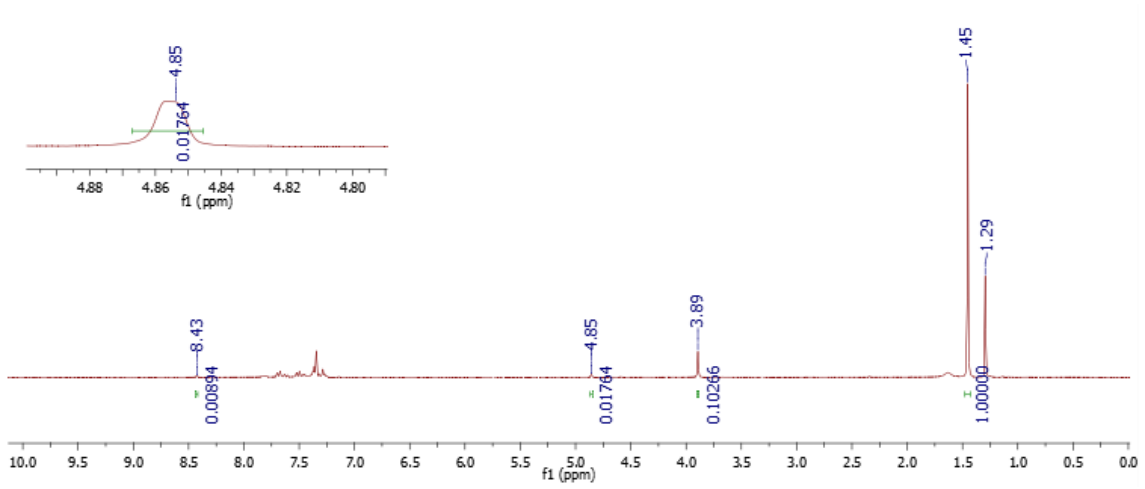

Figure 58 Entry 6

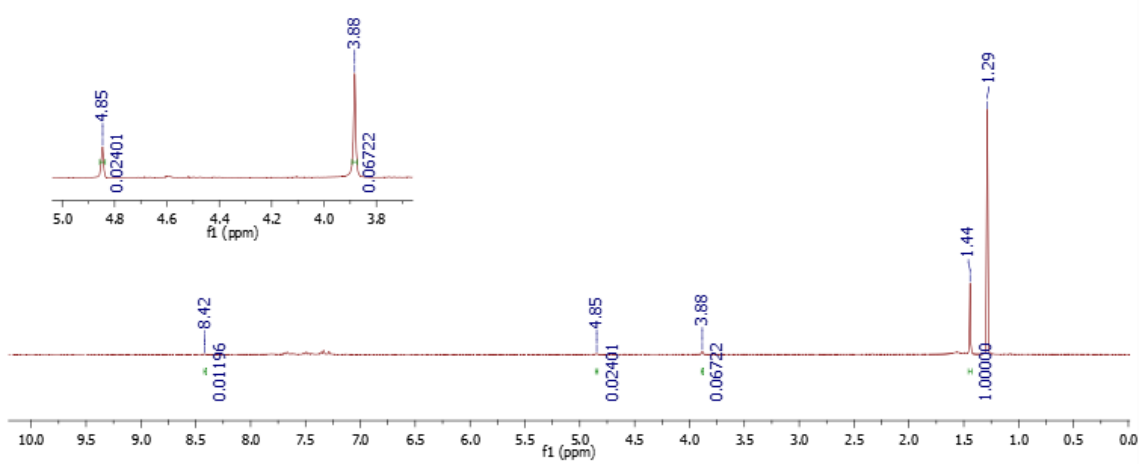

Figure 59 Entry 7

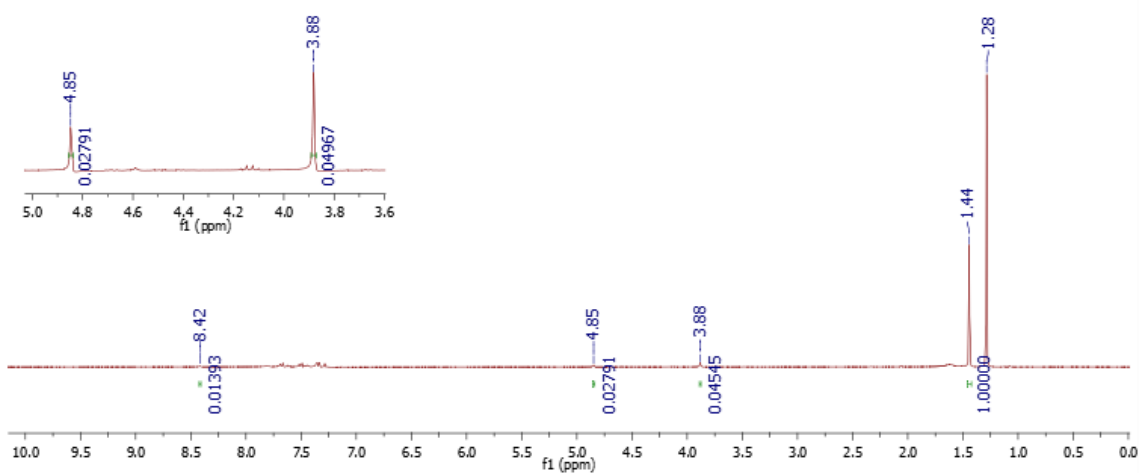

Figure 60 Entry 8

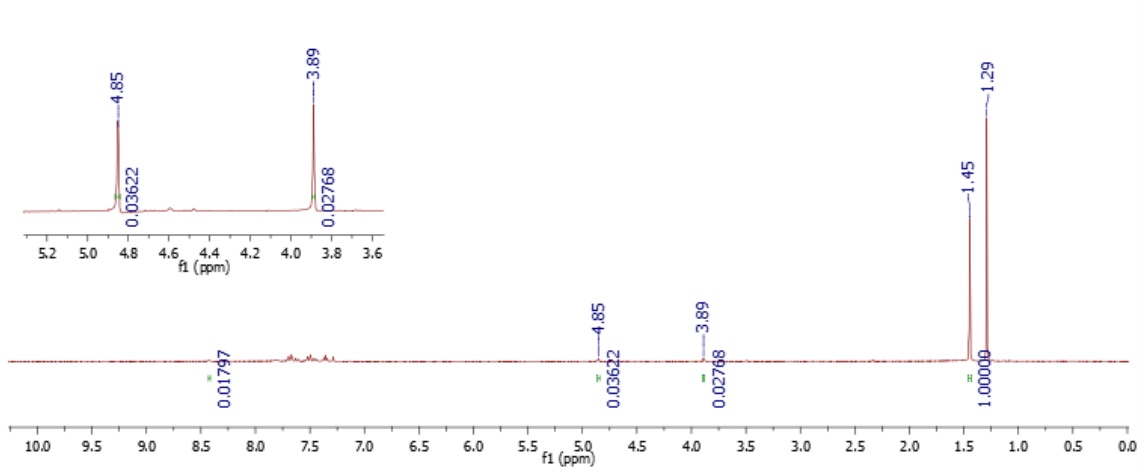

Figure 61 Entry 9

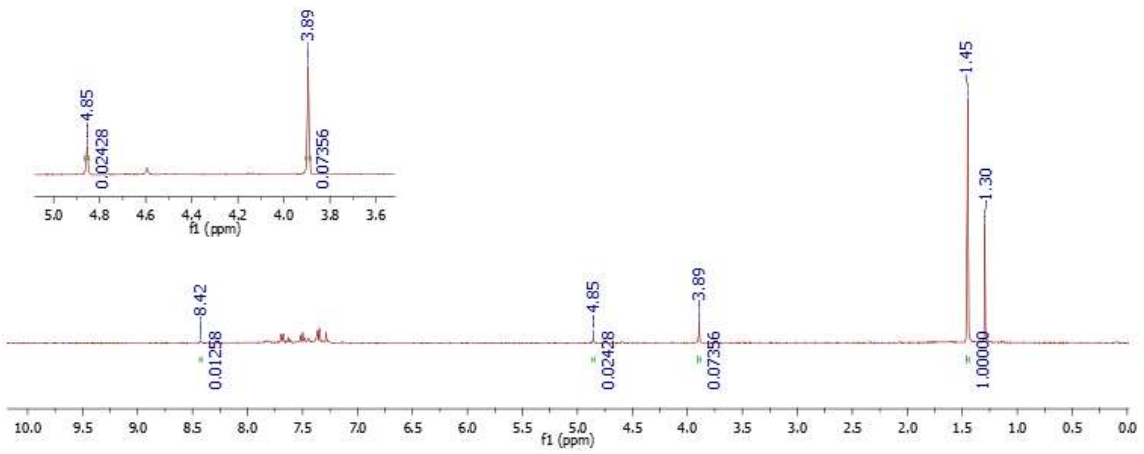

Figure 62 Entry 10

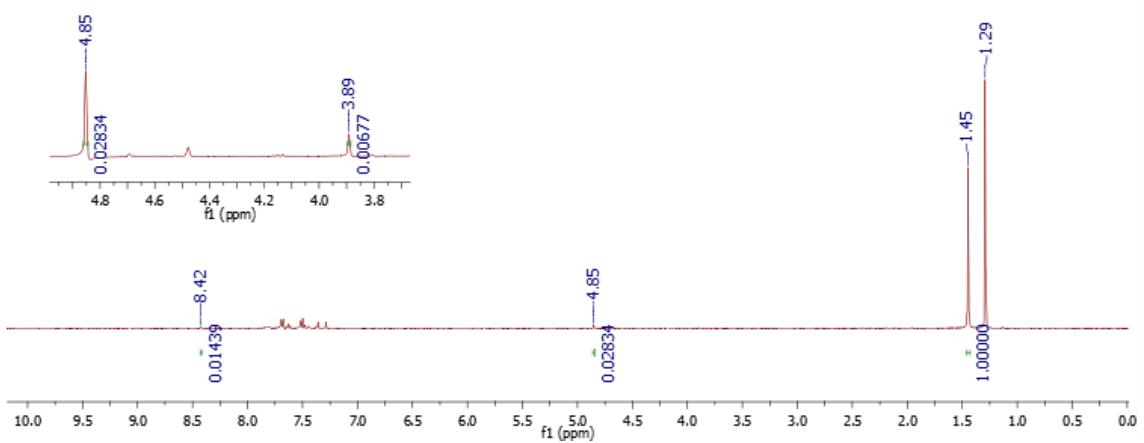

Figure 63 Entry 11



### 3.3. Selected GC-FID analysis of benzylamine oxidation (Table 4)

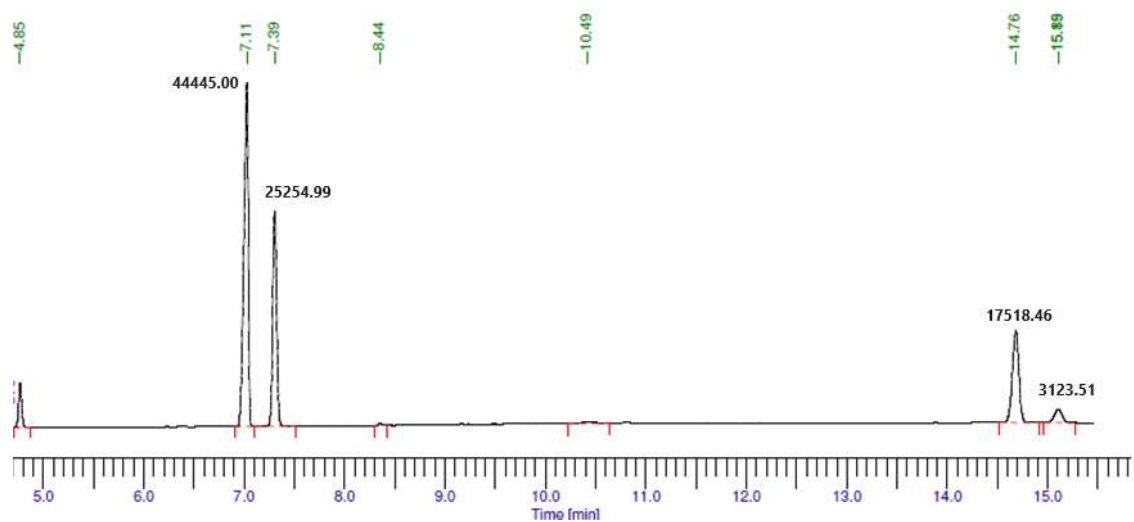

Figure 64 Entry 5 4.85 min.: p-cymene (from catalyst), 7.11 min.: hexadecane (internal standard), 7.39 min.: benzonitrile, 14.76 min.: imine.

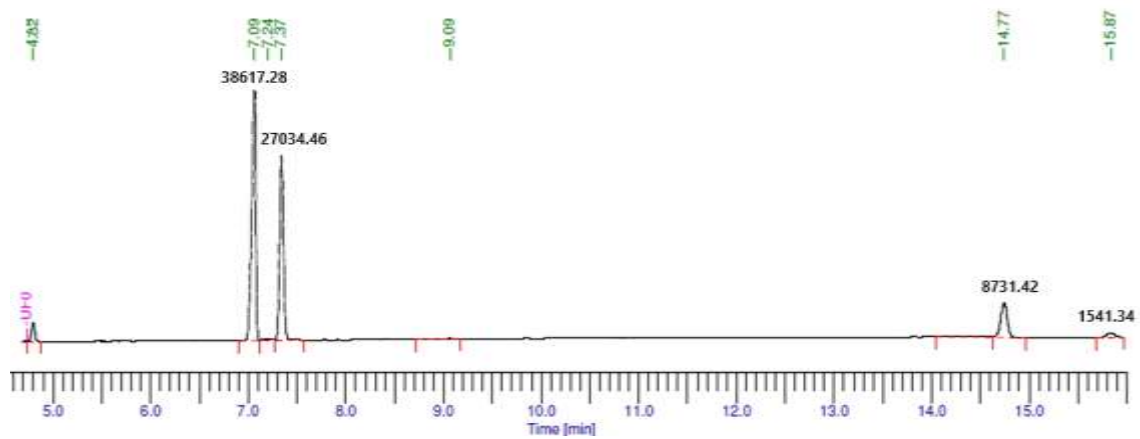

Figure 65 Entry 6 4.82 min.: p-cymene (from catalyst), 7.09 min.: hexadecane (internal standard), 7.37 min.: benzonitrile, 14.77 min.: imine.

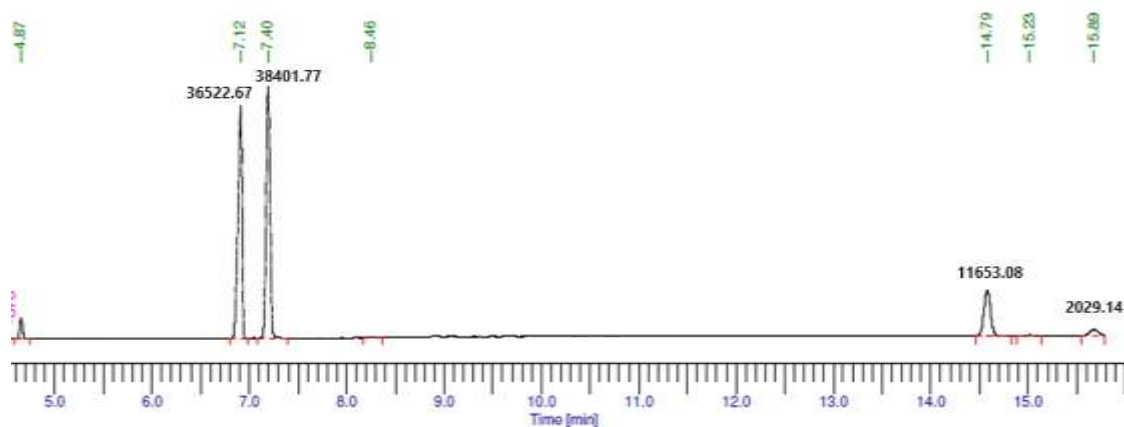

Figure 66 Entry 7 4.87 min.: p-cymene (from catalyst), 7.12 min.: hexadecane (internal standard), 7.40 min.: benzonitrile, 14.79 min.: imine.

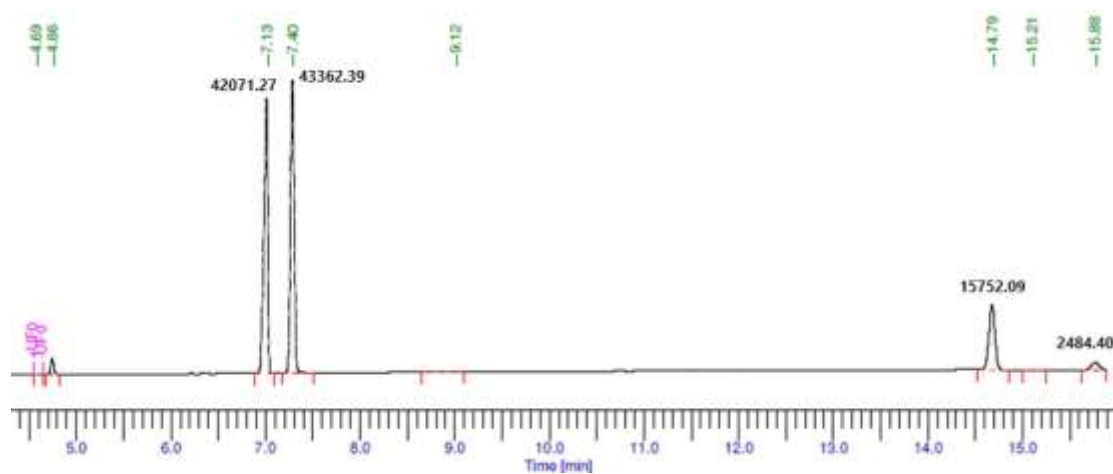

Figure 67 Entry 8 4.86 min.: p-cymene (from catalyst), 7.13 min.: hexadecane (internal standard), 7.40 min.: benzonitrile, 14.79 min.: imine.

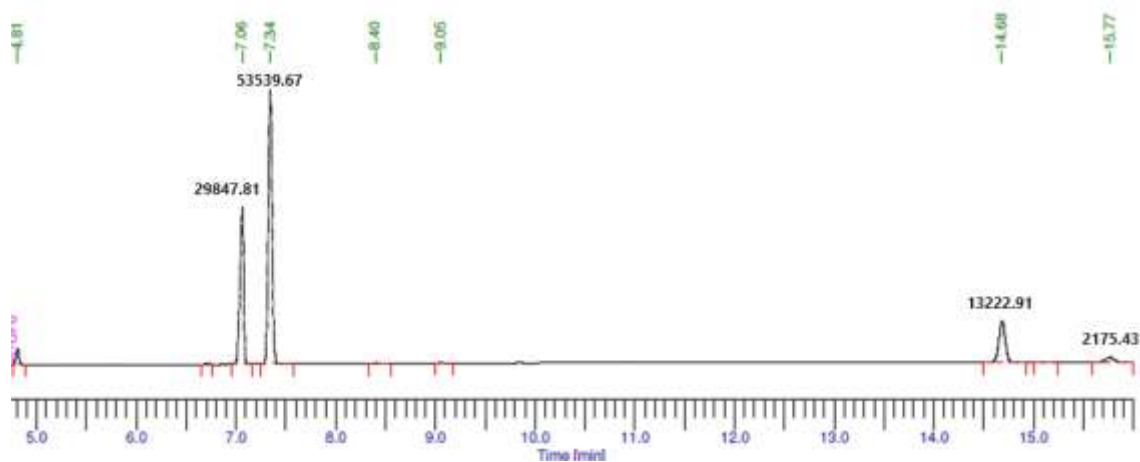

Figure 68 Entry 9 4.81 min.: p-cymene (from catalyst), 7.06 min.: hexadecane (internal standard), 7.34 min.: benzonitrile, 14.68 min.: imine.

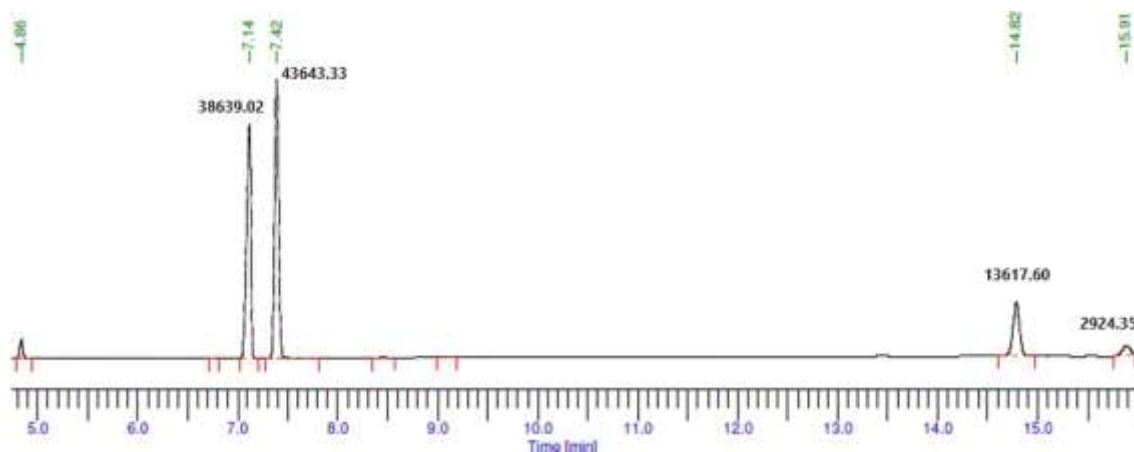

Figure 69 Entry 10 4.86 min.: p-cymene (from catalyst), 7.14 min.: hexadecane (internal standard), 7.42 min.: benzonitrile, 14.82 min.: imine.

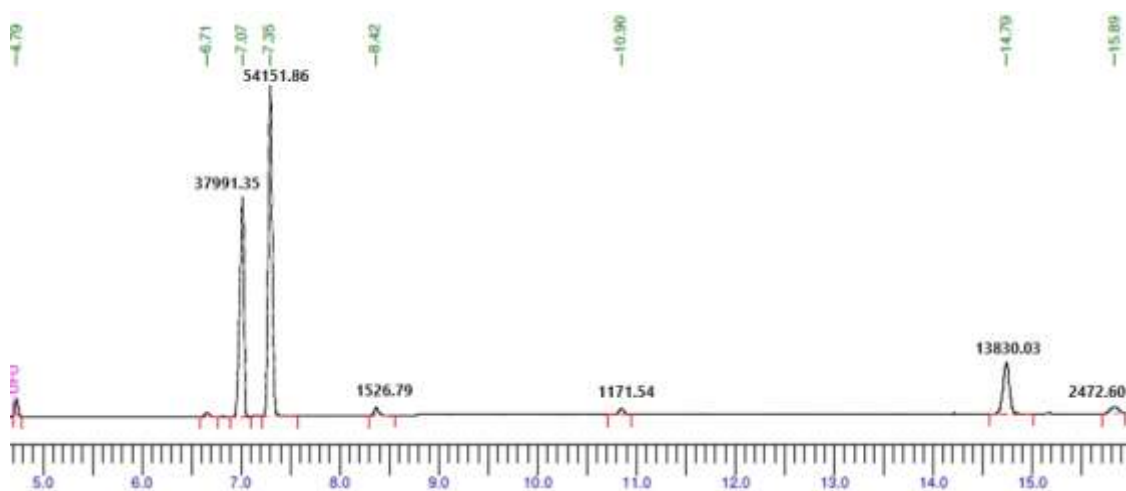

Figure 70 Entry 11 4.79 min.: p-cymene (from catalyst), 7.07 min.: hexadecane (internal standard), 7.35 min.: benzonitrile, 14.79 min.: imine.

### 3.4. Procedure for the oxidation of benzylamines with **Ru-II** $\{[(p\text{-cymene})\text{Ru}(\mu\text{-H})(\mu\text{-Cl})(\mu\text{-HCO}_2)[\text{Ru}(p\text{-cymene})])\text{BF}_4\}$ in sealed vessel with $\text{N}_2\text{O}$

A 50 mL high vacuum tube was equipped with 1 mmol of benzylamines, 2 mL of tert-butanol and, 6.4 mg (0.01 mmol) of **Ru-II**  $\{[(p\text{-cymene})\text{Ru}(\mu\text{-H})(\mu\text{-Cl})(\mu\text{-HCO}_2)[\text{Ru}(p\text{-cymene})])\text{BF}_4\}$ . 100 mL of  $\text{N}_2\text{O}$  was condensed into to the tube at  $-196^\circ\text{C}$ . The mixture was stirred for 12 hours at  $95^\circ\text{C}$ . After reaction time, the mixture was transferred to a round-bottom flask. The reaction products were identified by NMR spectroscopy and gas chromatography-mass spectrometry (GC-MS) and compared with authentic samples or literature data. The product selectivity was determined with GC-FID with hexadecane as internal standard. In addition benzylamine and imine were also quantified by NMR with cyclohexane as an internal standard. Results are summarized in Table 6 of the manuscript.

### 3.5. Selected $^1\text{H-NMR}$ and GC-FID analysis of benzylamine oxidation (Table 6)

#### Entry 1 2,4-dimethoxybenzylamine

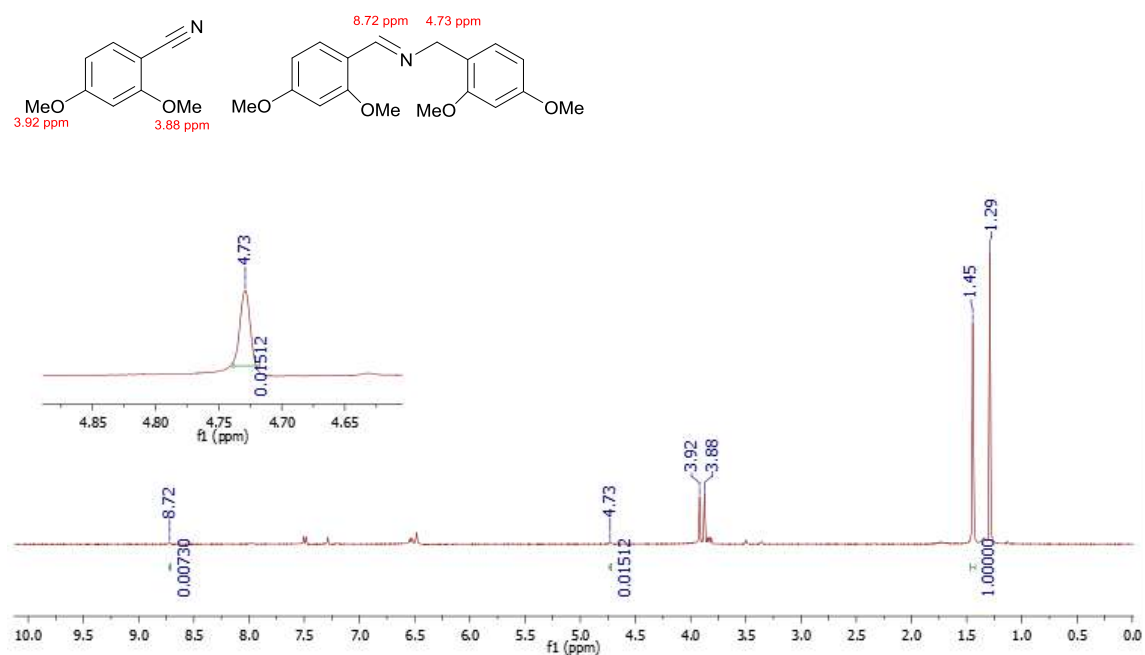

Figure 71 Entry 1 2,4-dimethoxybenzylamine NMR

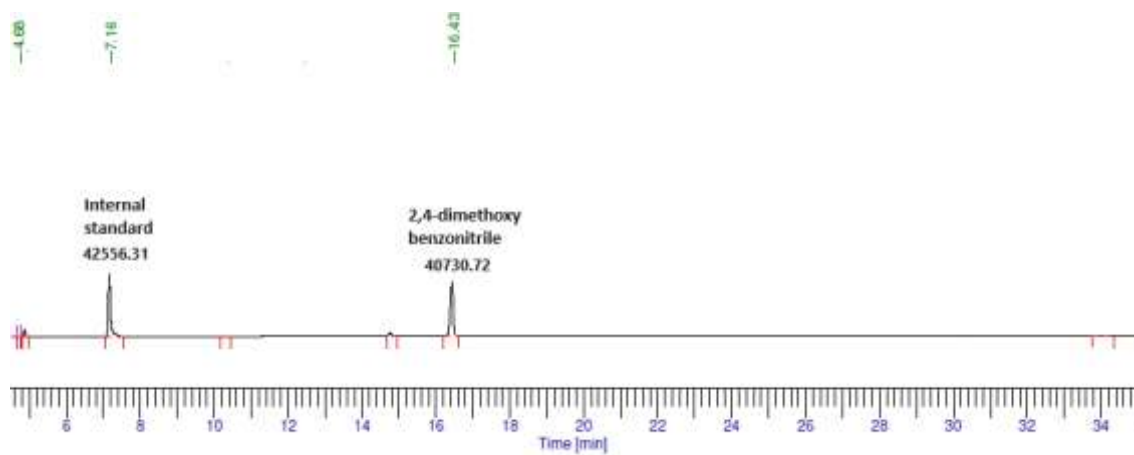

Figure 72 Entry 1 2,4-dimethoxybenzylamine GC-FID

Entry 2 4-methoxybenzylamine

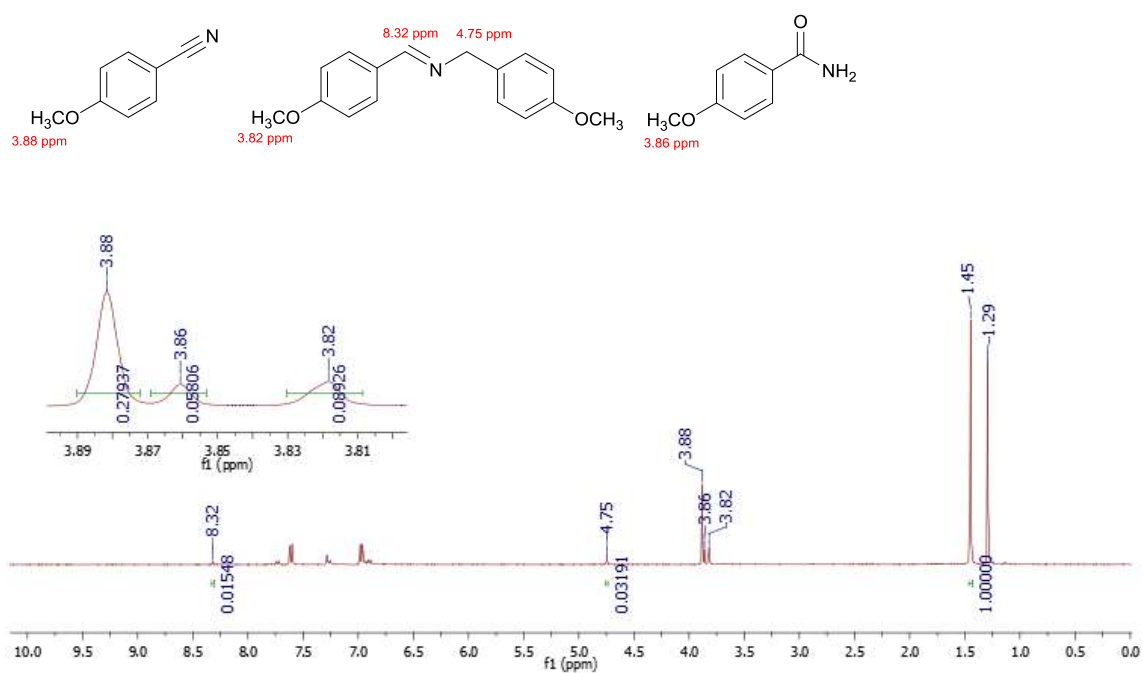

Figure 73 Entry 2 4-methoxybenzylamine NMR

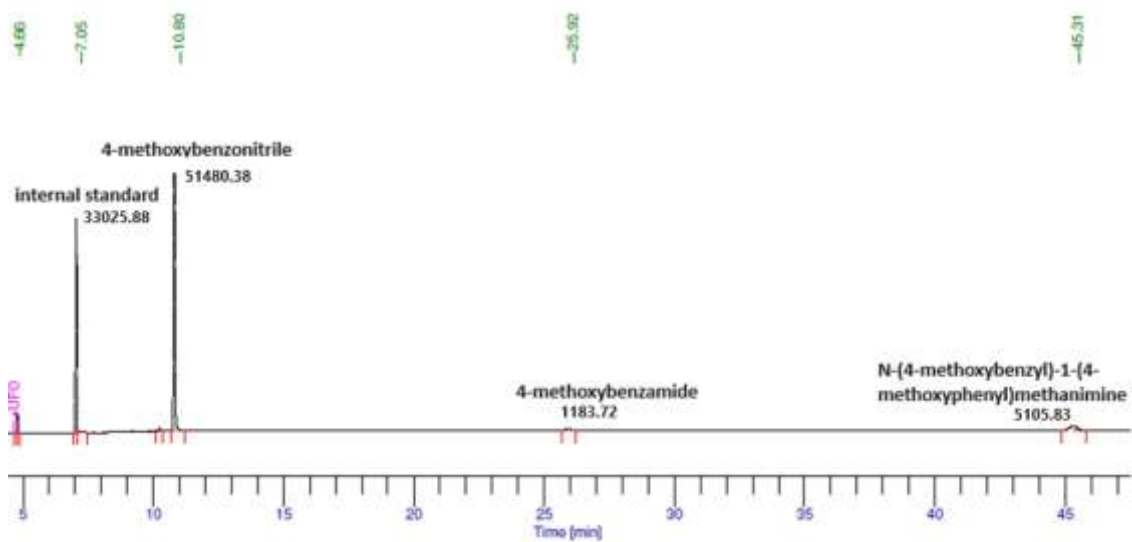

Figure 74 Entry 2 4-methoxybenzylamine GC-FID

### Entry 4 4-chlorobenzylamine

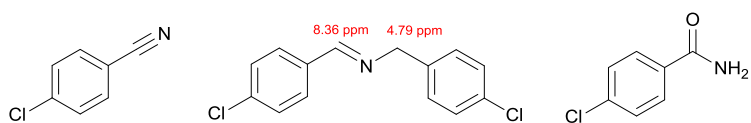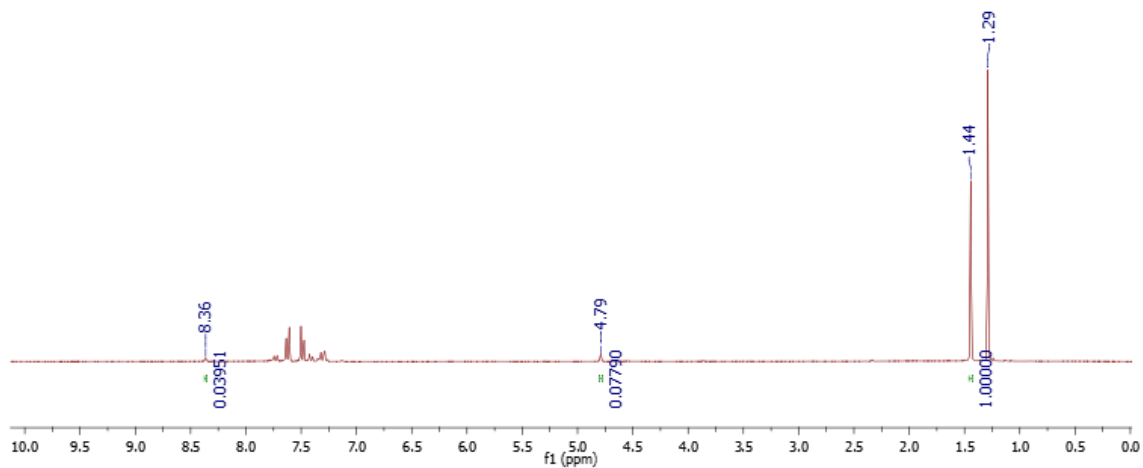

Figure 75 Entry 4 4-chlorobenzylamine NMR

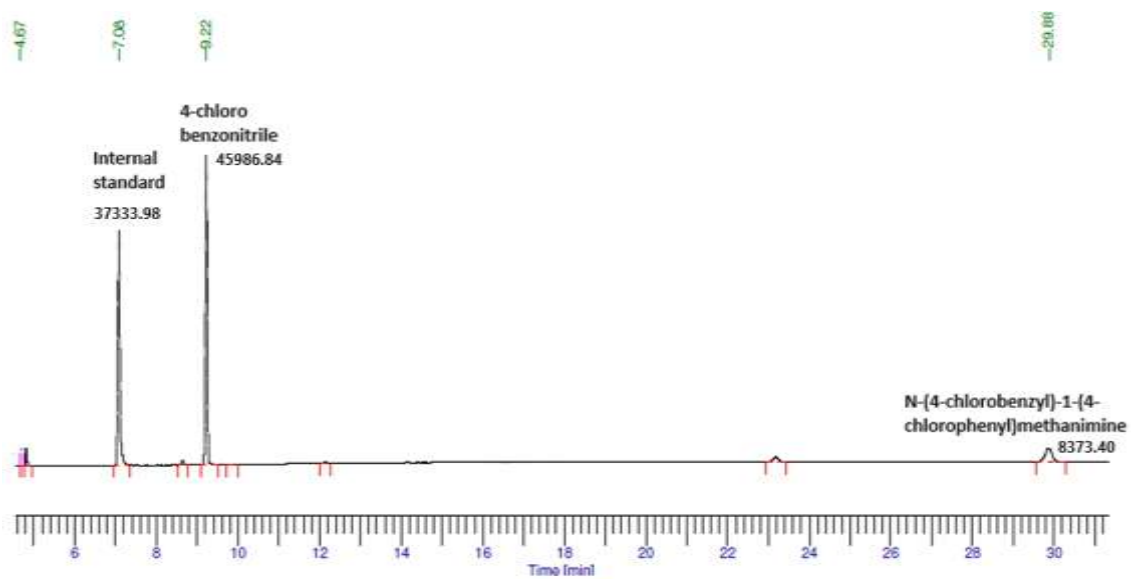

Figure 76 Entry 4 4-chlorobenzylamine GC-FID

Entry 5 4-tertbutylbenzylamine

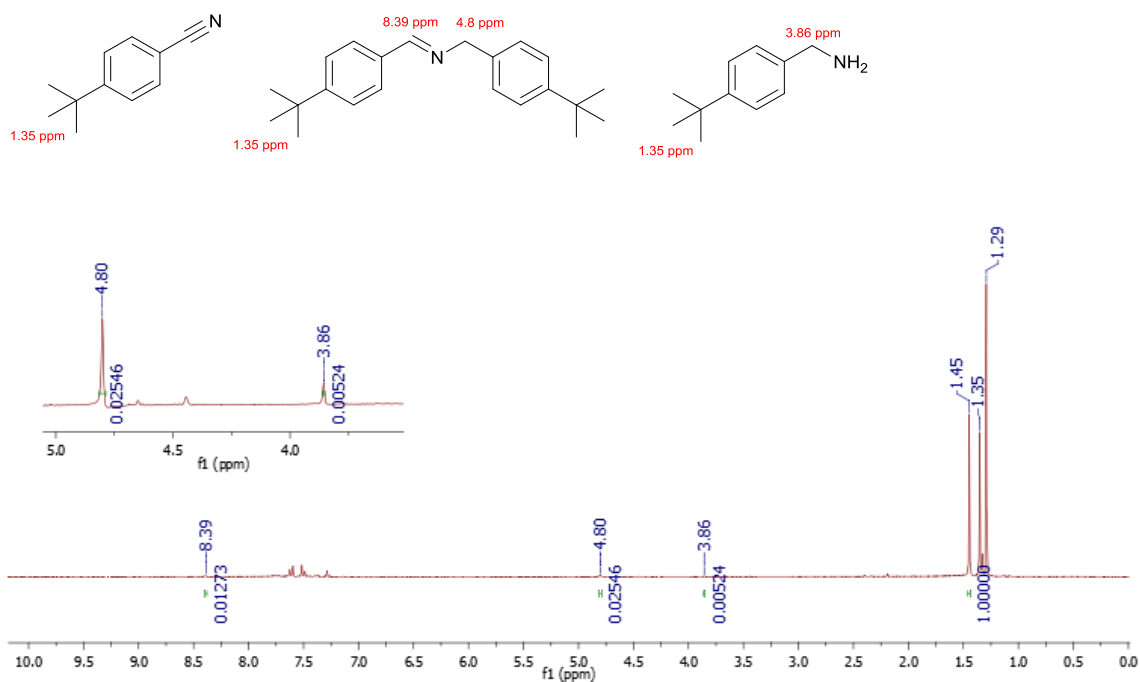

Figure 77 Entry 5 4-tertbutylbenzylamine NMR

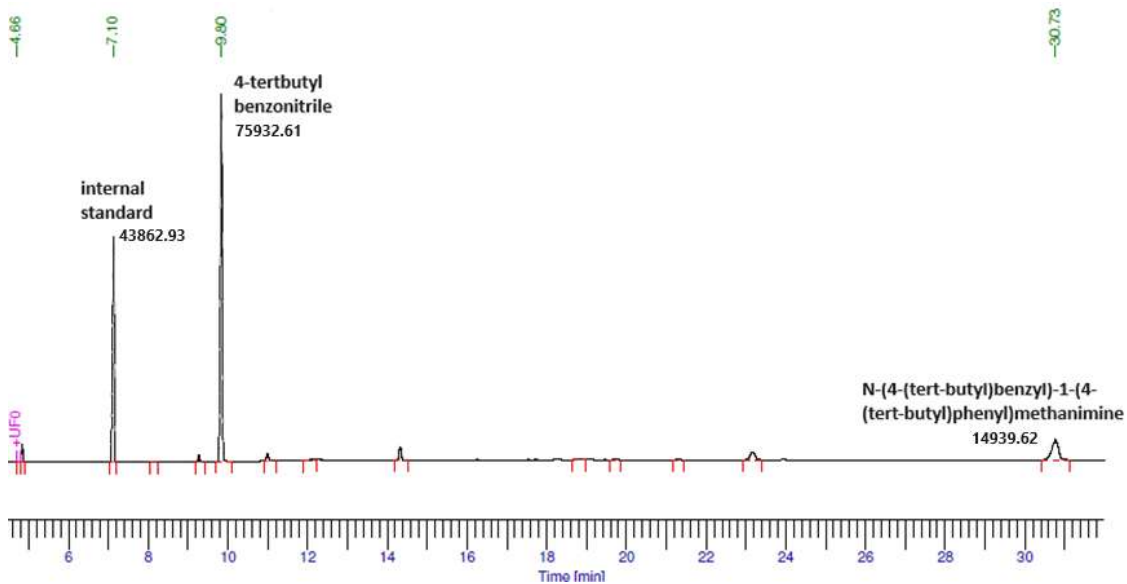

Figure 78 Entry 5 4-tertbutylbenzylamine GC-FID



Entry 6 refer Table 4 of the manuscript

Entry 7 3-bromobenzylamine

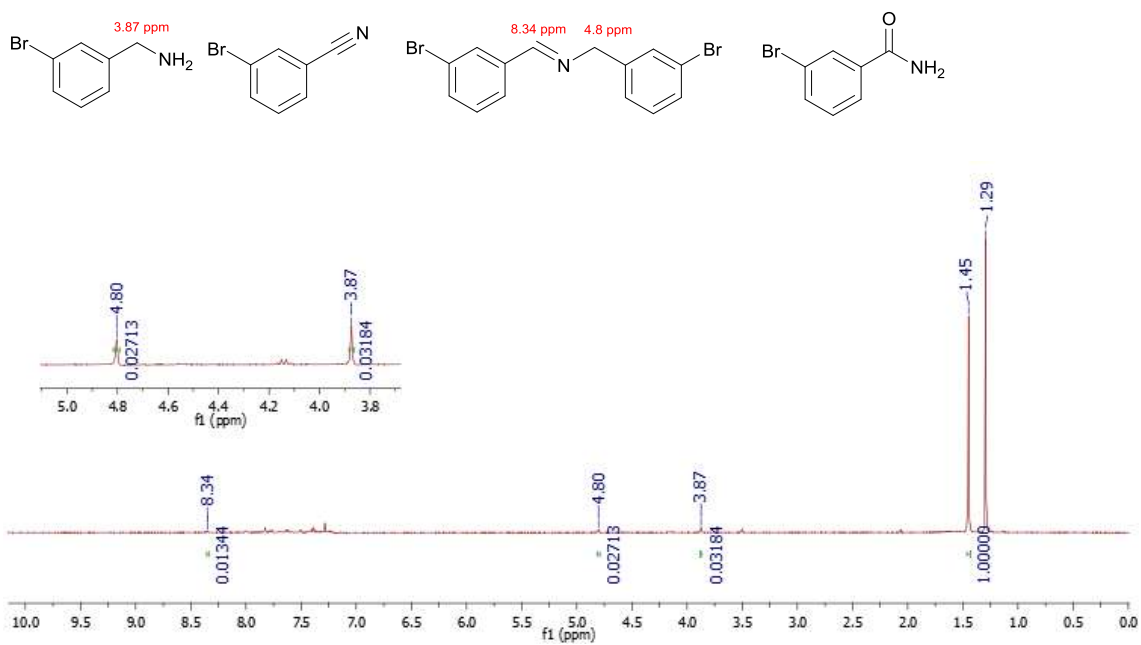

Figure 79 Entry 7 3-bromobenzylamine NMR

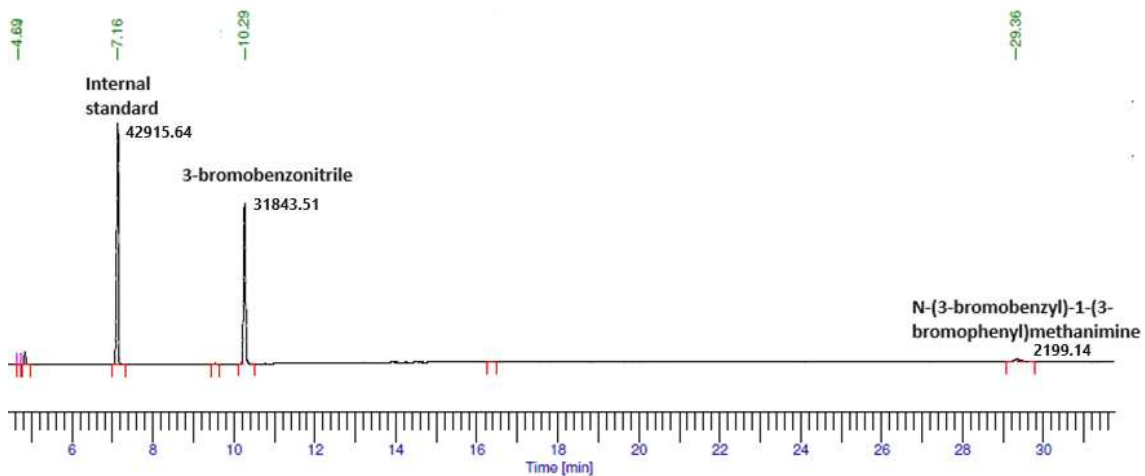

Figure 80 Entry 7 3-bromobenzylamine GC-FID

#### 4. Oxidation of benzyl alcohols

##### 4.1. Optimisation of benzyl alcohol oxidation with ruthenium complex **Ru-II** $\{[(p\text{-cymene})\text{Ru}](\mu\text{-H})(\mu\text{-Cl})(\mu\text{-HCO}_2)[\text{Ru}(p\text{-cymene})]\}\text{BF}_4$

A 20 mL screw-cap vial was equipped with stirring bar, 52  $\mu\text{L}$  (0.5 mmol) of benzyl alcohol, 1 mL of solvent, and 6.4 mg (0.01 mmol) of **Ru-II**. The mixture was stirred under  $\text{O}_2$  or  $\text{N}_2\text{O}$  atmosphere (balloon), as specified in Table 2, which outlines the precise conditions for the catalyst, solvent, oxidant, temperature, and reaction time. Products were analysed by NMR, GC and GC-MS and compared with authentic samples or literature data. Reactions with water as solvent were extracted (3x1.5mL) with DCM followed by microfiltration through a Pasteur pipette with glass wool and  $\text{MgSO}_4$ . To 0.9mL of this solution hexadecane as internal was added for GC and GC-MS analysis. For NMR analysis DCM was carefully evaporated, internal standard and  $\text{CDCl}_3$  added. Conversions were quantified using either GC with hexadecane as internal standard or NMR techniques with cyclohexane as internal standard.

**Table 2.** Optimisation of benzyl alcohol oxidation to benzaldehyde.

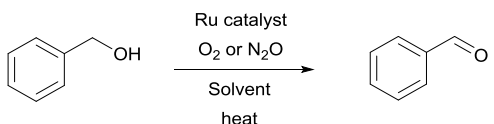

| Entry                 | Cat. [mol%] | Solvent              | Oxidant      | T [°C] | t [h] | Conv. [%] | CHO Selectivity [%] |
|-----------------------|-------------|----------------------|--------------|--------|-------|-----------|---------------------|
| <b>1</b>              | 2           | <i>t</i> -BuOH       | $\text{O}_2$ | 65     | 20    | 6         | 100                 |
| <b>2</b>              | 2           | $\text{H}_2\text{O}$ | $\text{O}_2$ | 65     | 20    | 14        | 32                  |
| <b>3</b>              | 2           | $\text{H}_2\text{O}$ | $\text{O}_2$ | 95     | 20    | 45        | 39                  |
| <b>4</b>              | 2           | $\text{H}_2\text{O}$ | $\text{O}_2$ | 95     | 48    | 100       | 50                  |
| <b>5</b>              | 4           | $\text{H}_2\text{O}$ | $\text{O}_2$ | 95     | 20    | 14        | 100                 |
| <b>6</b>              | 4           | toluene              | $\text{O}_2$ | 65     | 48    | 18        | 100                 |
| <b>7</b>              | 2           | toluene              | $\text{O}_2$ | 95     | 20    | 45        | 100                 |
| <b>8</b>              | 2           | toluene              | $\text{O}_2$ | 80     | 48    | 31        | 95                  |
| <b>9<sup>b</sup></b>  | 2           | toluene              | $\text{O}_2$ | 95     | 5     | 59        | 100                 |
| <b>10<sup>b</sup></b> | 2           | toluene              | $\text{O}_2$ | 95     | 16    | 100       | 96                  |

<sup>b)</sup> Reactions performed in a 50 mL tube with a high vacuum teflon valve with 4.5 mmol  $\text{O}_2$  condensed into the tube at  $-196^\circ\text{C}$ .

#### 4.2. Procedure for the oxidation of benzyl alcohols with **Ru-II** $\{[(p\text{-cymene})\text{Ru}](\mu\text{-H})(\mu\text{-Cl})(\mu\text{-HCO}_2)[\text{Ru}(p\text{-cymene})])\}\text{BF}_4$

A 50 mL tube with a high vacuum teflon valve was equipped with stirring bar, 0.5 mmol of benzyl alcohol, 1 mL of toluene and 6.4 mg (0.01 mmol) of **Ru-II**  $\{[(p\text{-cymene})\text{Ru}](\mu\text{-H})(\mu\text{-Cl})(\mu\text{-HCO}_2)[\text{Ru}(p\text{-cymene})])\}\text{BF}_4$ . 4.5 mmol of oxygen was condensed into to the tube at -196°C. The mixture was then stirred for 16 hours at 95°C. After reaction time, the mixture was transferred to a round-bottom flask, and 1 mL of methanol was added to help in solubilization and evaporation. The reactions were analyzed using <sup>1</sup>H NMR and GC-MS for product identification and compared to authentic samples or literature data. Reactions with water as solvent were extracted (3x1.5mL) with DCM followed by microfiltration through a Pasteur pipette with glass wool and MgSO<sub>4</sub>. To 0.9mL of this solution hexadecane as internal was added for GC and GC-MS analysis. For NMR analysis DCM was carefully evaporated, internal standard and CDCl<sub>3</sub> added. Conversions were quantified via NMR using cyclohexane as internal standard. Results are summarized in Table 7 of the manuscript.

The following products were exemplarily isolated by column chromatography with silica.

- Benzaldehyde: 46 mg (0.43 mmol), colourless liquid, 86% yield, Rf=0.8 (1:1, EtOAc:hexane).
- 3-Bromobenzaldehyde: 85 mg (0.46 mmol), colourless liquid, 92% yield, Rf=0.8 (1:1, EtOAc:hexane).
- 4-Fluorobenzaldehyde: 59 mg (0.475 mmol), colourless liquid, 95% yield, Rf=0.83 (1:1, EtOAc:hexane).

### 4.3. GC-MS for qualitative analysis of benzyl alcohols oxidation

#### Entry 1 benzaldehyde

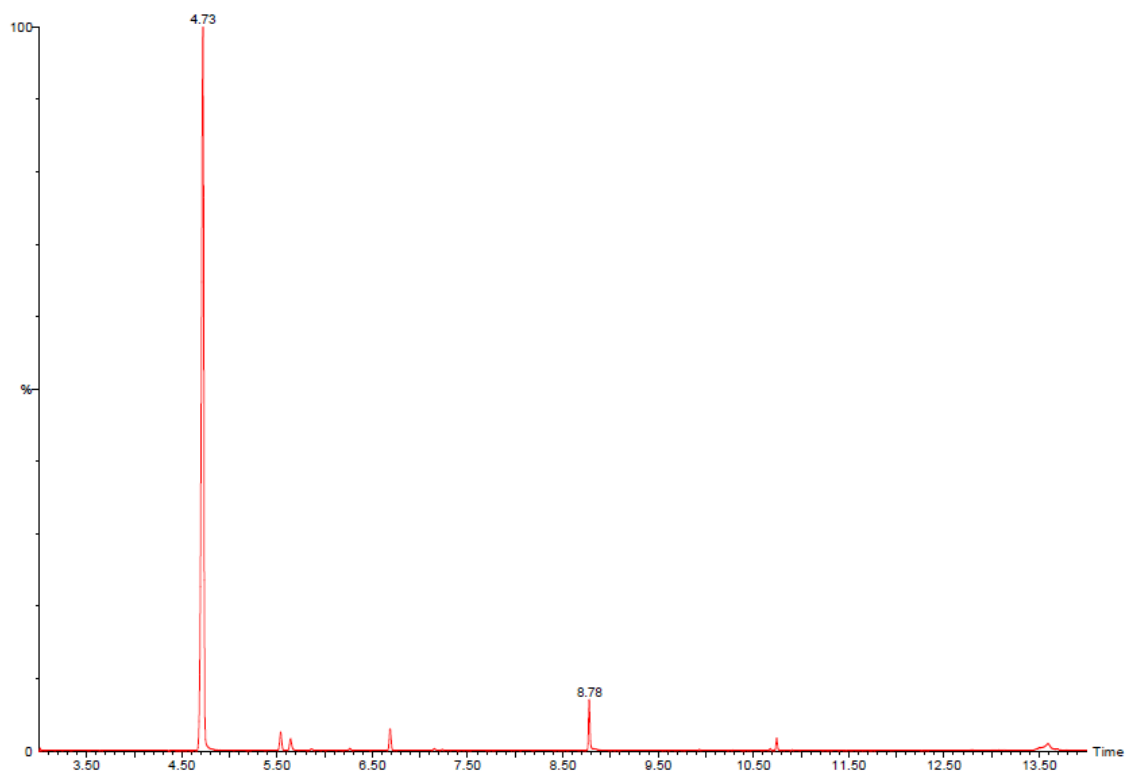

Figure 81 Entry 1, 4.73 min.: benzaldehyde, 8.78 min.: (E)-4-phenylbut-3-en-2-one.(impurity)

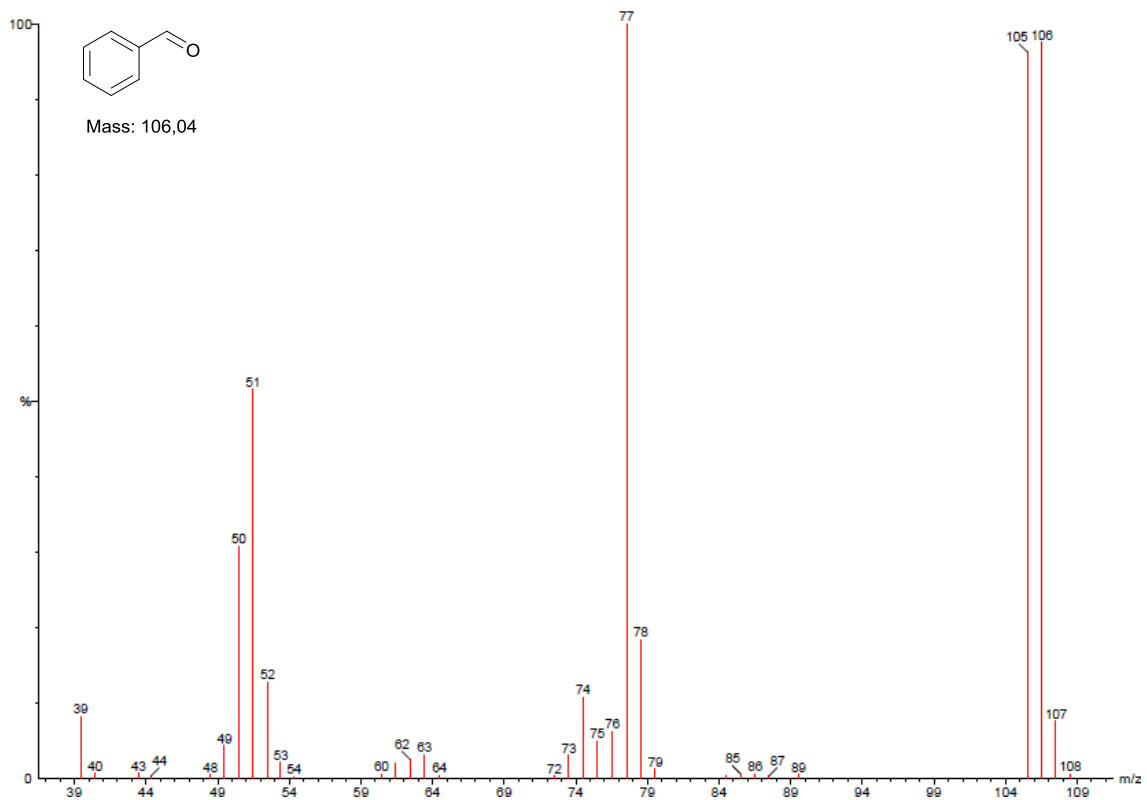

Figure 82 Entry 1, benzaldehyde

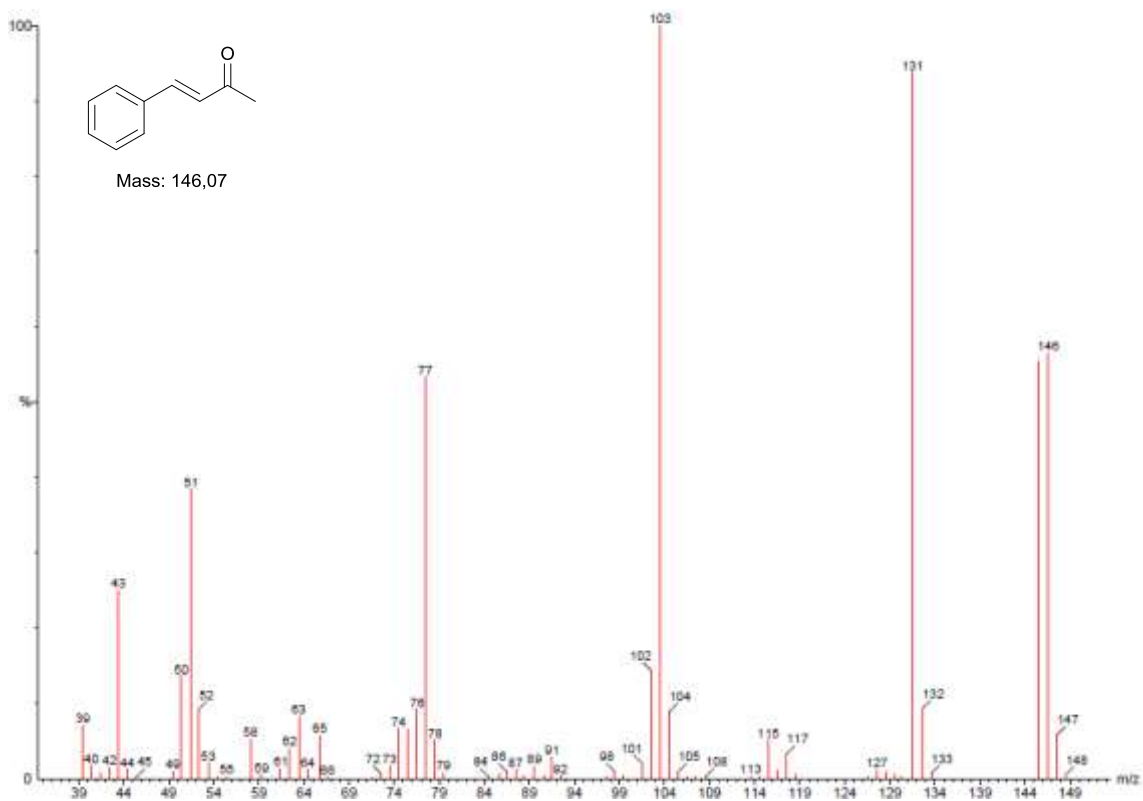

Figure 83. Entry 1, (E)-4-phenylbut-3-en-2-one

### Entry 2 4-bromobenzaldehyde

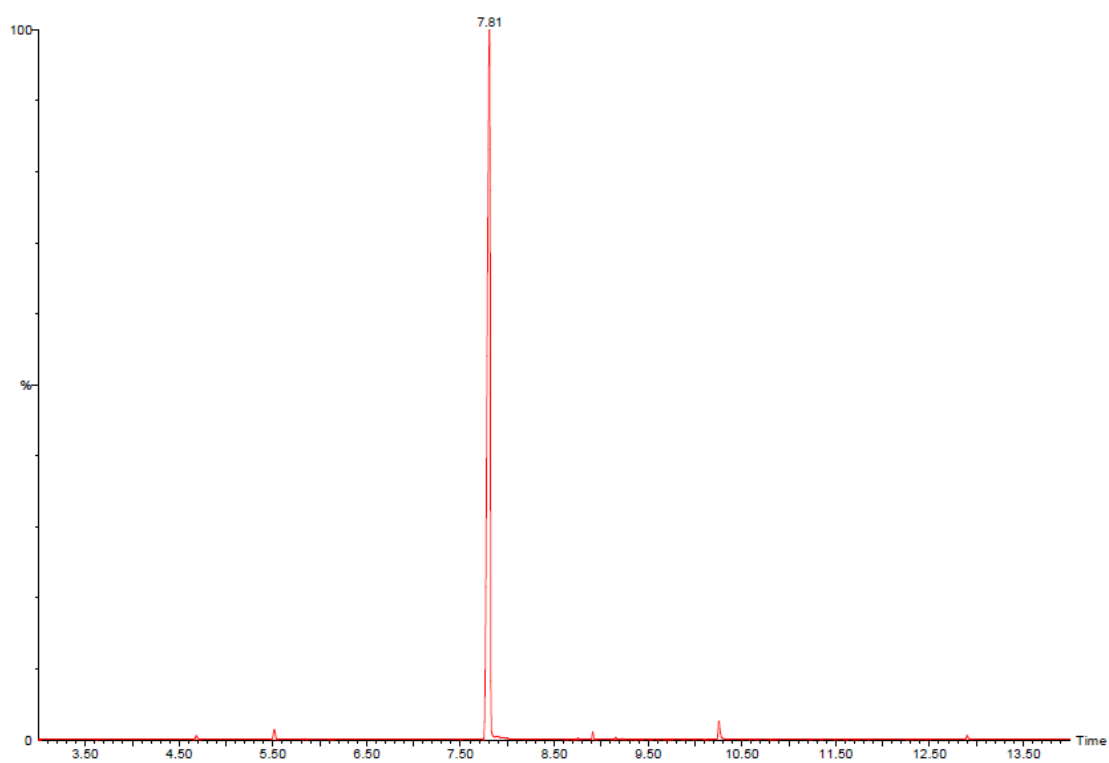

Figure 84 Entry 2, 7.81 min.: 4-bromobenzaldehyde

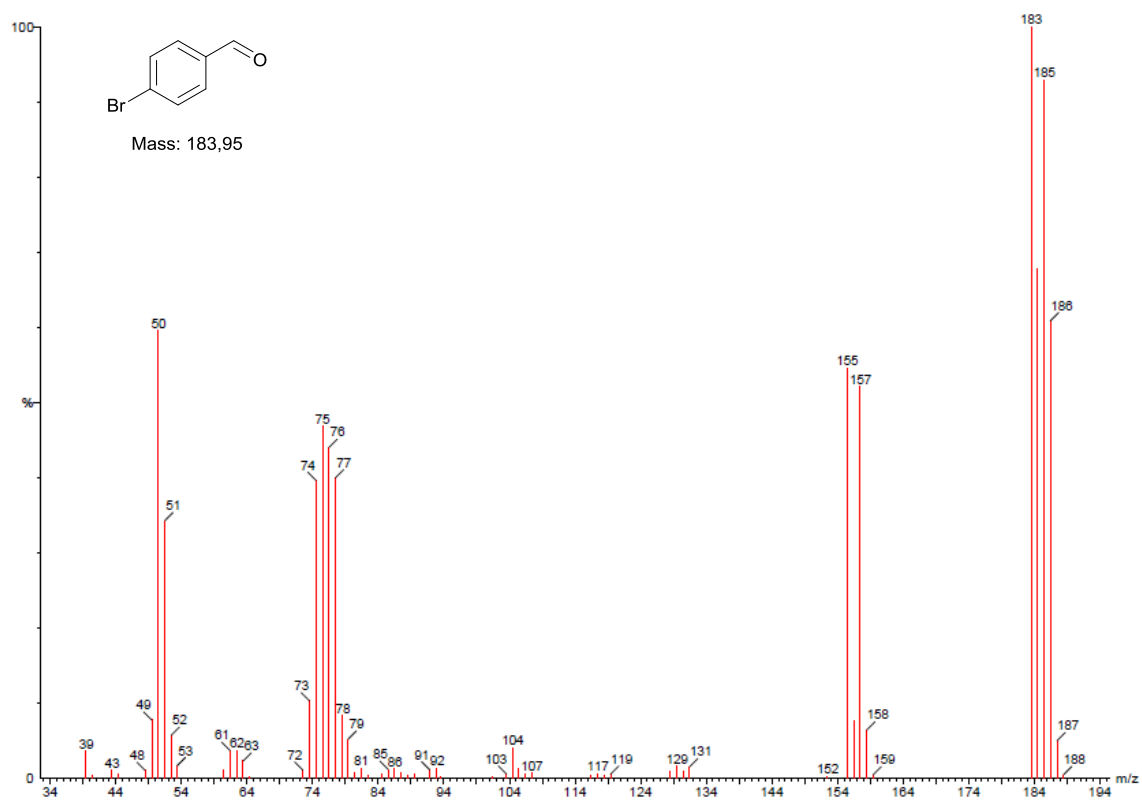

Figure 85 Entry 2, 4-bromobenzaldehyde

### Entry 3 4-fluorobenzyl alcohol

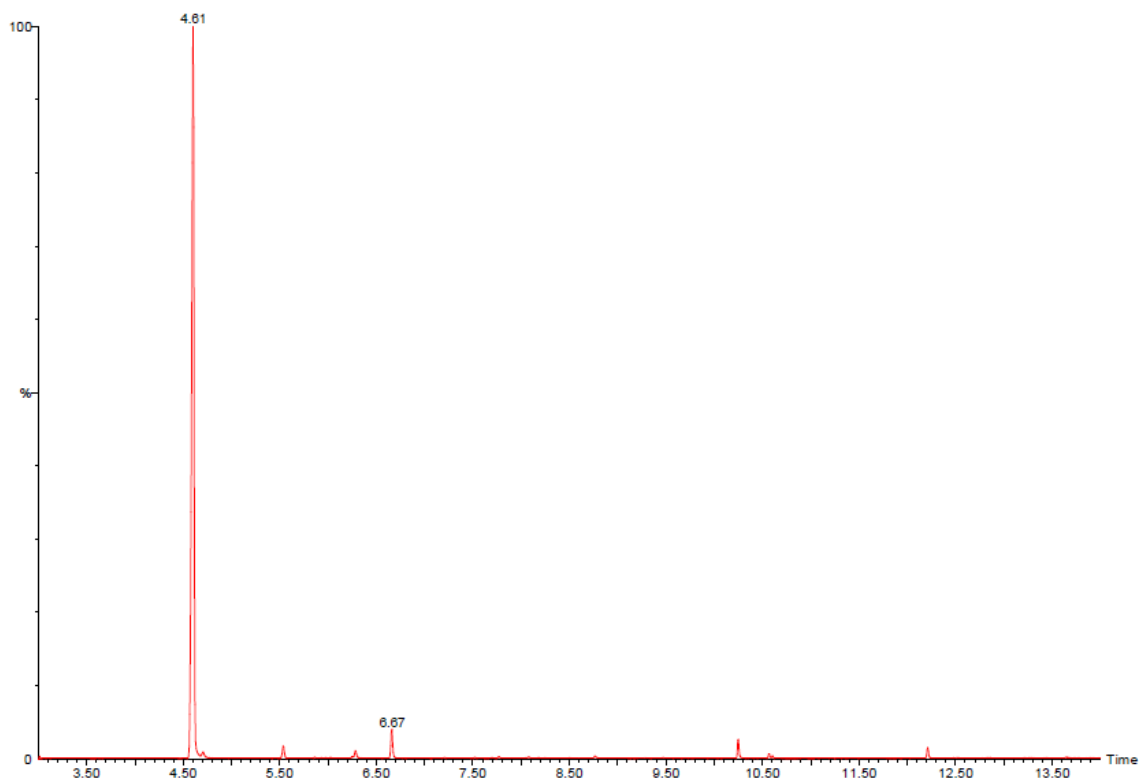

Figure 86 Entry3, 4.61 min.: 4-fluorobenzaldehyde

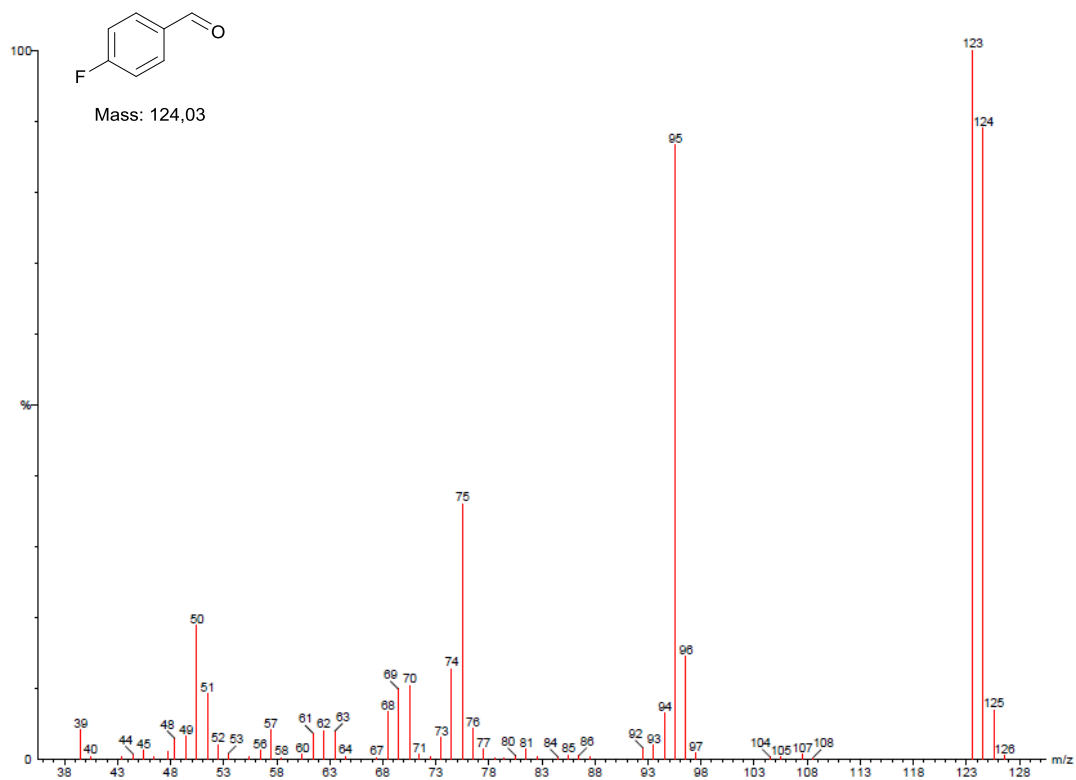

Figure 87 Entry3, 4-fluorobenzaldehyde

#### Entry 4 of 3,5-difluorobenzyl alcohol

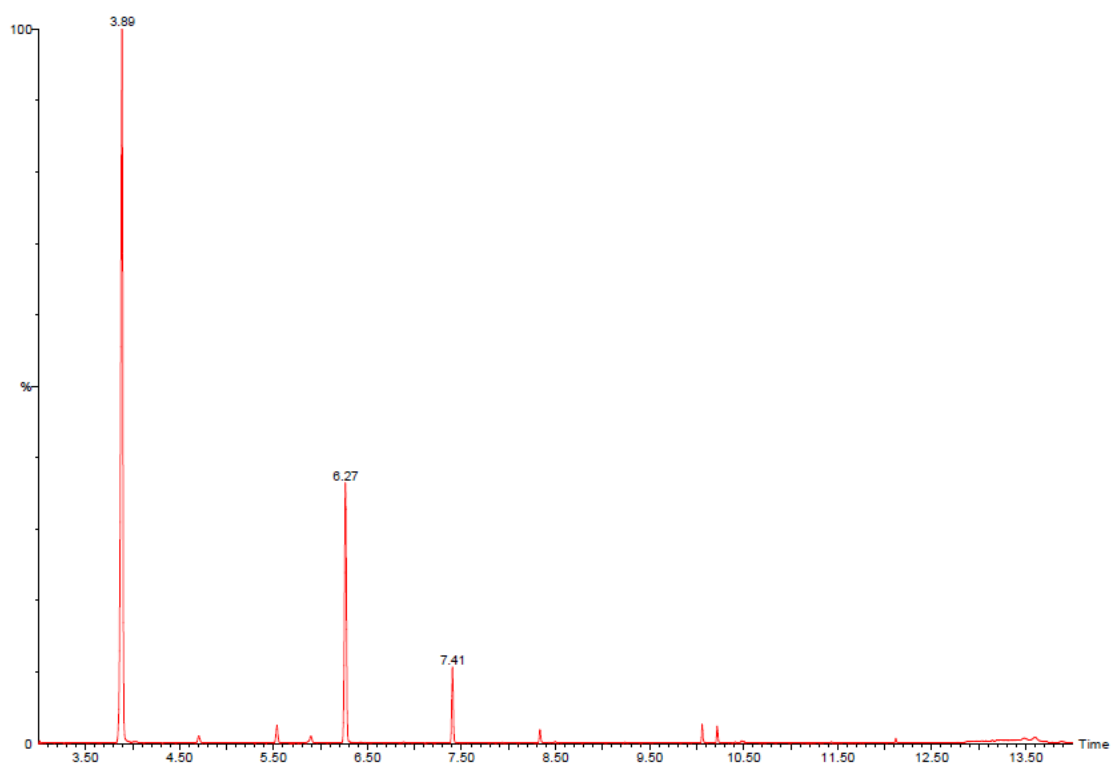

Figure 88 Entry 4, 3.89 min.: 3,5-difluorobenzaldehyde, 6.27 min.: 3,5-difluorobenzyl 3,5-difluorobenzoate, 7.41 min.: 3,5-difluorobenzyl acetate (impurity).

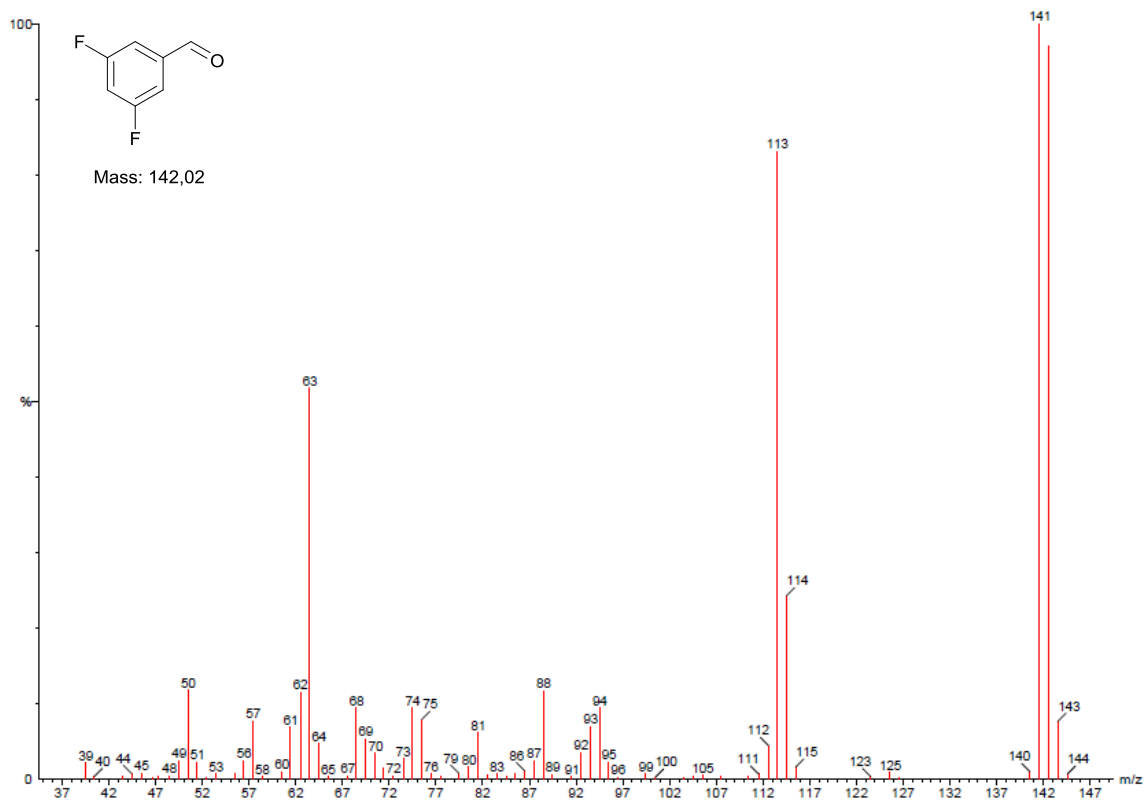

Figure 89 Entry 4, 6.27 min.: 3,5-difluorobenzaldehyde



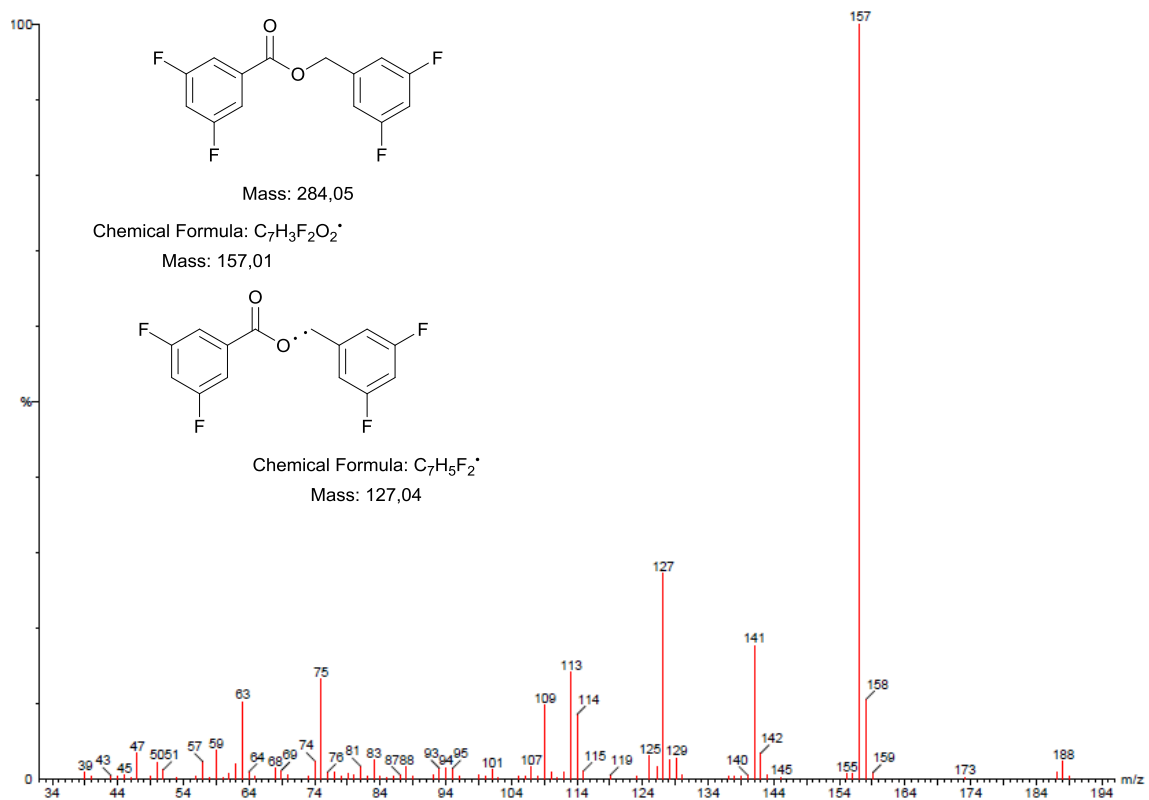

Figure 90 Entry 4, 3,5-difluorobenzyl 3,5-difluorobenzoate

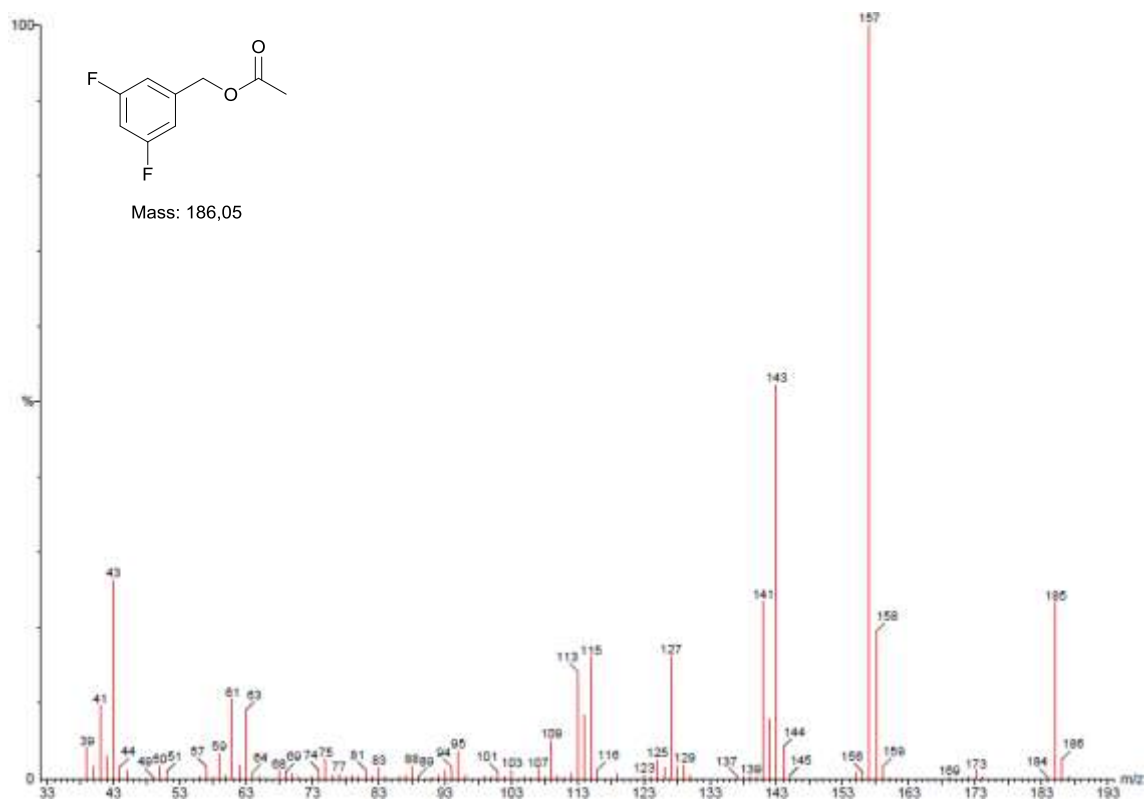

Figure 91. Entry 4, 7.41 min.: 3,5-difluorobenzyl acetate

### Entry 5 4-chlorobenzyl alcohol

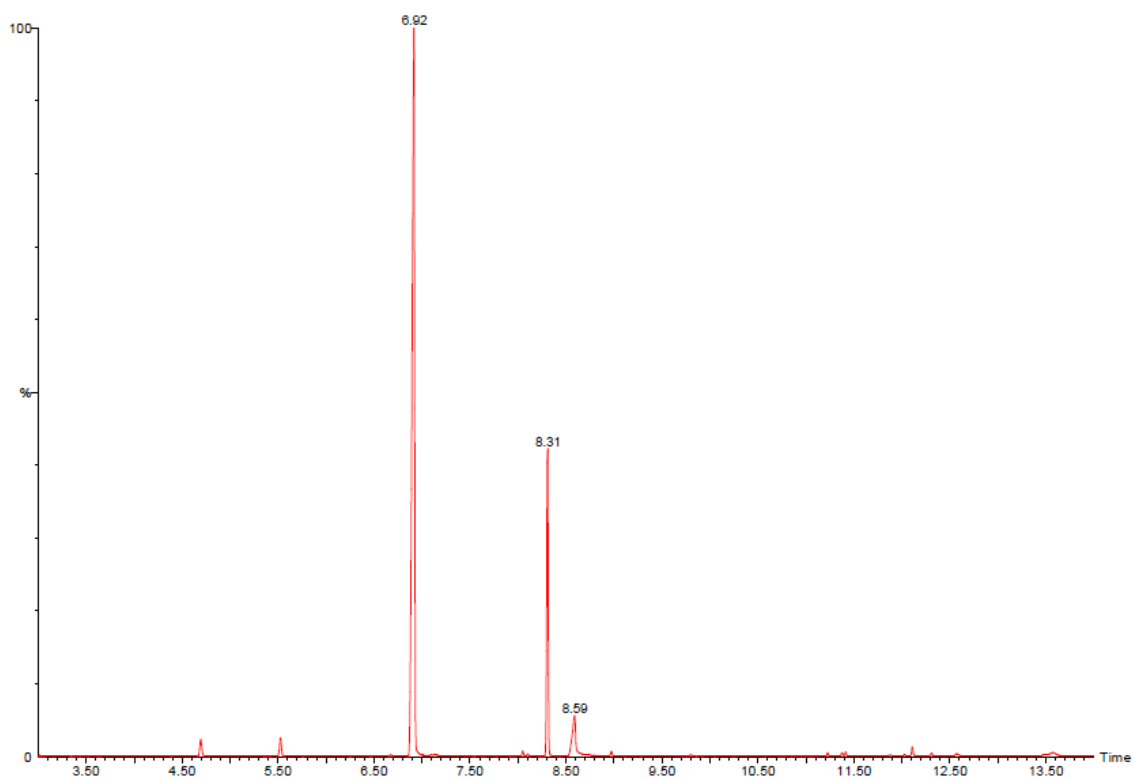

Figure 92 Entry 5, 6.92 min.: 4-chlorobenzaldehyde, 8.31 min.: 4-chlorobenzyl 4-chlorobenzoate

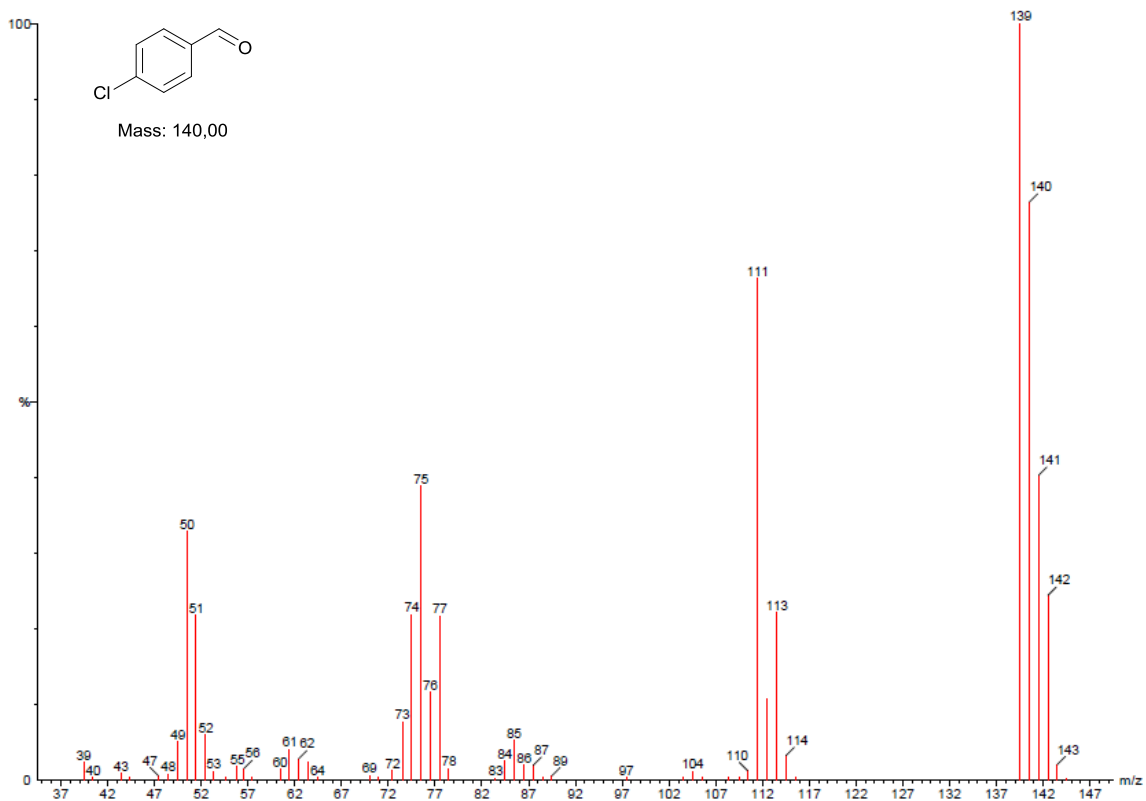

Figure 93 Entry 5 4-chlorobenzaldehyde

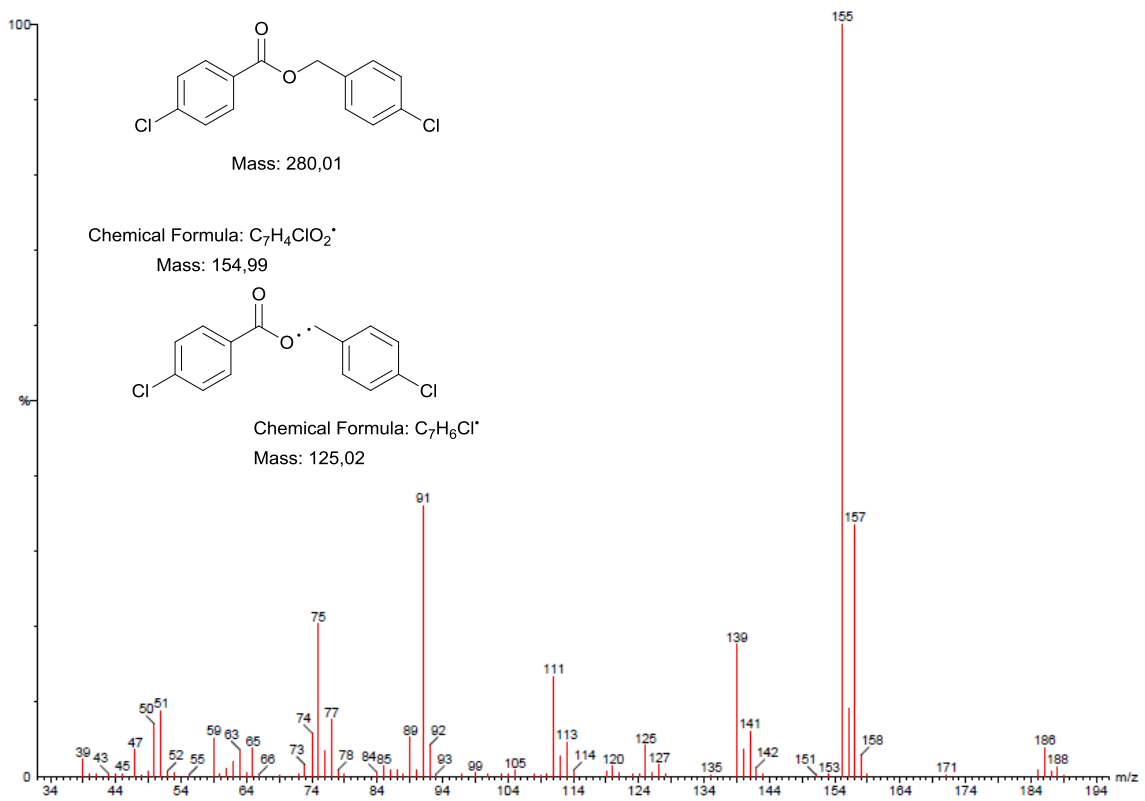

Figure 94 Entry 5 4-chlorobenzyl 4-chlorobenzoate

### Entry 9 2-methoxybenzyl alcohol

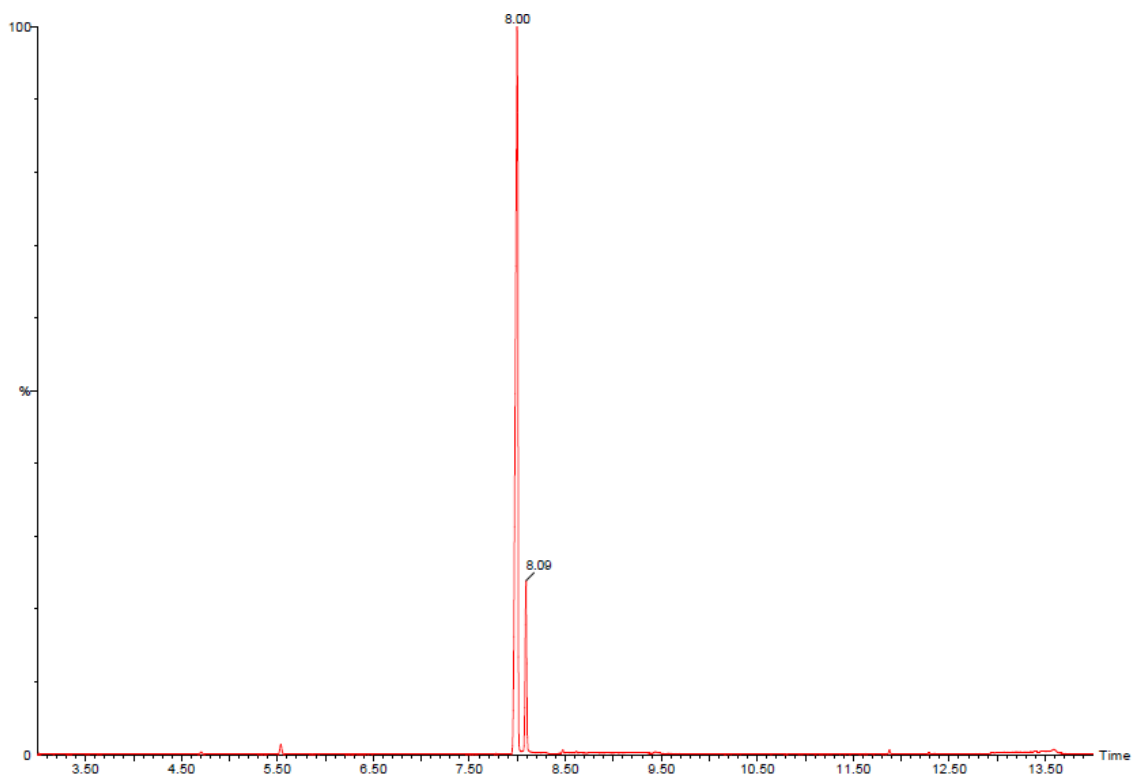

Figure 95 Entry 9 8.00 min.: 2-methoxybenzaldehyde, 8.09 min.: 2-methoxybenzyl alcohol

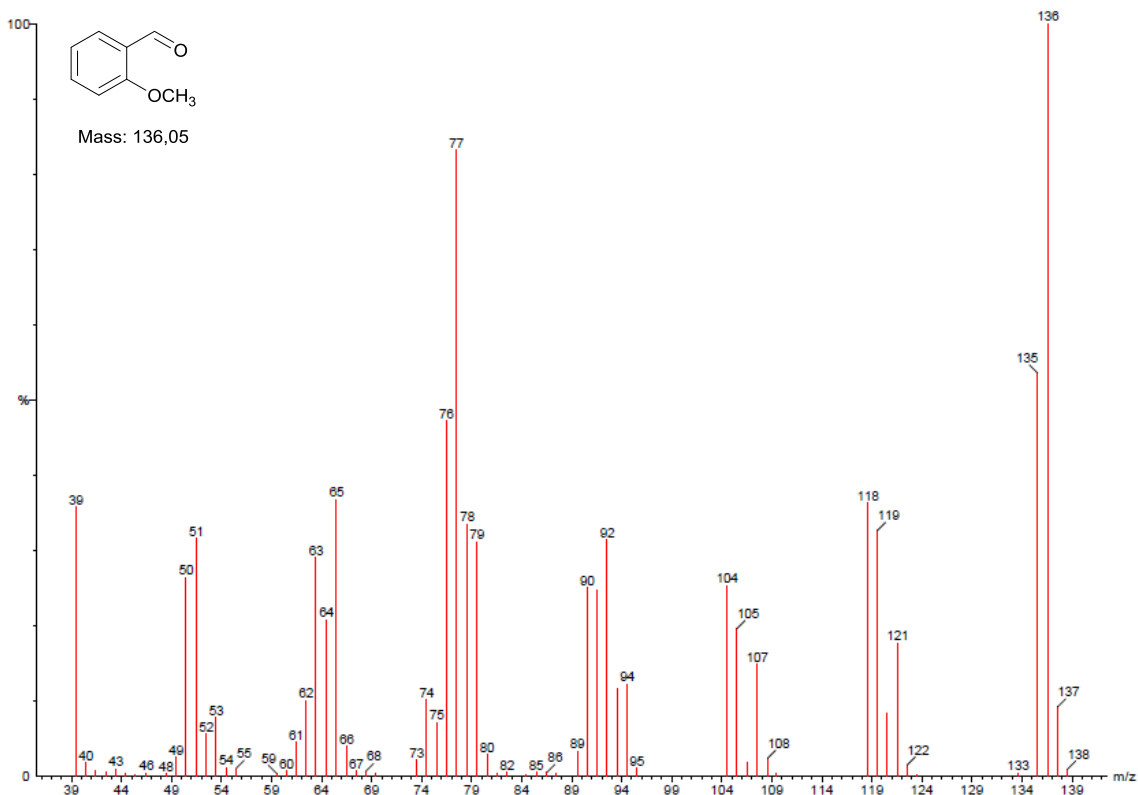

Figure 96 Entry 9 2-methoxybenzaldehyde

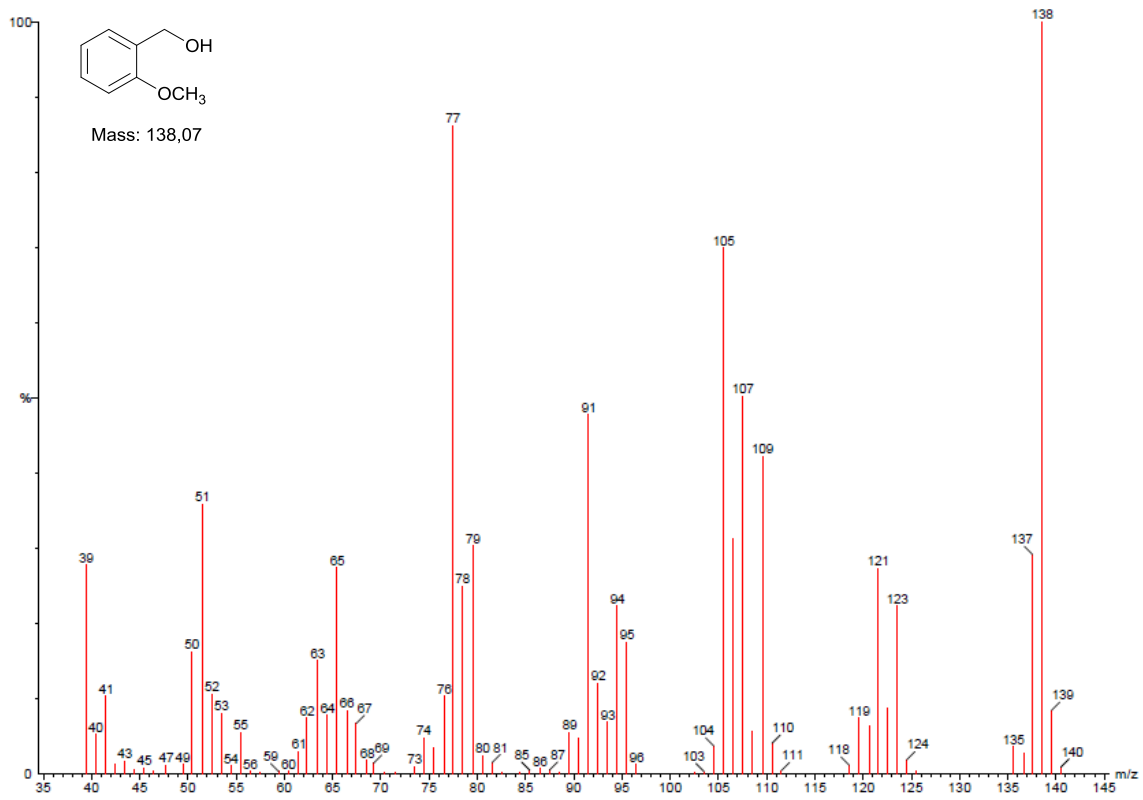

Figure 97 Entry 9 2-methoxybenzyl alcohol

### Entry 10 4-methoxybenzyl alcohol

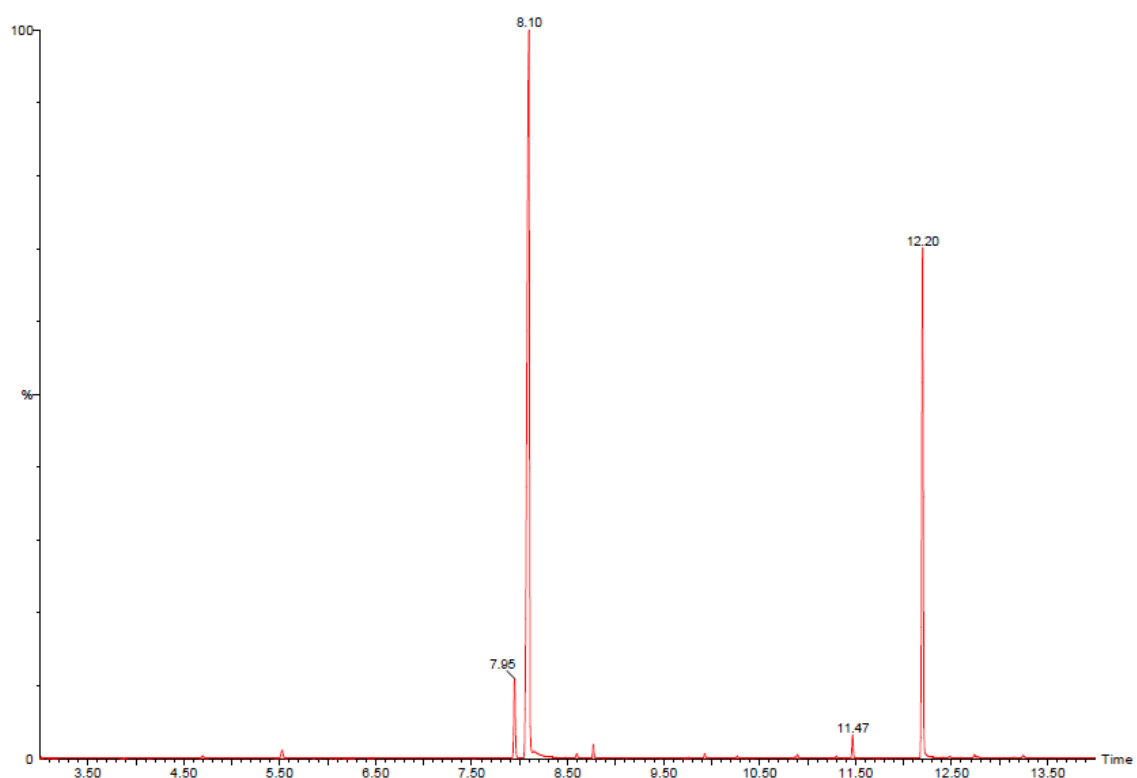

Figure 98 Entry 10 7.95 min.: 4-methoxybenzoic acid, 8.10 min.: 4-methoxybenzaldehyde, 12.20 min.: 4-methoxybenzyl 4-methoxybenzoate.

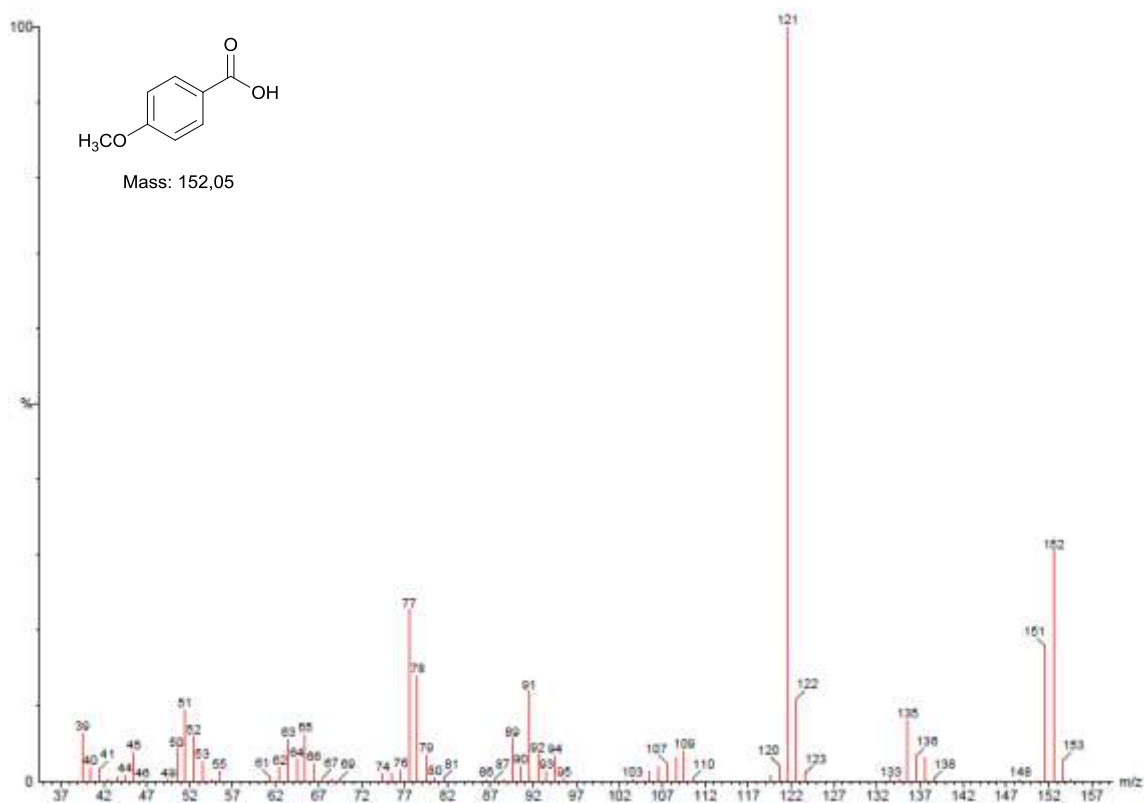

Figure 99. Entry 10, 7.95 min.: 4-methoxybenzoic acid

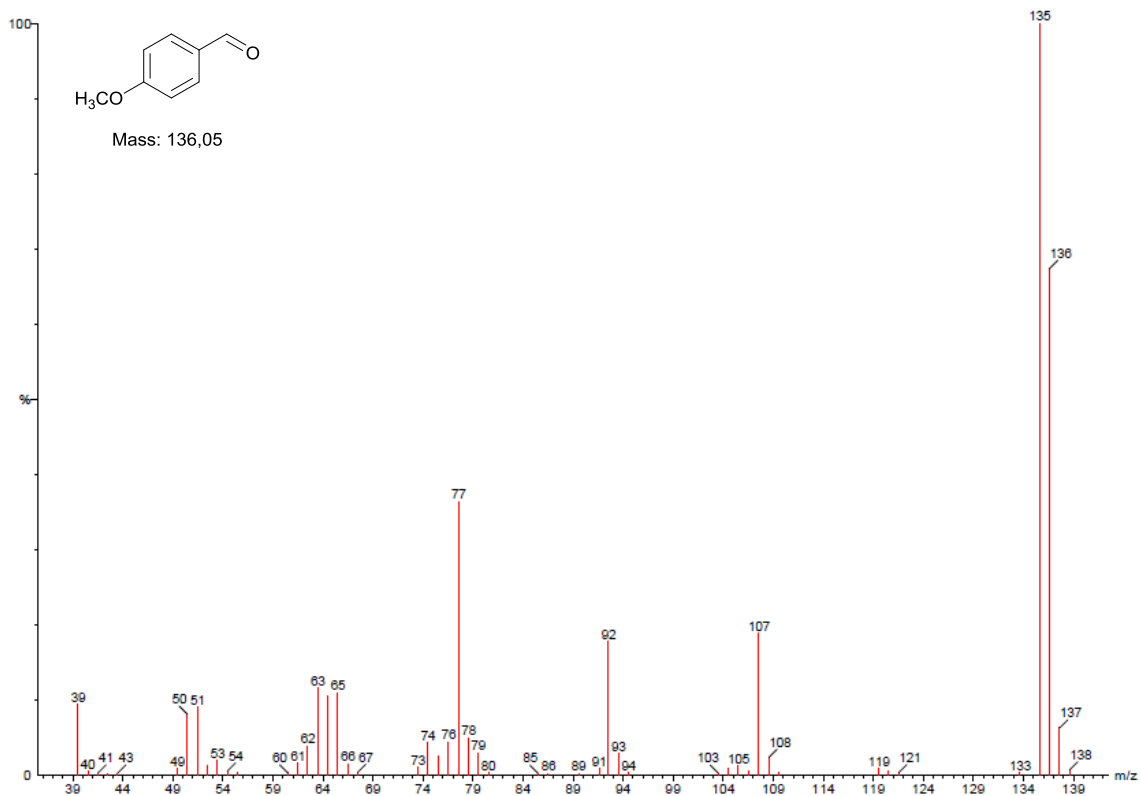

Figure 100 Entry 10, 8.10 min.: 4-methoxybenzaldehyde

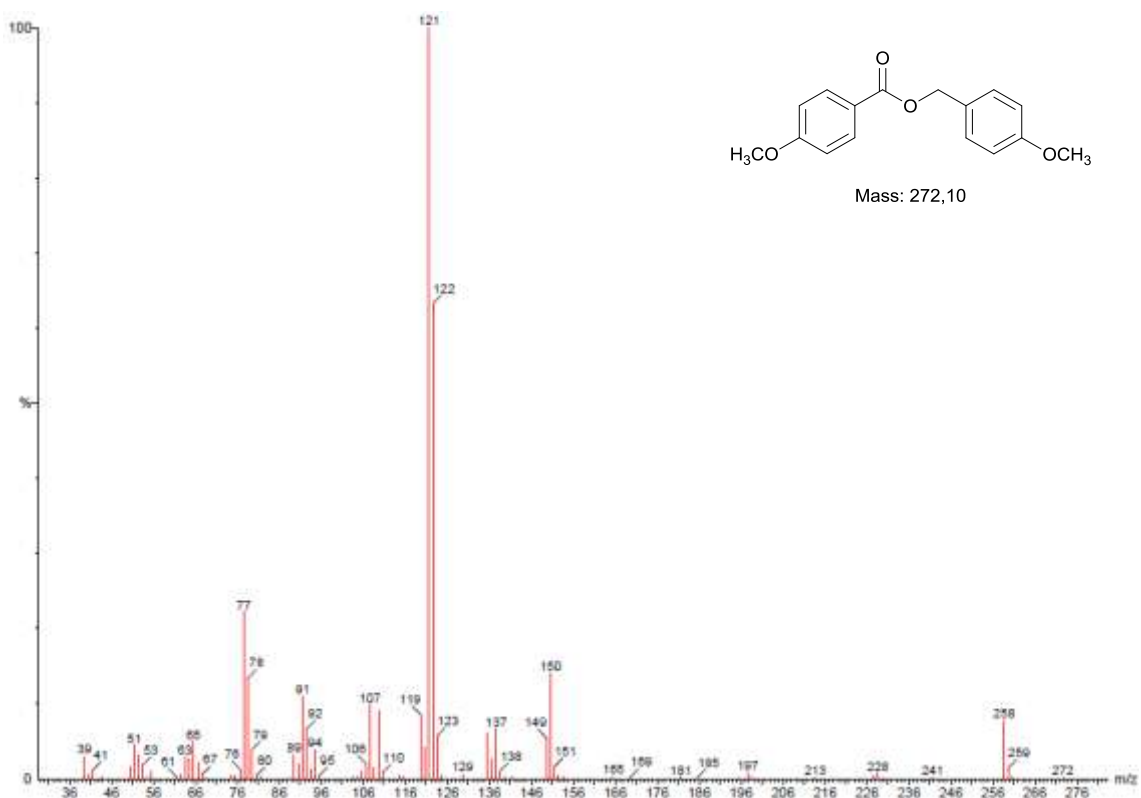

Figure 101. Entry 10, 12.20 min.: 4-methoxybenzyl 4-methoxybenzoate

<sup>1</sup>H NMR spectrum for benzyl alcohols oxidation

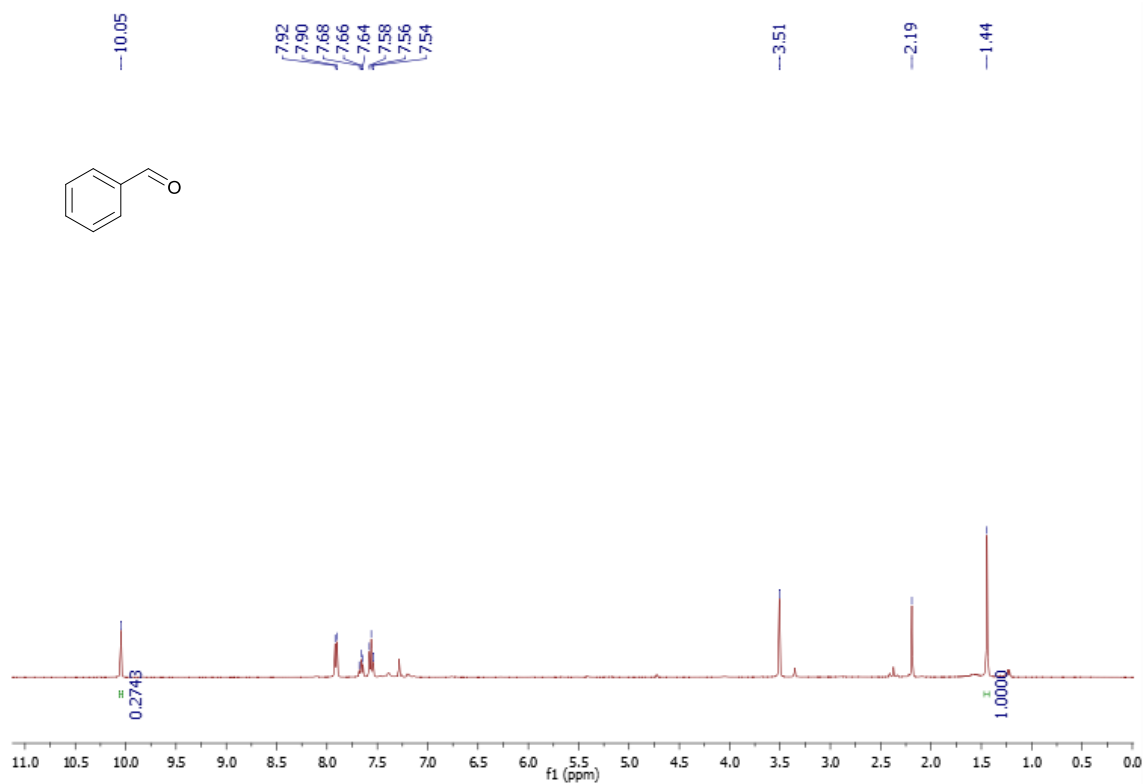

Figure 102 Benzyl alcohol oxidation; note: toluene (2.19 ppm)/ methanol (3.51 ppm). <sup>1</sup>H NMR (400 MHz) CDCl<sub>3</sub>

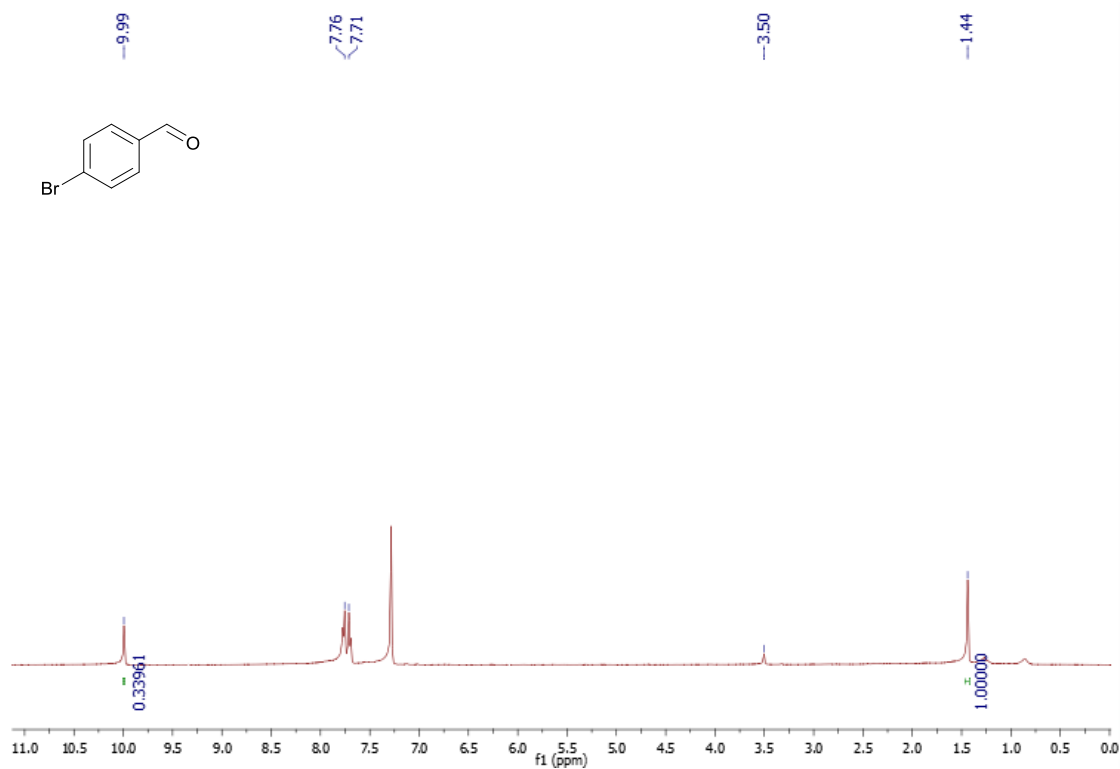

Figure 103 4-bromobenzyl alcohol oxidation, <sup>1</sup>H NMR (400 MHz) CDCl<sub>3</sub>



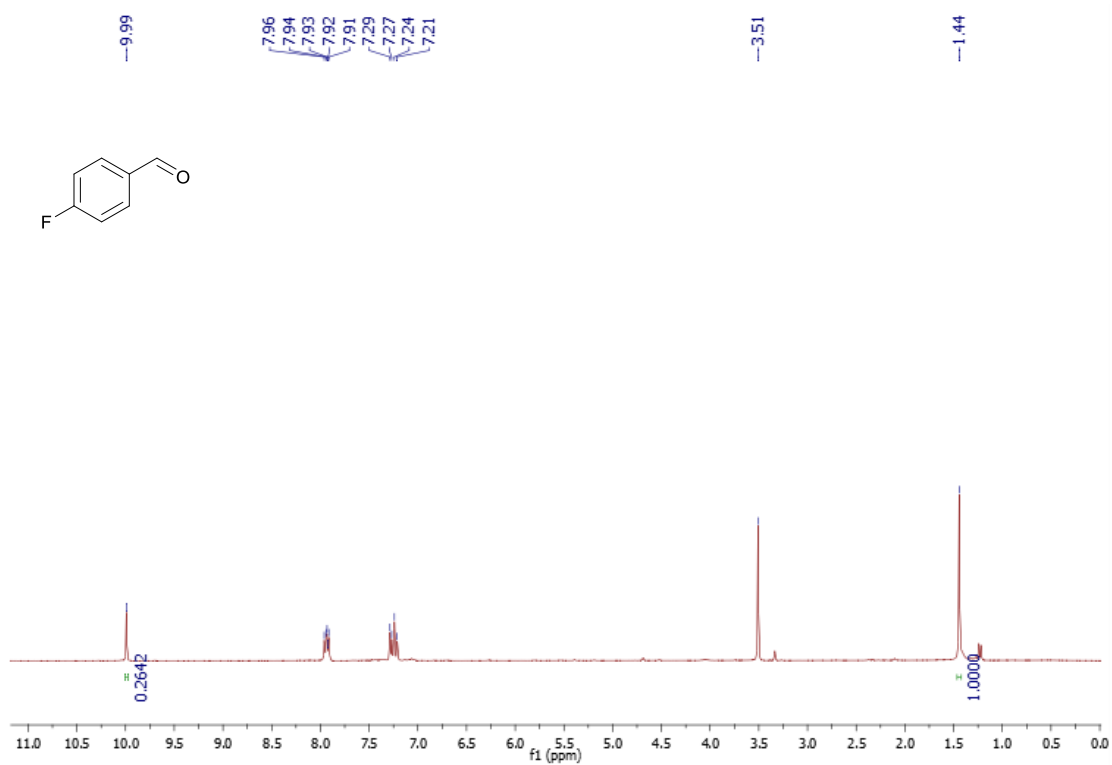

Figure 104 4-fluorobenzyl alcohol oxidation, <sup>1</sup>H NMR (400 MHz) CDCl<sub>3</sub>

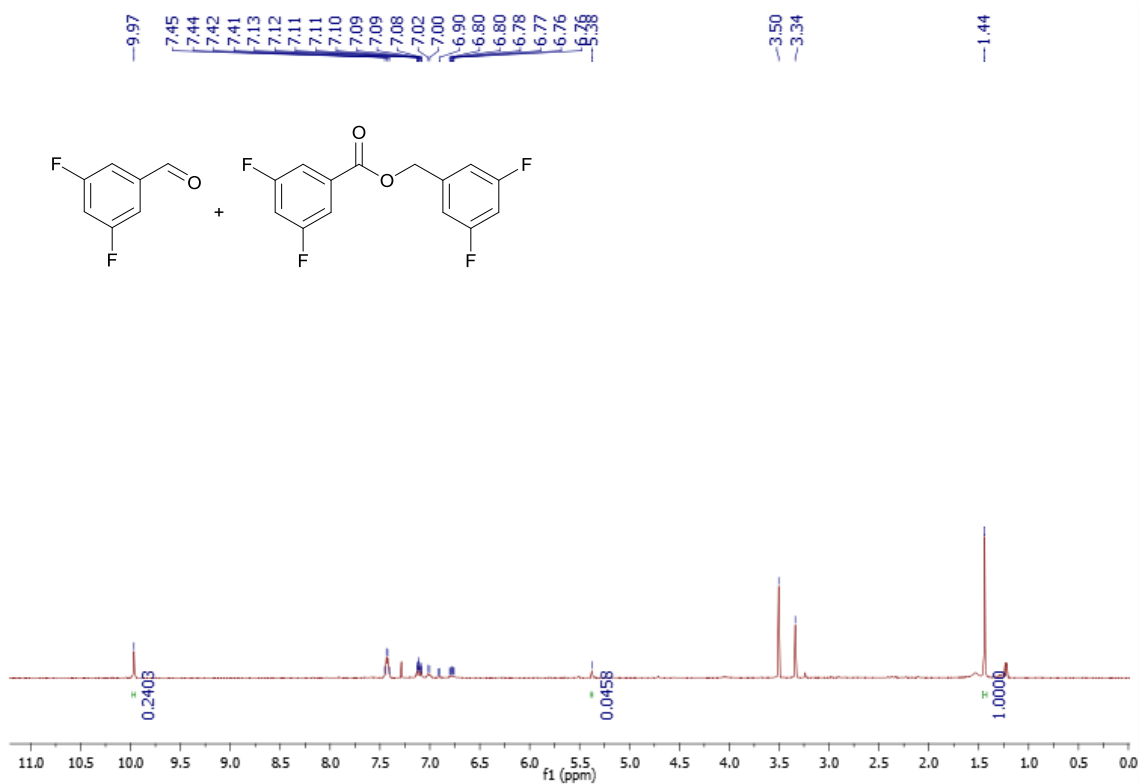

Figure 105 3,5-difluorobenzyl alcohol oxidation, <sup>1</sup>H NMR (400 MHz) CDCl<sub>3</sub>

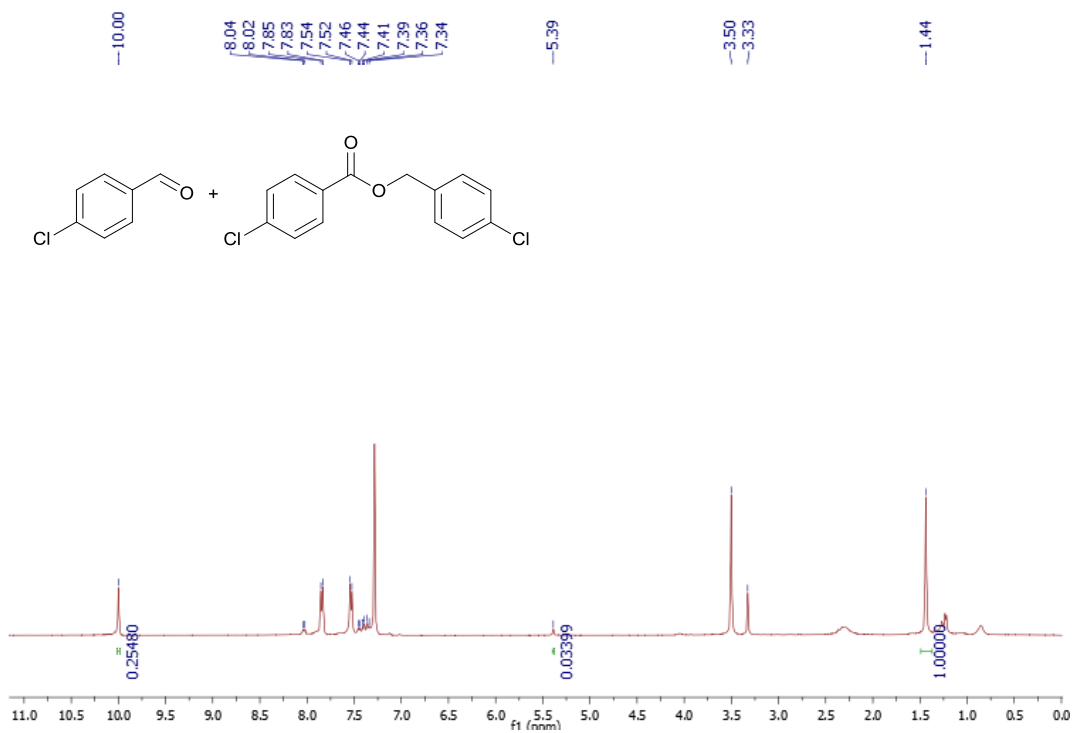

Figure 106 4-chlorobenzyl alcohol oxidation, <sup>1</sup>H NMR (400 MHz) CDCl<sub>3</sub>

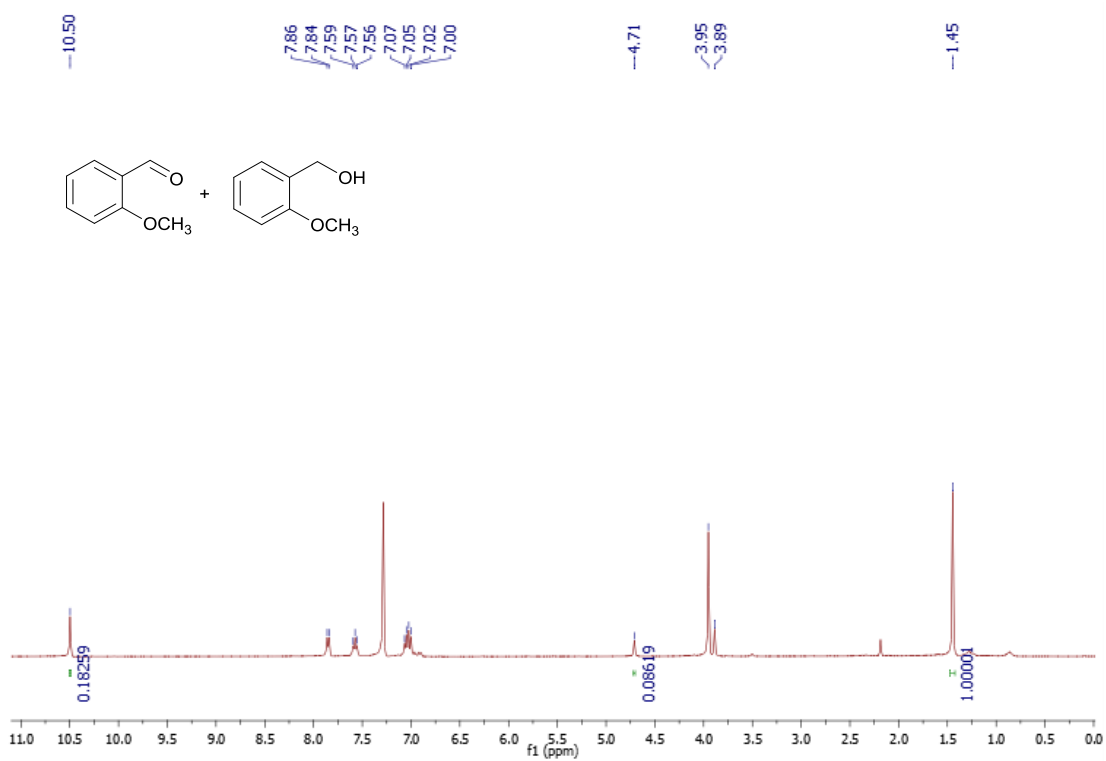

Figure 107 2-methoxybenzyl alcohol oxidation, <sup>1</sup>H NMR (400 MHz) CDCl<sub>3</sub>

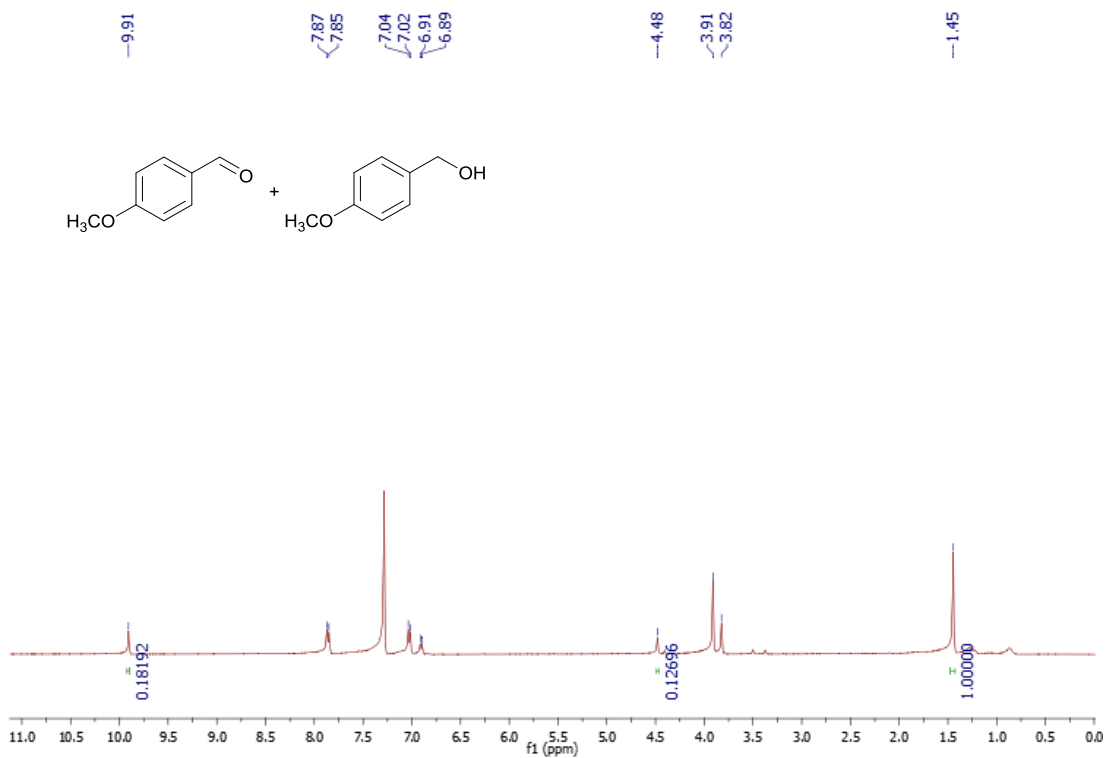

Figure 108 4-methoxybenzaldehyde oxidation,  $^1\text{H}$  NMR (400 MHz)  $\text{CDCl}_3$

#### 4.4. NMR spectrum of control experiments

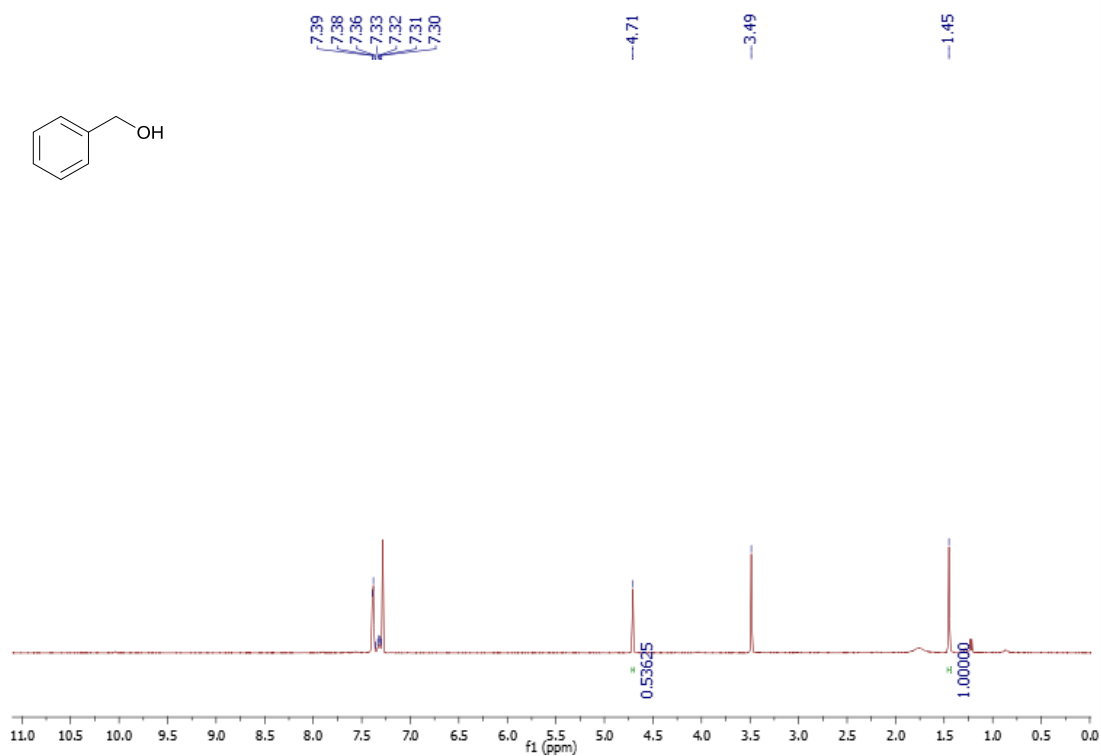

Figure 109 Test for oxidation of benzyl alcohol without catalyst,  $^1\text{H}$  NMR (400 MHz)  $\text{CDCl}_3$

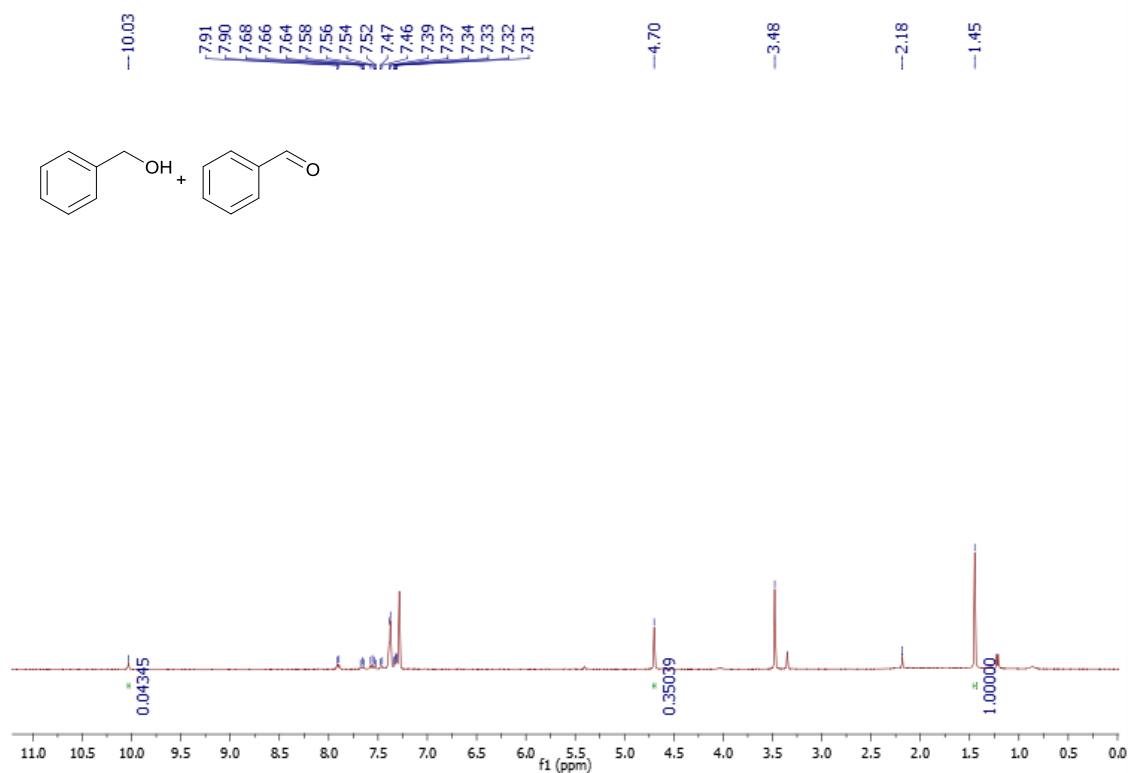

Figure 110 Test for oxidation of benzyl alcohol without  $O_2$   $^1H$  NMR (400 MHz)  $CDCl_3$

## 5. References

1. L. E. Heim, S. Vallazza, D. Van der Waals, M. H. G. Precht, *Green Chem.*, **2016**, **18**, 1469-1474.
2. L. E. Heim, N. E. Schlörer, J.-H. Choi, M. H. G. Precht, *Nat Commun.*, **2014**, **5**, Article 3621.
